# Supplementary material
Source: ML conference proceedings conference paper supplement (https://www.ecva.net/papers/eccv_2020/papers_ECCV/html/123580511_ECCV_2020_paper.php)
Supplement: Supplementary file 7 [file 123580511-supp.zip]

Archive with 18 entries (16 files):
- 1956-supp/
- 1956-supp/1956-supp.aux
- 1956-supp/1956-supp.bbl
- 1956-supp/1956-supp.blg
- 1956-supp/1956-supp.brf
- 1956-supp/1956-supp.log
- 1956-supp/1956-supp.pdf
- 1956-supp/1956-supp.synctex.gz
- 1956-supp/1956-supp.tex
- 1956-supp/egbib.bib
- 1956-supp/figs/
- 1956-supp/figs/result1.pdf
- 1956-supp/figs/result2.pdf
- 1956-supp/figs/result_annotation.pdf
- 1956-supp/figs/result_car.pdf
- 1956-supp/figs/result_Pedestrian.pdf
- 1956-supp/llncs.cls
- 1956-supp/splncs.bst
