# Supplementary material
Source: ML conference proceedings conference paper supplement (https://www.ecva.net/papers/eccv_2020/papers_ECCV/html/123580511_ECCV_2020_paper.php)
Supplement: Supplementary file 7 [file 123580511-supp.zip › 1956-supp/1956-supp.aux]

\relax 
\providecommand\hyper@newdestlabel[2]{}
\providecommand\HyperFirstAtBeginDocument{\AtBeginDocument}
\HyperFirstAtBeginDocument{\ifx\hyper@anchor\@undefined
\global\let\oldcontentsline\contentsline
\gdef\contentsline#1#2#3#4{\oldcontentsline{#1}{#2}{#3}}
\global\let\oldnewlabel\newlabel
\gdef\newlabel#1#2{\newlabelxx{#1}#2}
\gdef\newlabelxx#1#2#3#4#5#6{\oldnewlabel{#1}{{#2}{#3}}}
\AtEndDocument{\ifx\hyper@anchor\@undefined
\let\contentsline\oldcontentsline
\let\newlabel\oldnewlabel
\fi}
\fi}
\global\let\hyper@last\relax 
\gdef\HyperFirstAtBeginDocument#1{#1}
\providecommand\HyField@AuxAddToFields[1]{}
\providecommand\HyField@AuxAddToCoFields[2]{}
\citation{KITTI}
\citation{Lang_2019_CVPR}
\@writefile{toc}{\contentsline {title}{Weakly Supervised 3D Object Detection from \unskip \ \ignorespaces Lidar Point Cloud \unskip \ \ignorespaces \textit  {Supplementary Material}}{1}{chapter.1}\protected@file@percent }
\@writefile{toc}{\authcount {6}}
\@writefile{toc}{\contentsline {author}{Qinghao Meng$^{1}$\and {\fontfamily  {mvs}\fontencoding  {U}\fontseries  {m}\fontshape  {n}\selectfont  \char 66}Wenguan Wang$^{2}$\and Tianfei Zhou$^{3}$\and \unskip \ \ignorespaces  Jianbing Shen$^{3,1}$\and Luc Van Gool$^{2}$\and Dengxin Dai$^{2}$}{1}{chapter.1}\protected@file@percent }
\@writefile{brf}{\backcite{KITTI}{{1}{1}{chapter.1}}}
\@writefile{toc}{\contentsline {section}{\numberline {1}Weakly Supervised 3D Pedestrian Detection}{1}{section.1.1}\protected@file@percent }
\newlabel{sec: Strategy}{{1}{1}{Weakly Supervised 3D Pedestrian Detection}{section.1.1}{}}
\@writefile{brf}{\backcite{Lang_2019_CVPR}{{1}{1}{section.1.1}}}
\@writefile{lof}{\contentsline {figure}{\numberline {1}{\ignorespaces {\textbf  {Qualitative results of 3D object detection} (Pedestrian) on KITTI \texttt  {val} set. Detected 3D bounding boxes on image and point cloud pairs are depicted in yellow. }}}{2}{figure.1.1}\protected@file@percent }
\newlabel{fig:vresults}{{1}{2}{\textbf {Qualitative results of 3D object detection} (Pedestrian) on KITTI \texttt {val} set. Detected 3D bounding boxes on image and point cloud pairs are depicted in yellow}{figure.1.1}{}}
\@writefile{toc}{\contentsline {section}{\numberline {2}Qualitative Results on KITTI \texttt  {val} Set (Pedestrian)}{2}{section.1.2}\protected@file@percent }
\newlabel{sec:Visualization}{{2}{2}{Qualitative Results on KITTI \texttt {val} Set (Pedestrian)}{section.1.2}{}}
\@writefile{toc}{\contentsline {section}{\numberline {3}Annotation Results on KITTI \texttt  {val} Set (Car)}{2}{section.1.3}\protected@file@percent }
\newlabel{sec:annotator}{{3}{2}{Annotation Results on KITTI \texttt {val} Set (Car)}{section.1.3}{}}
\@writefile{lof}{\contentsline {figure}{\numberline {2}{\ignorespaces {\textbf  {Annotation results for 3D object detection} (Car) on KITTI \texttt  {val} set. labeled 3D bounding boxes on image and point cloud pairs are depicted in yellow. The improved annotations are highlighted by red circles. Zoom-in for details.}}}{3}{figure.1.2}\protected@file@percent }
\newlabel{fig:annresults}{{2}{3}{\textbf {Annotation results for 3D object detection} (Car) on KITTI \texttt {val} set. labeled 3D bounding boxes on image and point cloud pairs are depicted in yellow. The improved annotations are highlighted by red circles. Zoom-in for details}{figure.1.2}{}}
\@writefile{toc}{\contentsline {section}{\numberline {4}Failure Cases on KITTI \texttt  {val} Set (Car\&Pedestrian)}{3}{section.1.4}\protected@file@percent }
\newlabel{sec:failure}{{4}{3}{Failure Cases on KITTI \texttt {val} Set (Car\&Pedestrian)}{section.1.4}{}}
\bibstyle{splncs}
\bibdata{egbib}
\bibcite{KITTI}{1}
\bibcite{Lang_2019_CVPR}{2}
\@writefile{lof}{\contentsline {figure}{\numberline {3}{\ignorespaces {\textbf  {Failure cases of 3D car detection} on KITTI \texttt  {val} set. Predicted 3D bounding boxes on image and point cloud pairs are depicted in yellow. The inaccurate predictions are highlighted by red circles. Zoom-in for details.}}}{4}{figure.1.3}\protected@file@percent }
\newlabel{fig:fcases_car}{{3}{4}{\textbf {Failure cases of 3D car detection} on KITTI \texttt {val} set. Predicted 3D bounding boxes on image and point cloud pairs are depicted in yellow. The inaccurate predictions are highlighted by red circles. Zoom-in for details}{figure.1.3}{}}
\@writefile{lof}{\contentsline {figure}{\numberline {4}{\ignorespaces {\textbf  {Failure cases of 3D pedestrian detection} on KITTI \texttt  {val} set. Predicted 3D bounding boxes on image and point cloud pairs are depicted in yellow. The inaccurate predictions are highlighted by red circles. Zoom-in for details.}}}{4}{figure.1.4}\protected@file@percent }
\newlabel{fig:fcases_ped}{{4}{4}{\textbf {Failure cases of 3D pedestrian detection} on KITTI \texttt {val} set. Predicted 3D bounding boxes on image and point cloud pairs are depicted in yellow. The inaccurate predictions are highlighted by red circles. Zoom-in for details}{figure.1.4}{}}
