# Supplementary material
Source: ML conference proceedings conference paper supplement (https://www.ecva.net/papers/eccv_2020/papers_ECCV/html/123580511_ECCV_2020_paper.php)
Supplement: Supplementary file 7 [file 123580511-supp.zip › 1956-supp/1956-supp.bbl]

\begin{thebibliography}{1}

\bibitem{KITTI}
Geiger, A., Lenz, P., Urtasun, R.:
\newblock Are we ready for autonomous driving? {}the {KITTI} vision benchmark
  suite.
\newblock In: CVPR. (2012)

\bibitem{Lang_2019_CVPR}
Lang, A.H., Vora, S., Caesar, H., Zhou, L., Yang, J., Beijbom, O.:
\newblock Pointpillars: Fast encoders for object detection from point clouds.
\newblock In: CVPR. (2019)

\end{thebibliography}
