# Supplementary material
Source: ML conference proceedings conference paper supplement (https://www.ecva.net/papers/eccv_2020/papers_ECCV/html/123580511_ECCV_2020_paper.php)
Supplement: Supplementary file 7 [file 123580511-supp.zip › 1956-supp/1956-supp.blg]

This is BibTeX, Version 0.99dThe top-level auxiliary file: 1956-supp.aux
The style file: splncs.bst
Database file #1: egbib.bib
