# Supplementary material
Source: ML conference proceedings conference paper supplement (https://www.ecva.net/papers/eccv_2020/papers_ECCV/html/123580511_ECCV_2020_paper.php)
Supplement: Supplementary file 7 [file 123580511-supp.zip › 1956-supp/1956-supp.brf]

\backcite {KITTI}{{1}{1}{chapter.1}}
\backcite {Lang_2019_CVPR}{{1}{1}{section.1.1}}
