# Supplementary material
Source: ML conference proceedings conference paper supplement (https://www.ecva.net/papers/eccv_2020/papers_ECCV/html/123580511_ECCV_2020_paper.php)
Supplement: Supplementary file 7 [file 123580511-supp.zip › 1956-supp/1956-supp.log]

This is pdfTeX, Version 3.14159265-2.6-1.40.21 (TeX Live 2020/W32TeX) (preloaded format=pdflatex 2020.7.10)  17 JUL 2020 23:23
entering extended mode
 restricted \write18 enabled.
 %&-line parsing enabled.
**1956-supp.tex
(./1956-supp.tex
LaTeX2e <2020-02-02> patch level 5
L3 programming layer <2020-03-06> (./llncs.cls
Document Class: llncs 2018/03/10 v2.20 
 LaTeX document class for Lecture Notes in Computer Science
(d:/Program Files/texlive/texmf-dist/tex/latex/base/article.cls
Document Class: article 2019/12/20 v1.4l Standard LaTeX document class
(d:/Program Files/texlive/texmf-dist/tex/latex/base/size10.clo
File: size10.clo 2019/12/20 v1.4l Standard LaTeX file (size option)
)
\c@part=\count167
\c@section=\count168
\c@subsection=\count169
\c@subsubsection=\count170
\c@paragraph=\count171
\c@subparagraph=\count172
\c@figure=\count173
\c@table=\count174
\abovecaptionskip=\skip47
\belowcaptionskip=\skip48
\bibindent=\dimen134
)
(d:/Program Files/texlive/texmf-dist/tex/latex/tools/multicol.sty
Package: multicol 2019/12/09 v1.8y multicolumn formatting (FMi)
\c@tracingmulticols=\count175
\mult@box=\box45
\multicol@leftmargin=\dimen135
\c@unbalance=\count176
\c@collectmore=\count177
\doublecol@number=\count178
\multicoltolerance=\count179
\multicolpretolerance=\count180
\full@width=\dimen136
\page@free=\dimen137
\premulticols=\dimen138
\postmulticols=\dimen139
\multicolsep=\skip49
\multicolbaselineskip=\skip50
\partial@page=\box46
\last@line=\box47
\maxbalancingoverflow=\dimen140
\mult@rightbox=\box48
\mult@grightbox=\box49
\mult@gfirstbox=\box50
\mult@firstbox=\box51
\@tempa=\box52
\@tempa=\box53
\@tempa=\box54
\@tempa=\box55
\@tempa=\box56
\@tempa=\box57
\@tempa=\box58
\@tempa=\box59
\@tempa=\box60
\@tempa=\box61
\@tempa=\box62
\@tempa=\box63
\@tempa=\box64
\@tempa=\box65
\@tempa=\box66
\@tempa=\box67
\@tempa=\box68
\@tempa=\box69
\@tempa=\box70
\@tempa=\box71
\@tempa=\box72
\@tempa=\box73
\@tempa=\box74
\@tempa=\box75
\@tempa=\box76
\@tempa=\box77
\@tempa=\box78
\@tempa=\box79
\@tempa=\box80
\@tempa=\box81
\@tempa=\box82
\@tempa=\box83
\@tempa=\box84
\@tempa=\box85
\@tempa=\box86
\@tempa=\box87
\@tempa=\box88
\c@minrows=\count181
\c@columnbadness=\count182
\c@finalcolumnbadness=\count183
\last@try=\dimen141
\multicolovershoot=\dimen142
\multicolundershoot=\dimen143
\mult@nat@firstbox=\box89
\colbreak@box=\box90
\mc@col@check@num=\count184
)
(d:/Program Files/texlive/texmf-dist/tex/latex/oberdiek/aliascnt.sty
Package: aliascnt 2018/09/07 v1.5 Alias counters (HO)
)
\c@chapter=\count185
LaTeX Font Info:    Redeclaring math symbol \Gamma on input line 362.
LaTeX Font Info:    Redeclaring math symbol \Delta on input line 363.
LaTeX Font Info:    Redeclaring math symbol \Theta on input line 364.
LaTeX Font Info:    Redeclaring math symbol \Lambda on input line 365.
LaTeX Font Info:    Redeclaring math symbol \Xi on input line 366.
LaTeX Font Info:    Redeclaring math symbol \Pi on input line 367.
LaTeX Font Info:    Redeclaring math symbol \Sigma on input line 368.
LaTeX Font Info:    Redeclaring math symbol \Upsilon on input line 369.
LaTeX Font Info:    Redeclaring math symbol \Phi on input line 370.
LaTeX Font Info:    Redeclaring math symbol \Psi on input line 371.
LaTeX Font Info:    Redeclaring math symbol \Omega on input line 372.
\tocchpnum=\dimen144
\tocsecnum=\dimen145
\tocsectotal=\dimen146
\tocsubsecnum=\dimen147
\tocsubsectotal=\dimen148
\tocsubsubsecnum=\dimen149
\tocsubsubsectotal=\dimen150
\tocparanum=\dimen151
\tocparatotal=\dimen152
\tocsubparanum=\dimen153
\@tempcntc=\count186
\fnindent=\dimen154
\c@@inst=\count187
\c@@auth=\count188
\c@auco=\count189
\instindent=\dimen155
\authrun=\box91
\authorrunning=\toks15
\tocauthor=\toks16
\titrun=\box92
\titlerunning=\toks17
\toctitle=\toks18
\c@theorem=\count190
\c@case=\count191
\c@conjecture=\count192
\c@corollary=\count193
\c@definition=\count194
\c@example=\count195
\c@exercise=\count196
\c@lemma=\count197
\c@note=\count198
\c@problem=\count199
\c@property=\count266
\c@proposition=\count267
\c@question=\count268
\c@solution=\count269
\c@remark=\count270
\headlineindent=\dimen156
)
(d:/Program Files/texlive/texmf-dist/tex/latex/graphics/graphicx.sty
Package: graphicx 2019/11/30 v1.2a Enhanced LaTeX Graphics (DPC,SPQR)

(d:/Program Files/texlive/texmf-dist/tex/latex/graphics/keyval.sty
Package: keyval 2014/10/28 v1.15 key=value parser (DPC)
\KV@toks@=\toks19
)
(d:/Program Files/texlive/texmf-dist/tex/latex/graphics/graphics.sty
Package: graphics 2019/11/30 v1.4a Standard LaTeX Graphics (DPC,SPQR)

(d:/Program Files/texlive/texmf-dist/tex/latex/graphics/trig.sty
Package: trig 2016/01/03 v1.10 sin cos tan (DPC)
)
(d:/Program Files/texlive/texmf-dist/tex/latex/graphics-cfg/graphics.cfg
File: graphics.cfg 2016/06/04 v1.11 sample graphics configuration
)
Package graphics Info: Driver file: pdftex.def on input line 105.

(d:/Program Files/texlive/texmf-dist/tex/latex/graphics-def/pdftex.def
File: pdftex.def 2018/01/08 v1.0l Graphics/color driver for pdftex
))
\Gin@req@height=\dimen157
\Gin@req@width=\dimen158
)
(d:/Program Files/texlive/texmf-dist/tex/latex/amsmath/amsmath.sty
Package: amsmath 2020/01/20 v2.17e AMS math features
\@mathmargin=\skip51

For additional information on amsmath, use the `?' option.
(d:/Program Files/texlive/texmf-dist/tex/latex/amsmath/amstext.sty
Package: amstext 2000/06/29 v2.01 AMS text

(d:/Program Files/texlive/texmf-dist/tex/latex/amsmath/amsgen.sty
File: amsgen.sty 1999/11/30 v2.0 generic functions
\@emptytoks=\toks20
\ex@=\dimen159
))
(d:/Program Files/texlive/texmf-dist/tex/latex/amsmath/amsbsy.sty
Package: amsbsy 1999/11/29 v1.2d Bold Symbols
\pmbraise@=\dimen160
)
(d:/Program Files/texlive/texmf-dist/tex/latex/amsmath/amsopn.sty
Package: amsopn 2016/03/08 v2.02 operator names
)
\inf@bad=\count271
LaTeX Info: Redefining \frac on input line 227.
\uproot@=\count272
\leftroot@=\count273
LaTeX Info: Redefining \overline on input line 389.
\classnum@=\count274
\DOTSCASE@=\count275
LaTeX Info: Redefining \ldots on input line 486.
LaTeX Info: Redefining \dots on input line 489.
LaTeX Info: Redefining \cdots on input line 610.
\Mathstrutbox@=\box93
\strutbox@=\box94
\big@size=\dimen161
LaTeX Font Info:    Redeclaring font encoding OML on input line 733.
LaTeX Font Info:    Redeclaring font encoding OMS on input line 734.
\macc@depth=\count276
\c@MaxMatrixCols=\count277
\dotsspace@=\muskip16
\c@parentequation=\count278
\dspbrk@lvl=\count279
\tag@help=\toks21
\row@=\count280
\column@=\count281
\maxfields@=\count282
\andhelp@=\toks22
\eqnshift@=\dimen162
\alignsep@=\dimen163
\tagshift@=\dimen164
\tagwidth@=\dimen165
\totwidth@=\dimen166
\lineht@=\dimen167
\@envbody=\toks23
\multlinegap=\skip52
\multlinetaggap=\skip53
\mathdisplay@stack=\toks24
LaTeX Info: Redefining \[ on input line 2859.
LaTeX Info: Redefining \] on input line 2860.
)
(d:/Program Files/texlive/texmf-dist/tex/latex/amsfonts/amssymb.sty
Package: amssymb 2013/01/14 v3.01 AMS font symbols

(d:/Program Files/texlive/texmf-dist/tex/latex/amsfonts/amsfonts.sty
Package: amsfonts 2013/01/14 v3.01 Basic AMSFonts support
\symAMSa=\mathgroup4
\symAMSb=\mathgroup5
LaTeX Font Info:    Redeclaring math symbol \hbar on input line 98.
LaTeX Font Info:    Overwriting math alphabet `\mathfrak' in version `bold'
(Font)                  U/euf/m/n --> U/euf/b/n on input line 106.
))
(d:/Program Files/texlive/texmf-dist/tex/latex/url/url.sty
\Urlmuskip=\muskip17
Package: url 2013/09/16  ver 3.4  Verb mode for urls, etc.
)
(d:/Program Files/texlive/texmf-dist/tex/latex/cite/cite.sty
LaTeX Info: Redefining \cite on input line 302.
LaTeX Info: Redefining \nocite on input line 332.
Package: cite 2015/02/27  v 5.5
)
(d:/Program Files/texlive/texmf-dist/tex/latex/graphics/color.sty
Package: color 2019/11/23 v1.2a Standard LaTeX Color (DPC)

(d:/Program Files/texlive/texmf-dist/tex/latex/graphics-cfg/color.cfg
File: color.cfg 2016/01/02 v1.6 sample color configuration
)
Package color Info: Driver file: pdftex.def on input line 147.
)
(d:/Program Files/texlive/texmf-dist/tex/latex/wrapfig/wrapfig.sty
\wrapoverhang=\dimen168
\WF@size=\dimen169
\c@WF@wrappedlines=\count283
\WF@box=\box95
\WF@everypar=\toks25
Package: wrapfig 2003/01/31  v 3.6
)
(d:/Program Files/texlive/texmf-dist/tex/latex/graphics/epsfig.sty
Package: epsfig 2017/06/25 v1.7b (e)psfig emulation (SPQR)
\epsfxsize=\dimen170
\epsfysize=\dimen171
)
(d:/Program Files/texlive/texmf-dist/tex/latex/multirow/multirow.sty
Package: multirow 2019/05/31 v2.5 Span multiple rows of a table
\multirow@colwidth=\skip54
\multirow@cntb=\count284
\multirow@dima=\skip55
\bigstrutjot=\dimen172
)
(d:/Program Files/texlive/texmf-dist/tex/latex/booktabs/booktabs.sty
Package: booktabs 2020/01/12 v1.61803398 Publication quality tables
\heavyrulewidth=\dimen173
\lightrulewidth=\dimen174
\cmidrulewidth=\dimen175
\belowrulesep=\dimen176
\belowbottomsep=\dimen177
\aboverulesep=\dimen178
\abovetopsep=\dimen179
\cmidrulesep=\dimen180
\cmidrulekern=\dimen181
\defaultaddspace=\dimen182
\@cmidla=\count285
\@cmidlb=\count286
\@aboverulesep=\dimen183
\@belowrulesep=\dimen184
\@thisruleclass=\count287
\@lastruleclass=\count288
\@thisrulewidth=\dimen185
)
(d:/Program Files/texlive/texmf-dist/tex/latex/xcolor/xcolor.sty
Package: xcolor 2016/05/11 v2.12 LaTeX color extensions (UK)

(d:/Program Files/texlive/texmf-dist/tex/latex/graphics-cfg/color.cfg
File: color.cfg 2016/01/02 v1.6 sample color configuration
)
Package xcolor Info: Driver file: pdftex.def on input line 225.

(d:/Program Files/texlive/texmf-dist/tex/latex/colortbl/colortbl.sty
Package: colortbl 2020/01/04 v1.0e Color table columns (DPC)

(d:/Program Files/texlive/texmf-dist/tex/latex/tools/array.sty
Package: array 2019/08/31 v2.4l Tabular extension package (FMi)
\col@sep=\dimen186
\ar@mcellbox=\box96
\extrarowheight=\dimen187
\NC@list=\toks26
\extratabsurround=\skip56
\backup@length=\skip57
\ar@cellbox=\box97
)
\everycr=\toks27
\minrowclearance=\skip58
)
LaTeX Info: Redefining \color on input line 709.
\rownum=\count289
Package xcolor Info: Model `cmy' substituted by `cmy0' on input line 1348.
Package xcolor Info: Model `hsb' substituted by `rgb' on input line 1352.
Package xcolor Info: Model `RGB' extended on input line 1364.
Package xcolor Info: Model `HTML' substituted by `rgb' on input line 1366.
Package xcolor Info: Model `Hsb' substituted by `hsb' on input line 1367.
Package xcolor Info: Model `tHsb' substituted by `hsb' on input line 1368.
Package xcolor Info: Model `HSB' substituted by `hsb' on input line 1369.
Package xcolor Info: Model `Gray' substituted by `gray' on input line 1370.
Package xcolor Info: Model `wave' substituted by `hsb' on input line 1371.
)
(d:/Program Files/texlive/texmf-dist/tex/latex/algorithms/algorithm.sty
Package: algorithm 2009/08/24 v0.1 Document Style `algorithm' - floating enviro
nment

(d:/Program Files/texlive/texmf-dist/tex/latex/float/float.sty
Package: float 2001/11/08 v1.3d Float enhancements (AL)
\c@float@type=\count290
\float@exts=\toks28
\float@box=\box98
\@float@everytoks=\toks29
\@floatcapt=\box99
)
(d:/Program Files/texlive/texmf-dist/tex/latex/base/ifthen.sty
Package: ifthen 2014/09/29 v1.1c Standard LaTeX ifthen package (DPC)
)
\@float@every@algorithm=\toks30
\c@algorithm=\count291
)
(d:/Program Files/texlive/texmf-dist/tex/latex/algorithms/algorithmic.sty
Package: algorithmic 2009/08/24 v0.1 Document Style `algorithmic'
\c@ALC@unique=\count292
\c@ALC@line=\count293
\c@ALC@rem=\count294
\c@ALC@depth=\count295
\ALC@tlm=\skip59
\algorithmicindent=\skip60
)
(d:/Program Files/texlive/texmf-dist/tex/latex/arydshln/arydshln.sty
Package: arydshln 2019/02/21 v1.76 
\dashlinedash=\dimen188
\dashlinegap=\dimen189
\adl@box=\box100
\adl@height=\dimen190
\adl@heightsave=\dimen191
\adl@depth=\dimen192
\adl@depthsave=\dimen193
\adl@finaldepth=\dimen194
\adl@columns=\count296
\adl@ncol=\count297
\adl@currentcolumn=\count298
\adl@currentcolumnsave=\count299
\adl@totalheight=\count300
\adl@totalheightsave=\count301
\adl@dash=\count302
\adl@gap=\count303
\adl@cla=\count304
\adl@clb=\count305
\adl@everyvbox=\toks31
\adl@LTpagetotal=\dimen195
)
(d:/Program Files/texlive/texmf-dist/tex/latex/threeparttable/threeparttable.st
y
Package: threeparttable 2003/06/13  v 3.0
\@tempboxb=\box101
) (d:/Program Files/texlive/texmf-dist/tex/latex/enumitem/enumitem.sty
Package: enumitem 2019/06/20 v3.9 Customized lists
\labelindent=\skip61
\enit@outerparindent=\dimen196
\enit@toks=\toks32
\enit@inbox=\box102
\enit@count@id=\count306
\enitdp@description=\count307
)
(d:/Program Files/texlive/texmf-dist/tex/latex/siunitx/siunitx.sty
(d:/Program Files/texlive/texmf-dist/tex/latex/l3kernel/expl3.sty
Package: expl3 2020-03-06 L3 programming layer (loader) 

(d:/Program Files/texlive/texmf-dist/tex/latex/l3backend/l3backend-pdfmode.def
File: l3backend-pdfmode.def 2020-03-12 L3 backend support: PDF mode
\l__kernel_color_stack_int=\count308
\l__pdf_internal_box=\box103
)) (d:/Program Files/texlive/texmf-dist/tex/latex/l3packages/xparse/xparse.sty
Package: xparse 2020-03-06 L3 Experimental document command parser
\l__xparse_current_arg_int=\count309
\g__xparse_grabber_int=\count310
\l__xparse_m_args_int=\count311
\l__xparse_v_nesting_int=\count312
)
Package: siunitx 2020/02/25 v2.8b A comprehensive (SI) units package

(d:/Program Files/texlive/texmf-dist/tex/latex/l3packages/l3keys2e/l3keys2e.sty
Package: l3keys2e 2020-03-06 LaTeX2e option processing using LaTeX3 keys
)
\l__siunitx_tmp_box=\box104
\l__siunitx_tmp_dim=\dimen197
\l__siunitx_tmp_int=\count313
\l__siunitx_number_mantissa_length_int=\count314
\l__siunitx_number_uncert_length_int=\count315
\l__siunitx_round_int=\count316
\l__siunitx_process_decimal_int=\count317
\l__siunitx_process_uncertainty_int=\count318
\l__siunitx_process_fixed_int=\count319
\l__siunitx_process_integer_min_int=\count320
\l__siunitx_process_precision_int=\count321
\l__siunitx_group_min_int=\count322
\l__siunitx_angle_marker_box=\box105
\l__siunitx_angle_unit_box=\box106
\l__siunitx_angle_marker_dim=\dimen198
\l__siunitx_angle_unit_dim=\dimen199
\l__siunitx_unit_int=\count323
\l__siunitx_unit_denominator_int=\count324
\l__siunitx_unit_numerator_int=\count325
\l__siunitx_unit_prefix_int=\count326
\l__siunitx_unit_prefix_base_int=\count327
\l__siunitx_unit_prefix_gram_int=\count328
\l__siunitx_number_product_int=\count329
\c__siunitx_one_fill_skip=\skip62
\l__siunitx_table_unit_align_skip=\skip63
\l__siunitx_table_exponent_dim=\dimen256
\l__siunitx_table_integer_dim=\dimen257
\l__siunitx_table_mantissa_dim=\dimen258
\l__siunitx_table_marker_dim=\dimen259
\l__siunitx_table_result_dim=\dimen260
\l__siunitx_table_uncert_dim=\dimen261
\l__siunitx_table_fill_pre_dim=\dimen262
\l__siunitx_table_fill_post_dim=\dimen263
\l__siunitx_table_fill_mid_dim=\dimen264
\l__siunitx_table_pre_box=\box107
\l__siunitx_table_post_box=\box108
\l__siunitx_table_mantissa_box=\box109
\l__siunitx_table_result_box=\box110
\l__siunitx_table_number_align_skip=\skip64
\l__siunitx_table_text_align_skip=\skip65
 (d:/Program Files/texlive/texmf-dist/tex/latex/translator/translator.sty
Package: translator 2019-05-31 v1.12a Easy translation of strings in LaTeX
))
(d:/Program Files/texlive/texmf-dist/tex/latex/tools/bm.sty
Package: bm 2019/07/24 v1.2d Bold Symbol Support (DPC/FMi)
\symboldoperators=\mathgroup6
\symboldletters=\mathgroup7
\symboldsymbols=\mathgroup8
LaTeX Font Info:    Redeclaring math alphabet \mathbf on input line 141.
LaTeX Info: Redefining \bm on input line 209.
)
(d:/Program Files/texlive/texmf-dist/tex/latex/dblfloatfix/dblfloatfix.sty
Package: dblfloatfix 2012/12/31 v1.0a (JAW)

(d:/Program Files/texlive/texmf-dist/tex/latex/base/fixltx2e.sty
Package: fixltx2e 2016/12/29 v2.1a fixes to LaTeX (obsolete)
Applying: [2015/01/01] Old fixltx2e package on input line 46.


Package fixltx2e Warning: fixltx2e is not required with releases after 2015
(fixltx2e)                All fixes are now in the LaTeX kernel.
(fixltx2e)                See the latexrelease package for details.

Already applied: [0000/00/00] Old fixltx2e package on input line 53.
)
\@dblbotnum=\count330
\c@dblbotnumber=\count331
) (d:/Program Files/texlive/texmf-dist/tex/latex/psnfss/pifont.sty
Package: pifont 2005/04/12 PSNFSS-v9.2a Pi font support (SPQR) 
LaTeX Font Info:    Trying to load font information for U+pzd on input line 63.


(d:/Program Files/texlive/texmf-dist/tex/latex/psnfss/upzd.fd
File: upzd.fd 2001/06/04 font definitions for U/pzd.
)
LaTeX Font Info:    Trying to load font information for U+psy on input line 64.


(d:/Program Files/texlive/texmf-dist/tex/latex/psnfss/upsy.fd
File: upsy.fd 2001/06/04 font definitions for U/psy.
))
(d:/Program Files/texlive/texmf-dist/tex/latex/marvosym/marvosym.sty
Package: marvosym 2011/07/20 v2.2 Martin Vogel's Symbols font definitions
)
(d:/Program Files/texlive/texmf-dist/tex/latex/lipsum/lipsum.sty
Package: lipsum 2019/01/02 v2.2 150 paragraphs of Lorem Ipsum dummy text

(d:/Program Files/texlive/texmf-dist/tex/latex/lipsum/lipsum.ltd.tex
File: lipsum.ltd.tex 2019/01/02 v2.2 The Lorem ipsum dummy text
))
(d:/Program Files/texlive/texmf-dist/tex/latex/hyperref/hyperref.sty
Package: hyperref 2020/01/14 v7.00d Hypertext links for LaTeX

(d:/Program Files/texlive/texmf-dist/tex/generic/ltxcmds/ltxcmds.sty
Package: ltxcmds 2019/12/15 v1.24 LaTeX kernel commands for general use (HO)
)
(d:/Program Files/texlive/texmf-dist/tex/generic/iftex/iftex.sty
Package: iftex 2020/03/06 v1.0d TeX engine tests
)
(d:/Program Files/texlive/texmf-dist/tex/latex/pdftexcmds/pdftexcmds.sty
Package: pdftexcmds 2019/11/24 v0.31 Utility functions of pdfTeX for LuaTeX (HO
)

(d:/Program Files/texlive/texmf-dist/tex/generic/infwarerr/infwarerr.sty
Package: infwarerr 2019/12/03 v1.5 Providing info/warning/error messages (HO)
)
Package pdftexcmds Info: \pdf@primitive is available.
Package pdftexcmds Info: \pdf@ifprimitive is available.
Package pdftexcmds Info: \pdfdraftmode found.
)
(d:/Program Files/texlive/texmf-dist/tex/generic/kvsetkeys/kvsetkeys.sty
Package: kvsetkeys 2019/12/15 v1.18 Key value parser (HO)
)
(d:/Program Files/texlive/texmf-dist/tex/generic/kvdefinekeys/kvdefinekeys.sty
Package: kvdefinekeys 2019-12-19 v1.6 Define keys (HO)
) (d:/Program Files/texlive/texmf-dist/tex/generic/pdfescape/pdfescape.sty
Package: pdfescape 2019/12/09 v1.15 Implements pdfTeX's escape features (HO)
)
(d:/Program Files/texlive/texmf-dist/tex/latex/hycolor/hycolor.sty
Package: hycolor 2020-01-27 v1.10 Color options for hyperref/bookmark (HO)
)
(d:/Program Files/texlive/texmf-dist/tex/latex/letltxmacro/letltxmacro.sty
Package: letltxmacro 2019/12/03 v1.6 Let assignment for LaTeX macros (HO)
)
(d:/Program Files/texlive/texmf-dist/tex/latex/auxhook/auxhook.sty
Package: auxhook 2019-12-17 v1.6 Hooks for auxiliary files (HO)
)
(d:/Program Files/texlive/texmf-dist/tex/latex/kvoptions/kvoptions.sty
Package: kvoptions 2019/11/29 v3.13 Key value format for package options (HO)
)
\@linkdim=\dimen265
\Hy@linkcounter=\count332
\Hy@pagecounter=\count333

(d:/Program Files/texlive/texmf-dist/tex/latex/hyperref/pd1enc.def
File: pd1enc.def 2020/01/14 v7.00d Hyperref: PDFDocEncoding definition (HO)
Now handling font encoding PD1 ...
... no UTF-8 mapping file for font encoding PD1
)
(d:/Program Files/texlive/texmf-dist/tex/generic/intcalc/intcalc.sty
Package: intcalc 2019/12/15 v1.3 Expandable calculations with integers (HO)
)
(d:/Program Files/texlive/texmf-dist/tex/generic/etexcmds/etexcmds.sty
Package: etexcmds 2019/12/15 v1.7 Avoid name clashes with e-TeX commands (HO)
)
\Hy@SavedSpaceFactor=\count334
Package hyperref Info: Option `breaklinks' set `true' on input line 4421.


Package hyperref Warning: Option `letterpaper' is no longer used.

Package hyperref Info: Option `colorlinks' set `true' on input line 4421.
Package hyperref Info: Option `bookmarks' set `false' on input line 4421.
Package hyperref Info: Hyper figures OFF on input line 4547.
Package hyperref Info: Link nesting OFF on input line 4552.
Package hyperref Info: Hyper index ON on input line 4555.
Package hyperref Info: Plain pages OFF on input line 4562.
Package hyperref Info: Backreferencing ON on input line 4565.
Package hyperref Info: Implicit mode ON; LaTeX internals redefined.
Package hyperref Info: Bookmarks OFF on input line 4806.
(d:/Program Files/texlive/texmf-dist/tex/latex/hyperref/backref.sty
Package: backref 2020/01/14 v1.40 Bibliographical back referencing

(d:/Program Files/texlive/texmf-dist/tex/latex/rerunfilecheck/rerunfilecheck.st
y
Package: rerunfilecheck 2019/12/05 v1.9 Rerun checks for auxiliary files (HO)
 (d:/Program Files/texlive/texmf-dist/tex/latex/atveryend/atveryend.sty
Package: atveryend 2019-12-11 v1.11 Hooks at the very end of document (HO)
Package atveryend Info: \enddocument detected (standard20110627).
)
(d:/Program Files/texlive/texmf-dist/tex/generic/uniquecounter/uniquecounter.st
y
Package: uniquecounter 2019/12/15 v1.4 Provide unlimited unique counter (HO)
 (d:/Program Files/texlive/texmf-dist/tex/generic/bigintcalc/bigintcalc.sty
Package: bigintcalc 2019/12/15 v1.5 Expandable calculations on big integers (HO
)
))
Package uniquecounter Info: New unique counter `rerunfilecheck' on input line 2
86.
))
\c@Hy@tempcnt=\count335
LaTeX Info: Redefining \url on input line 5159.
\XeTeXLinkMargin=\dimen266
 (d:/Program Files/texlive/texmf-dist/tex/generic/bitset/bitset.sty
Package: bitset 2019/12/09 v1.3 Handle bit-vector datatype (HO)
)
\Fld@menulength=\count336
\Field@Width=\dimen267
\Fld@charsize=\dimen268
Package hyperref Info: Hyper figures OFF on input line 6430.
Package hyperref Info: Link nesting OFF on input line 6435.
Package hyperref Info: Hyper index ON on input line 6438.
Package hyperref Info: backreferencing ON on input line 6443.
Package hyperref Info: Link coloring ON on input line 6448.
Package hyperref Info: Link coloring with OCG OFF on input line 6455.
Package hyperref Info: PDF/A mode OFF on input line 6460.
LaTeX Info: Redefining \ref on input line 6500.
LaTeX Info: Redefining \pageref on input line 6504.

(d:/Program Files/texlive/texmf-dist/tex/generic/atbegshi/atbegshi.sty
Package: atbegshi 2019/12/05 v1.19 At begin shipout hook (HO)
)
\Hy@abspage=\count337
\c@Item=\count338
\c@Hfootnote=\count339
)
Package hyperref Info: Driver (autodetected): hpdftex.

(d:/Program Files/texlive/texmf-dist/tex/latex/hyperref/hpdftex.def
File: hpdftex.def 2020/01/14 v7.00d Hyperref driver for pdfTeX
\Fld@listcount=\count340
\c@bookmark@seq@number=\count341
\Hy@SectionHShift=\skip66
)
(d:/Program Files/texlive/texmf-dist/tex/latex/geometry/geometry.sty
Package: geometry 2020/01/02 v5.9 Page Geometry

(d:/Program Files/texlive/texmf-dist/tex/generic/iftex/ifvtex.sty
Package: ifvtex 2019/10/25 v1.7 ifvtex legacy package. Use iftex instead.
)
\Gm@cnth=\count342
\Gm@cntv=\count343
\c@Gm@tempcnt=\count344
\Gm@bindingoffset=\dimen269
\Gm@wd@mp=\dimen270
\Gm@odd@mp=\dimen271
\Gm@even@mp=\dimen272
\Gm@layoutwidth=\dimen273
\Gm@layoutheight=\dimen274
\Gm@layouthoffset=\dimen275
\Gm@layoutvoffset=\dimen276
\Gm@dimlist=\toks33
)
(./1956-supp.aux)
\openout1 = `1956-supp.aux'.

LaTeX Font Info:    Checking defaults for OML/cmm/m/it on input line 58.
LaTeX Font Info:    ... okay on input line 58.
LaTeX Font Info:    Checking defaults for OMS/cmsy/m/n on input line 58.
LaTeX Font Info:    ... okay on input line 58.
LaTeX Font Info:    Checking defaults for OT1/cmr/m/n on input line 58.
LaTeX Font Info:    ... okay on input line 58.
LaTeX Font Info:    Checking defaults for T1/cmr/m/n on input line 58.
LaTeX Font Info:    ... okay on input line 58.
LaTeX Font Info:    Checking defaults for TS1/cmr/m/n on input line 58.
LaTeX Font Info:    ... okay on input line 58.
LaTeX Font Info:    Checking defaults for OMX/cmex/m/n on input line 58.
LaTeX Font Info:    ... okay on input line 58.
LaTeX Font Info:    Checking defaults for U/cmr/m/n on input line 58.
LaTeX Font Info:    ... okay on input line 58.
LaTeX Font Info:    Checking defaults for PD1/pdf/m/n on input line 58.
LaTeX Font Info:    ... okay on input line 58.

(d:/Program Files/texlive/texmf-dist/tex/context/base/mkii/supp-pdf.mkii
[Loading MPS to PDF converter (version 2006.09.02).]
\scratchcounter=\count345
\scratchdimen=\dimen277
\scratchbox=\box111
\nofMPsegments=\count346
\nofMParguments=\count347
\everyMPshowfont=\toks34
\MPscratchCnt=\count348
\MPscratchDim=\dimen278
\MPnumerator=\count349
\makeMPintoPDFobject=\count350
\everyMPtoPDFconversion=\toks35
) (d:/Program Files/texlive/texmf-dist/tex/latex/epstopdf-pkg/epstopdf-base.sty
Package: epstopdf-base 2020-01-24 v2.11 Base part for package epstopdf
Package epstopdf-base Info: Redefining graphics rule for `.eps' on input line 4
85.
(d:/Program Files/texlive/texmf-dist/tex/latex/latexconfig/epstopdf-sys.cfg
File: epstopdf-sys.cfg 2010/07/13 v1.3 Configuration of (r)epstopdf for TeX Liv
e
))
(d:/Program Files/texlive/texmf-dist/tex/latex/translator/translator-basic-dict
ionary-English.dict
Dictionary: translator-basic-dictionary, Language: English 
)
(d:/Program Files/texlive/texmf-dist/tex/latex/siunitx/siunitx-abbreviations.cf
g
File: siunitx-abbreviations.cfg 2017/11/26 v2.7k siunitx: Abbreviated units
)
\AtBeginShipoutBox=\box112
Package hyperref Info: Link coloring ON on input line 58.
 (d:/Program Files/texlive/texmf-dist/tex/latex/hyperref/nameref.sty
Package: nameref 2019/09/16 v2.46 Cross-referencing by name of section

(d:/Program Files/texlive/texmf-dist/tex/latex/refcount/refcount.sty
Package: refcount 2019/12/15 v3.6 Data extraction from label references (HO)
)
(d:/Program Files/texlive/texmf-dist/tex/generic/gettitlestring/gettitlestring.
sty
Package: gettitlestring 2019/12/15 v1.6 Cleanup title references (HO)
)
\c@section@level=\count351
)
LaTeX Info: Redefining \ref on input line 58.
LaTeX Info: Redefining \pageref on input line 58.
LaTeX Info: Redefining \nameref on input line 58.

*geometry* driver: auto-detecting
*geometry* detected driver: pdftex
*geometry* verbose mode - [ preamble ] result:
* driver: pdftex
* paper: custom
* layout: <same size as paper>
* layoutoffset:(h,v)=(0.0pt,0.0pt)
* modes: twoside 
* h-part:(L,W,R)=(34.1433pt, 347.12361pt, 34.14333pt)
* v-part:(T,H,B)=(34.1433pt, 549.13818pt, 34.14331pt)
* \paperwidth=415.41023pt
* \paperheight=617.42479pt
* \textwidth=347.12361pt
* \textheight=549.13818pt
* \oddsidemargin=-38.1267pt
* \evensidemargin=-38.12666pt
* \topmargin=-66.1267pt
* \headheight=12.0pt
* \headsep=16.0pt
* \topskip=10.0pt
* \footskip=30.0pt
* \marginparwidth=90.0pt
* \marginparsep=11.0pt
* \columnsep=10.0pt
* \skip\footins=9.0pt plus 4.0pt minus 2.0pt
* \hoffset=0.0pt
* \voffset=0.0pt
* \mag=1000
* \@twocolumnfalse
* \@twosidetrue
* \@mparswitchtrue
* \@reversemarginfalse
* (1in=72.27pt=25.4mm, 1cm=28.453pt)

LaTeX Font Info:    Trying to load font information for U+msa on input line 58.

(d:/Program Files/texlive/texmf-dist/tex/latex/amsfonts/umsa.fd
File: umsa.fd 2013/01/14 v3.01 AMS symbols A
)
LaTeX Font Info:    Trying to load font information for U+msb on input line 58.


(d:/Program Files/texlive/texmf-dist/tex/latex/amsfonts/umsb.fd
File: umsb.fd 2013/01/14 v3.01 AMS symbols B
)
LaTeX Font Info:    Trying to load font information for U+mvs on input line 79.


(d:/Program Files/texlive/texmf-dist/tex/latex/marvosym/umvs.fd)
Overfull \hbox (1.56558pt too wide) in paragraph at lines 99--100
\OT1/cmr/m/it/10 ellipsoid-shaped \OT1/cmr/m/n/10 3D Gaus-sian dis-tri-bu-tion 
for pseudo \OT1/cmr/m/it/10 soft \OT1/cmr/m/n/10 fore-ground groundtruth
 []

[1


{d:/Program Files/texlive/texmf-var/fonts/map/pdftex/updmap/pdftex.map}]
<figs/result1.pdf, id=43, 1830.83093pt x 956.6129pt>
File: figs/result1.pdf Graphic file (type pdf)
<use figs/result1.pdf>
Package pdftex.def Info: figs/result1.pdf  used on input line 112.
(pdftex.def)             Requested size: 343.65428pt x 179.55423pt.
LaTeX Font Info:    Font shape `OT1/cmtt/bx/n' in size <12> not available
(Font)              Font shape `OT1/cmtt/m/n' tried instead on input line 117.
<figs/result_annotation.pdf, id=45, 1422.49338pt x 1529.81241pt>
File: figs/result_annotation.pdf Graphic file (type pdf)
<use figs/result_annotation.pdf>
Package pdftex.def Info: figs/result_annotation.pdf  used on input line 125.
(pdftex.def)             Requested size: 312.40912pt x 335.9762pt.

[2 <./figs/result1.pdf>]
<figs/result_car.pdf, id=87, 1818.23994pt x 441.20134pt>
File: figs/result_car.pdf Graphic file (type pdf)
<use figs/result_car.pdf>
Package pdftex.def Info: figs/result_car.pdf  used on input line 143.
(pdftex.def)             Requested size: 343.65428pt x 83.3848pt.
<figs/result_Pedestrian.pdf, id=88, 1822.82005pt x 438.14803pt>
File: figs/result_Pedestrian.pdf Graphic file (type pdf)
<use figs/result_Pedestrian.pdf>
Package pdftex.def Info: figs/result_Pedestrian.pdf  used on input line 150.
(pdftex.def)             Requested size: 343.65428pt x 82.60048pt.
 [3 <./figs/result_annotation.pdf>] (./1956-supp.bbl
(./1956-supp.brf)
\tf@brf=\write3
\openout3 = `1956-supp.brf'.

)
Package atveryend Info: Empty hook `BeforeClearDocument' on input line 162.
 [4 <./figs/result_car.pdf> <./figs/result_Pedestrian.pdf

pdfTeX warning: pdflatex.exe (file ./figs/result_Pedestrian.pdf): PDF inclusion
: multiple pdfs with page group included in a single page
>]
Package atveryend Info: Empty hook `AfterLastShipout' on input line 162.
 (./1956-supp.aux)
Package atveryend Info: Executing hook `AtVeryEndDocument' on input line 162.
Package atveryend Info: Executing hook `AtEndAfterFileList' on input line 162.


Package rerunfilecheck Warning: File `1956-supp.brf' has changed.
(rerunfilecheck)                Rerun to get bibliographical references right.

Package rerunfilecheck Info: Checksums for `1956-supp.brf':
(rerunfilecheck)             Before: 23003E8F44EDEB7F18744F156F48AB8B;87
(rerunfilecheck)             After:  1166146B7AD9962DD0FF3B933A213499;85.
Package atveryend Info: Empty hook `AtVeryVeryEnd' on input line 162.
 ) 
Here is how much of TeX's memory you used:
 12415 strings out of 480608
 220355 string characters out of 5903087
 582007 words of memory out of 5000000
 28014 multiletter control sequences out of 15000+600000
 548388 words of font info for 82 fonts, out of 8000000 for 9000
 1141 hyphenation exceptions out of 8191
 47i,9n,46p,1500b,716s stack positions out of 5000i,500n,10000p,200000b,80000s
{d:/Program Files/texlive/texmf-dist/fonts/enc/dvips/cm-super/cm-super-ts1.en
c}<d:/Program Files/texlive/texmf-dist/fonts/type1/public/amsfonts/cm/cmbx10.pf
b><d:/Program Files/texlive/texmf-dist/fonts/type1/public/amsfonts/cm/cmbx12.pf
b><d:/Program Files/texlive/texmf-dist/fonts/type1/public/amsfonts/cm/cmbx9.pfb
><d:/Program Files/texlive/texmf-dist/fonts/type1/public/amsfonts/cm/cmbxti10.p
fb><d:/Program Files/texlive/texmf-dist/fonts/type1/public/amsfonts/cm/cmmi10.p
fb><d:/Program Files/texlive/texmf-dist/fonts/type1/public/amsfonts/cm/cmmi7.pf
b><d:/Program Files/texlive/texmf-dist/fonts/type1/public/amsfonts/cm/cmr10.pfb
><d:/Program Files/texlive/texmf-dist/fonts/type1/public/amsfonts/cm/cmr6.pfb><
d:/Program Files/texlive/texmf-dist/fonts/type1/public/amsfonts/cm/cmr7.pfb><d:
/Program Files/texlive/texmf-dist/fonts/type1/public/amsfonts/cm/cmr9.pfb><d:/P
rogram Files/texlive/texmf-dist/fonts/type1/public/amsfonts/cm/cmsy10.pfb><d:/P
rogram Files/texlive/texmf-dist/fonts/type1/public/amsfonts/cm/cmti10.pfb><d:/P
rogram Files/texlive/texmf-dist/fonts/type1/public/amsfonts/cm/cmti9.pfb><d:/Pr
ogram Files/texlive/texmf-dist/fonts/type1/public/amsfonts/cm/cmtt10.pfb><d:/Pr
ogram Files/texlive/texmf-dist/fonts/type1/public/amsfonts/cm/cmtt12.pfb><d:/Pr
ogram Files/texlive/texmf-dist/fonts/type1/public/amsfonts/cm/cmtt9.pfb><d:/Pro
gram Files/texlive/texmf-dist/fonts/type1/public/marvosym/marvosym.pfb><d:/Prog
ram Files/texlive/texmf-dist/fonts/type1/public/cm-super/sfrm1000.pfb>
Output written on 1956-supp.pdf (4 pages, 5635220 bytes).
PDF statistics:
 275 PDF objects out of 1000 (max. 8388607)
 139 compressed objects within 2 object streams
 19 named destinations out of 1000 (max. 500000)
 21 words of extra memory for PDF output out of 10000 (max. 10000000)
