# Supplementary material
Source: ML conference proceedings conference paper supplement (https://www.ecva.net/papers/eccv_2020/papers_ECCV/html/123580511_ECCV_2020_paper.php)
Supplement: Supplementary file 7 [file 123580511-supp.zip › 1956-supp/egbib.bib]

@INPROCEEDINGS{KITTI,
author={Andreas Geiger and Philip Lenz and Raquel Urtasun},
booktitle={CVPR},
title={Are we ready for autonomous driving? {}The {KITTI} vision benchmark suite},
year={2012},
}

@inproceedings{he2017mask,
  title={Mask r-cnn},
  author={He, Kaiming and Gkioxari, Georgia and Doll{\'a}r, Piotr and Girshick, Ross},
  booktitle={ICCV},
  year={2017}
}

@article{wang2019apolloscape,
  title={The apolloscape open dataset for autonomous driving and its application},
  author={Wang, Peng and Huang, Xinyu and Cheng, Xinjing and Zhou, Dingfu and Geng, Qichuan and Yang, Ruigang},
  journal={IEEE TPAMI},
  year={2019},
}

@inproceedings{chen2019hybrid,
	title={Hybrid task cascade for instance segmentation},
	author={Chen, Kai and Pang, Jiangmiao and Wang, Jiaqi and Xiong, Yu and Li, Xiaoxiao and Sun, Shuyang and Feng, Wansen and Liu, Ziwei and Shi, Jianping and Ouyang, Wanli and others},
	booktitle={CVPR},
	year={2019}
}

@inproceedings{cai2018cascade,
	title={Cascade {R-CNN}: Delving into high quality object detection},
	author={Cai, Zhaowei and Vasconcelos, Nuno},
	booktitle={CVPR},
	year={2018}
}

@Misc{Supervisely,
howpublished = {\url{https://medium.com/deep-systems/releasing-first-online-3d-point-cloud-labeling-tool-in-supervisely-4faca42b5d6e}},
}

@inproceedings{xie2016semantic,
  title={Semantic instance annotation of street scenes by {3D} to {2D} label transfer},
  author={Xie, Jun and Kiefel, Martin and Sun, Ming-Ting and Geiger, Andreas},
  booktitle={CVPR},
  pages={3688--3697},
  year={2016}
}

@InProceedings{Shi_2019_CVPR,
author = {Shi, Shaoshuai and Wang, Xiaogang and Li, Hongsheng},
title = {{PointRCNN}: {3D} Object Proposal Generation and Detection From Point Cloud},
booktitle = {CVPR},
year = {2019}
}

@InProceedings{Chen_2019_ICCV,
author = {Chen, Yilun and Liu, Shu and Shen, Xiaoyong and Jia, Jiaya},
title = {Fast Point {R-CNN}},
booktitle = {ICCV},
year = {2019}
}

@InProceedings{Lang_2019_CVPR,
author = {Lang, Alex H. and Vora, Sourabh and Caesar, Holger and Zhou, Lubing and Yang, Jiong and Beijbom, Oscar},
title = {PointPillars: Fast Encoders for Object Detection From Point Clouds},
booktitle = {CVPR},
year = {2019}
}

@INPROCEEDINGS{Xiaozhi2015,
author={Chen, Xiaozhi and  Kaustav Kundu and  Yukun Zhu and  Andrew G. Berneshawi and  Huimin Ma and  Sanja Fidler and Raquel Urtasun},
booktitle={NeurIPS},
title={{3D} object proposals for accurate object class detection},
year={2015},
}

@InProceedings{Lin_2017_ICCV,
author = {Lin, Tsung-Yi and Goyal, Priya and Girshick, Ross and He, Kaiming and Dollar, Piotr},
title = {Focal Loss for Dense Object Detection},
booktitle = {ICCV},
year = {2017}
}


@article{reed2014training,
  title={Training deep neural networks on noisy labels with bootstrapping},
  author={Reed, Scott and Lee, Honglak and Anguelov, Dragomir and Szegedy, Christian and Erhan, Dumitru and Rabinovich, Andrew},
  journal={arXiv preprint arXiv:1412.6596},
  year={2014}
}

@InProceedings{Song_2015_CVPR,
author = {Song, Shuran and Lichtenberg, Samuel P. and Xiao, Jianxiong},
title = {{SUN RGB-D}: A {RGB-D} Scene Understanding Benchmark Suite},
booktitle = {CVPR},
year = {2015}
}


@InProceedings{Yang_2019_ICCV,
author = {Yang, Zetong and Sun, Yanan and Liu, Shu and Shen, Xiaoyong and Jia, Jiaya},
title = {{STD}: Sparse-to-Dense {3D} Object Detector for Point Cloud},
booktitle = {ICCV},
year = {2019}
}

@INPROCEEDINGS{qi2017,
author={Qi, Charles Ruizhongtai and Li Yi and Hao Su and Leonidas J. Guibas},
booktitle={NeurIPS},
title={Pointnet++: Deep hierarchical feature learning on point sets in a metric space},
year={2017},
}


@INPROCEEDINGS{Maturana2015,
author={Maturana, Daniel and Sebastian Scherer},
booktitle={IROS},
title={Voxnet: A {3D} convolutional neural network for real-time object recognition},
year={2015},
}

@InProceedings{Qi_2017_CVPR,
author = {Qi, Charles R. and Su, Hao and Mo, Kaichun and Guibas, Leonidas J.},
title = {PointNet: Deep Learning on Point Sets for {3D} Classification and Segmentation},
booktitle = {CVPR},
year = {2017}
}


@InProceedings{Wu_2015_CVPR,
author = {Wu, Zhirong and Song, Shuran and Khosla, Aditya and Yu, Fisher and Zhang, Linguang and Tang, Xiaoou and Xiao, Jianxiong},
title = {{3D} ShapeNets: A Deep Representation for Volumetric Shapes},
booktitle = {CVPR},
year = {2015}
}


@InProceedings{Mottaghi_2015_CVPR,
author = {Mottaghi, Roozbeh and Xiang, Yu and Savarese, Silvio},
title = {A Coarse-to-Fine Model for {3D} Pose Estimation and Sub-Category Recognition},
booktitle = {CVPR},
year = {2015}
}

@InProceedings{Chabot_2017_CVPR,
author = {Chabot, Florian and Chaouch, Mohamed and Rabarisoa, Jaonary and Teuliere, Celine and Chateau, Thierry},
title = {Deep {MANTA}: A Coarse-To-Fine Many-Task Network for Joint {2D} and {3D} Vehicle Analysis From Monocular Image},
booktitle = {CVPR},
year = {2017}
}

@article{Shi_2019_part,
  title={From Points to Parts: 3D Object Detection from Point Cloud with Part-aware and Part-aggregation Network},
  author={Shi, Shaoshuai and Wang, Zhe and Shi, Jianping  and Wang, Xiaogang and Li, Hongsheng},
  journal={IEEE TPAMI},
  year={2020}
}

@InProceedings{Li_2019_CVPR,
author = {Li, Buyu and Ouyang, Wanli and Sheng, Lu and Zeng, Xingyu and Wang, Xiaogang},
title = {{GS3D}: An Efficient {3D} Object Detection Framework for Autonomous Driving},
booktitle = {CVPR},
year = {2019}
}

@inproceedings{lee2018leveraging,
  title={Leveraging Pre-Trained {3D} Object Detection Models For Fast Ground Truth Generation},
  author={Lee, Jungwook and Walsh, Sean and Harakeh, Ali and Waslander, Steven L},
  booktitle={ITSC},
  pages={2504--2510},
  year={2018},
}
@article{zakharov2019autolabeling,
  title={Autolabeling {3D} Objects with Differentiable Rendering of {SDF} Shape Priors},
  author={Zakharov, Sergey and Kehl, Wadim and Bhargava, Arjun and Gaidon, Adrien},
  journal={arXiv preprint arXiv:1911.11288},
  year={2019}
}

@InProceedings{Li2016VehicleDF,
  title={Vehicle Detection from {3D} {Lidar} Using Fully Convolutional Network},
  author={Bo Li and Tianlei Zhang and Tian Xia},
  booktitle = {Robotics: Science and Systems},
  year={2016},
}

@InProceedings{Chen_2016_CVPR,
author = {Chen, Xiaozhi and Kundu, Kaustav and Zhang, Ziyu and Ma, Huimin and Fidler, Sanja and Urtasun, Raquel},
title = {Monocular {3D} Object Detection for Autonomous Driving},
booktitle = {CVPR},
year = {2016}
}


@InProceedings{Xiang_2015_CVPR,
author = {Xiang, Yu and Choi, Wongun and Lin, Yuanqing and Savarese, Silvio},
title = {Data-Driven {3D} Voxel Patterns for Object Category Recognition},
booktitle = {CVPR},
year = {2015}
}

@InProceedings{Mousavian_2017_CVPR,
author = {Mousavian, Arsalan and Anguelov, Dragomir and Flynn, John and Kosecka, Jana},
title = {{3D} Bounding Box Estimation Using Deep Learning and Geometry},
booktitle = {CVPR},
year = {2017}
}

@inproceedings{rethage2018eccv,
  author  =  {Rethage, Dario and Wald, Johanna and Sturm, Jurgen and Navab, Nassir and Tombari, Federico},
  title   =  {Fully-Convolutional Point Networks for Large-Scale Point Clouds},
  booktitle =  {ECCV},
  year    =  {2018}
}

@InProceedings{Yang_2018_CVPR,
author = {Yang, Bin and Luo, Wenjie and Urtasun, Raquel},
title = {PIXOR: Real-Time {3D} Object Detection From Point Clouds},
booktitle = {CVPR},
year = {2018}
}


@InProceedings{Qi_2018_CVPR,
author = {Qi, Charles R. and Liu, Wei and Wu, Chenxia and Su, Hao and Guibas, Leonidas J.},
title = {Frustum PointNets for {3D} Object Detection From {RGB-D} Data},
booktitle = {CVPR},
year = {2018}
}

@InProceedings{Liang_2019_CVPR,
author = {Liang, Ming and Yang, Bin and Chen, Yun and Hu, Rui and Urtasun, Raquel},
title = {Multi-Task Multi-Sensor Fusion for {3D} Object Detection},
booktitle = {CVPR},
year = {2019}
}

@InProceedings{Liang_2018_ECCV,
author = {Liang, Ming and Yang, Bin and Wang, Shenlong and Urtasun, Raquel},
title = {Deep Continuous Fusion for Multi-Sensor {3D} Object Detection},
booktitle = {ECCV},
year = {2018}
}

@InProceedings{Su_2015_ICCV,
author = {Su, Hang and Maji, Subhransu and Kalogerakis, Evangelos and Learned-Miller, Erik},
title = {Multi-View Convolutional Neural Networks for {3D} Shape Recognition},
booktitle = {ICCV},
year = {2015}
}

@InProceedings{Zhou_2018_CVPR,
author = {Zhou, Yin and Tuzel, Oncel},
title = {VoxelNet: End-to-End Learning for Point Cloud Based {3D} Object Detection},
booktitle = {CVPR},
year = {2018}
}

@InProceedings{Qi_2016_CVPR,
author = {Qi, Charles R. and Su, Hao and Niessner, Matthias and Dai, Angela and Yan, Mengyuan and Guibas, Leonidas J.},
title = {Volumetric and Multi-View CNNs for Object Classification on {3D} Data},
booktitle = {CVPR},
year = {2016}
}

@InProceedings{Chen_2017_CVPR,
author = {Chen, Xiaozhi and Ma, Huimin and Wan, Ji and Li, Bo and Xia, Tian},
title = {Multi-View {3D} Object Detection Network for Autonomous Driving},
booktitle = {CVPR},
year = {2017}
}

@article{Yan2018,
  title={SECOND: Sparsely Embedded Convolutional Detection},
  author={Yan, Yan and Mao, Yuxing and Li, Bo},
  journal={Sensors},
  year={ 2018},
}

@article{Liu_2019_AAAI,
	title={TANet: Robust 3D Object Detection from Point Clouds with Triple Attention},
	author={Liu, Zhe and Zhao, Xin and Huang, Tengteng and Hu, Ruolan and Zhou, Yu and Bai, Xiang},
	journal={AAAI},
	year={2020}
}

@article{Chen_2019,
	title={Object as Hotspots: An Anchor-Free 3D Object Detection Approach via Firing of Hotspots},
	author={Chen, Qi and Sun, Lin and Wang, Zhixin and Jia, Kui and Yuille, Alan},
	journal={arXiv preprint arXiv:1912.12791},
	year={2019}
}
