# Supplementary material
Source: ML conference proceedings conference paper supplement (https://www.ecva.net/papers/eccv_2020/papers_ECCV/html/123580511_ECCV_2020_paper.php)

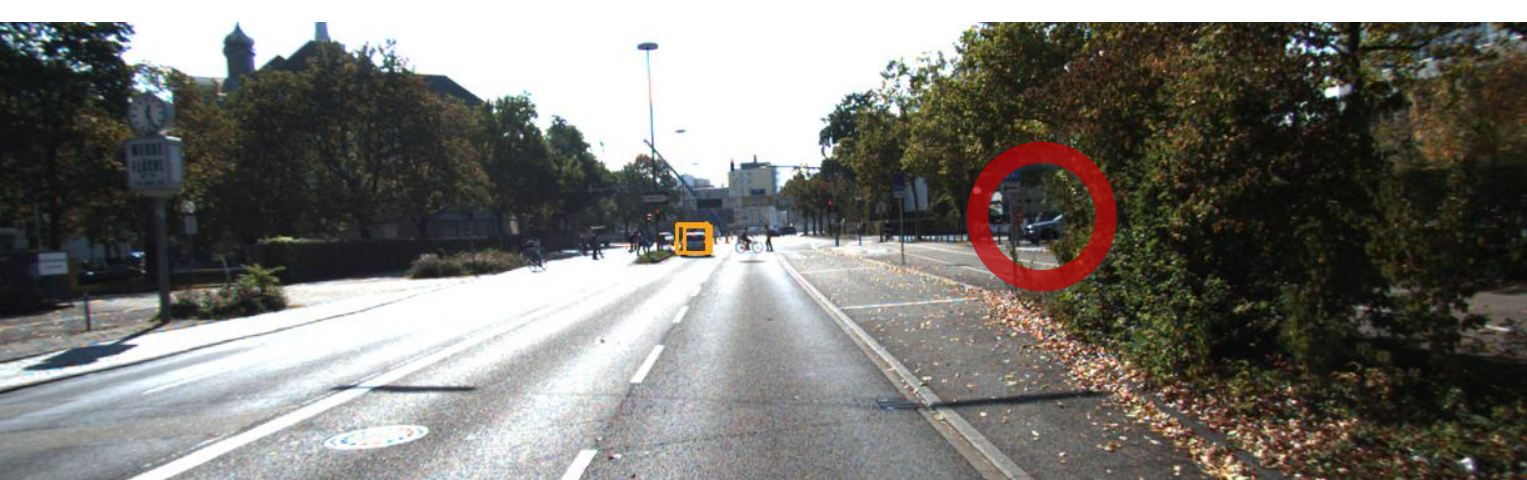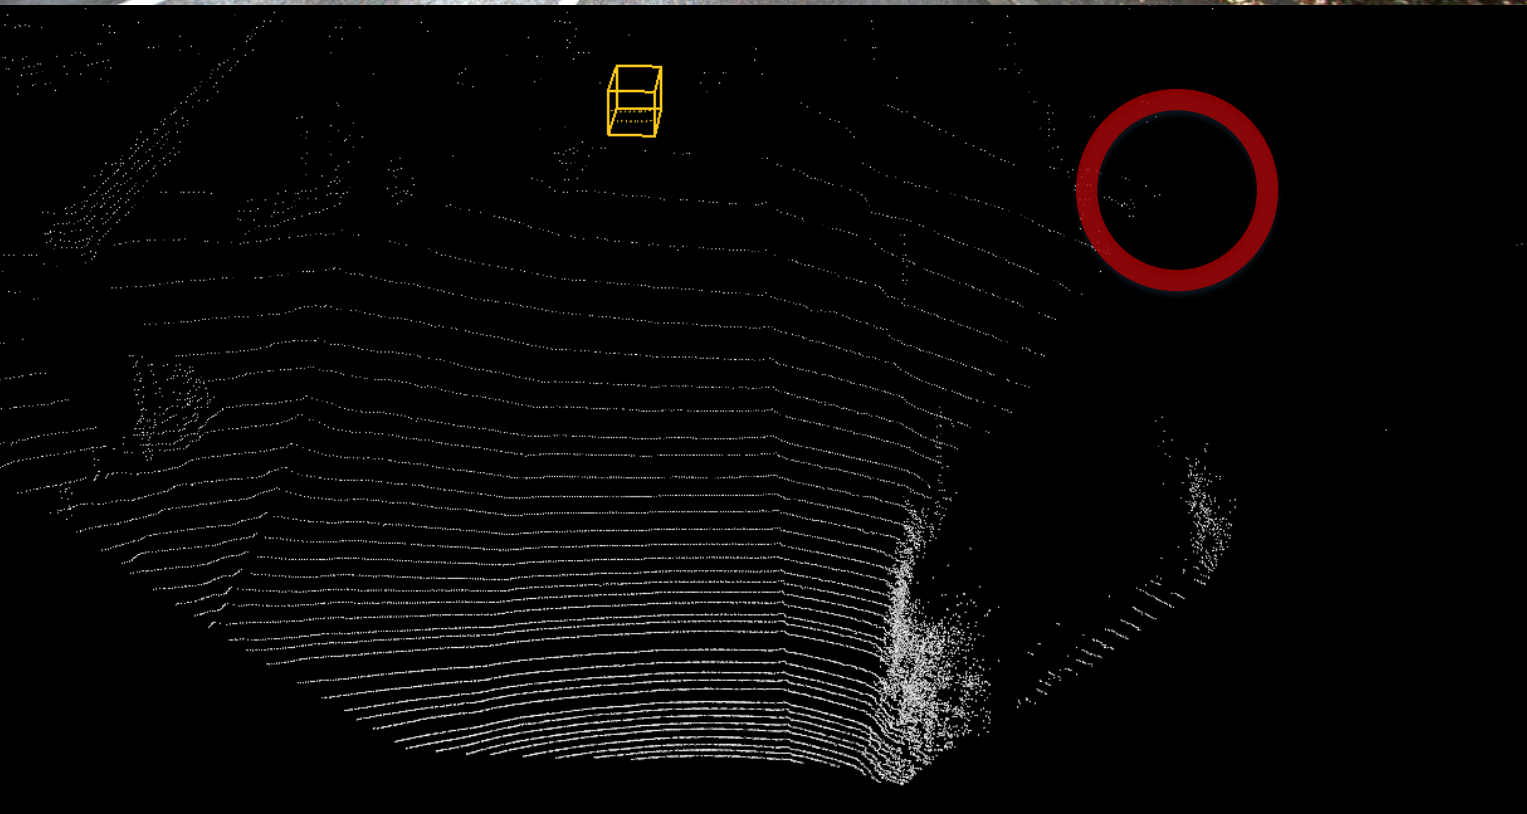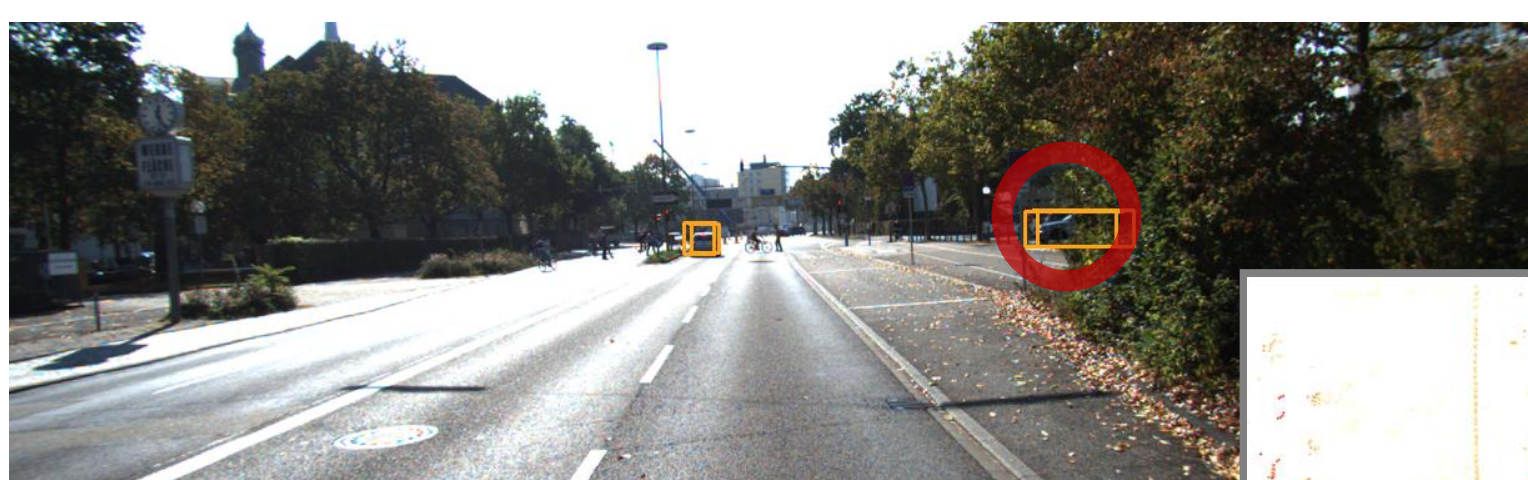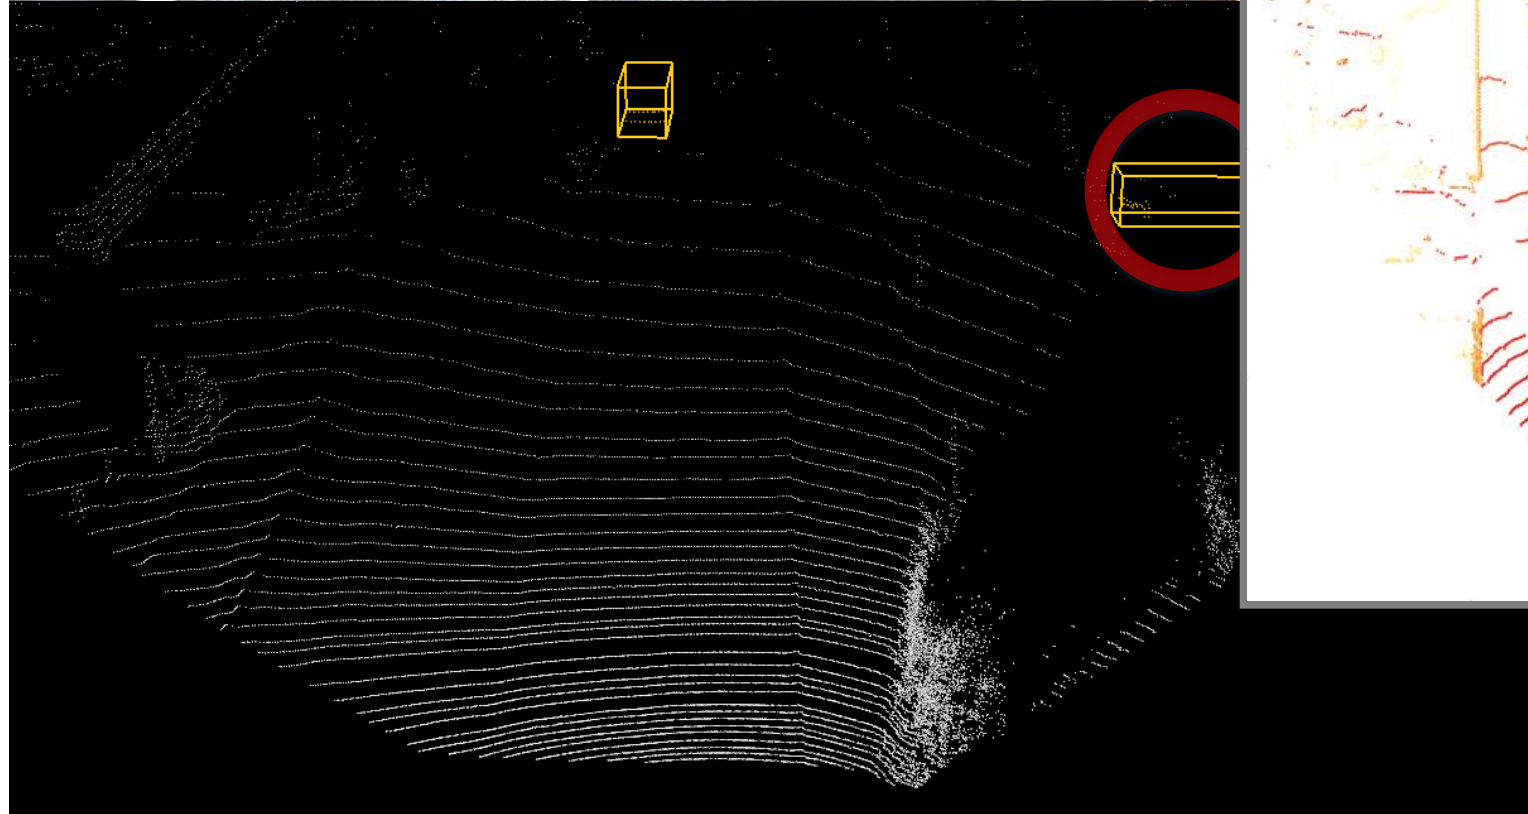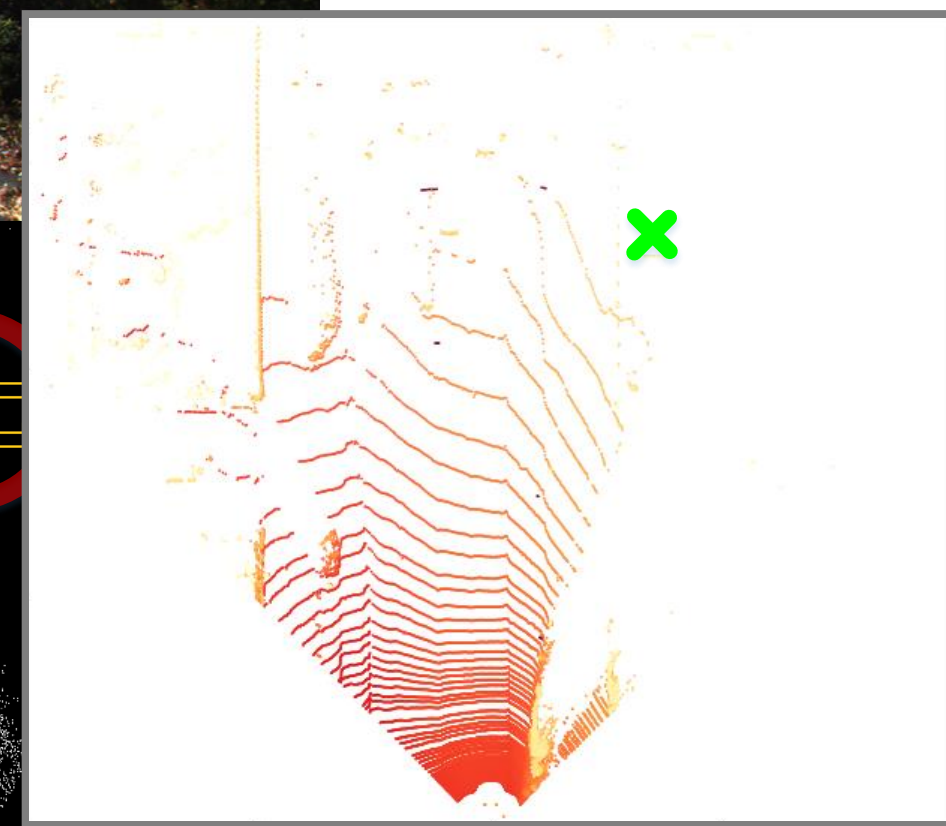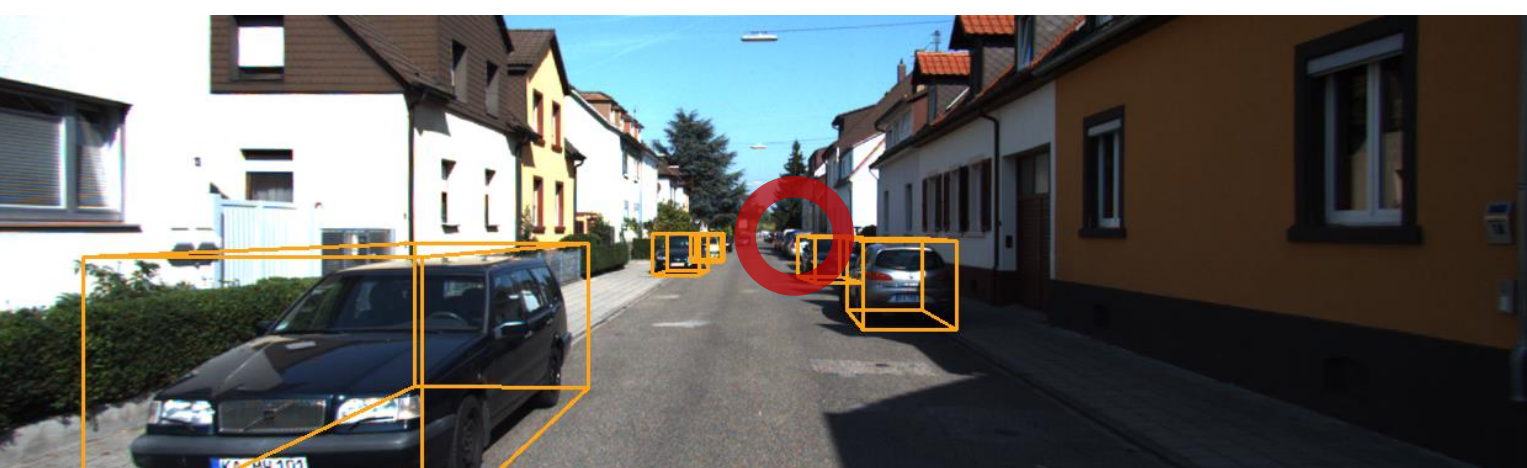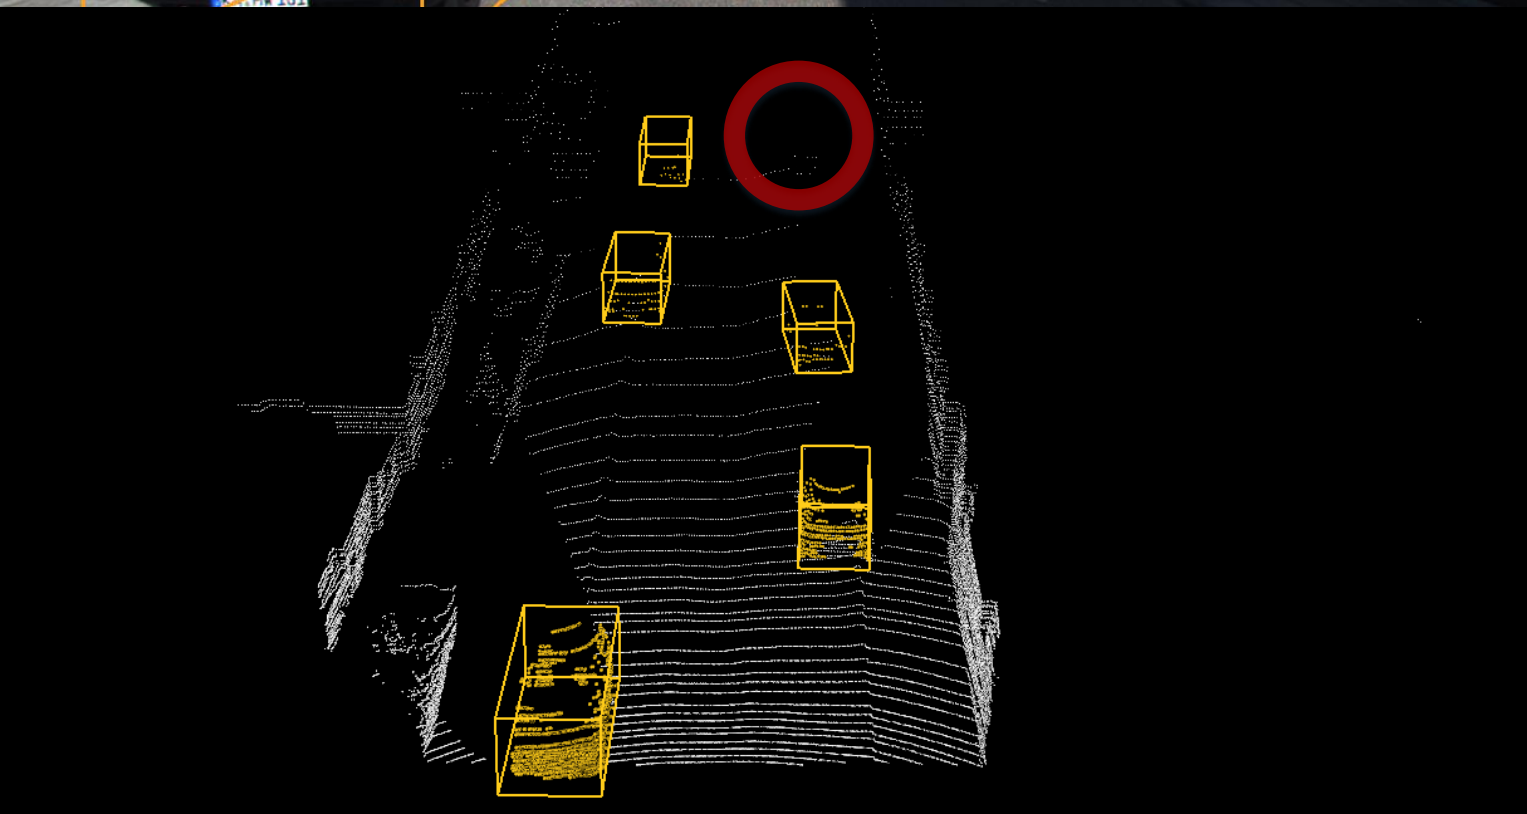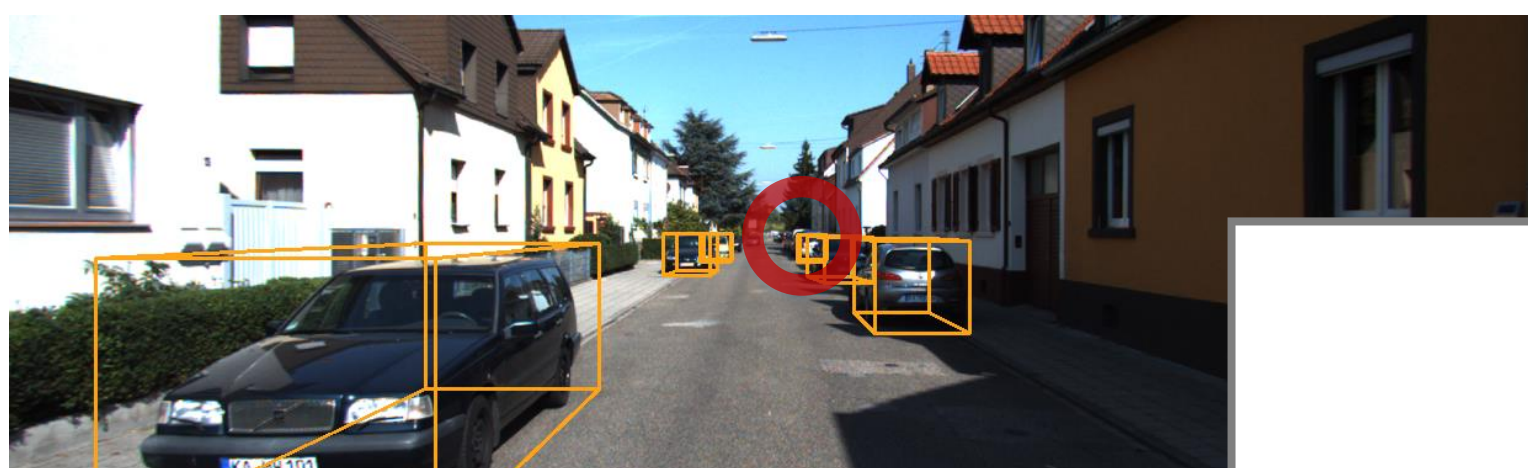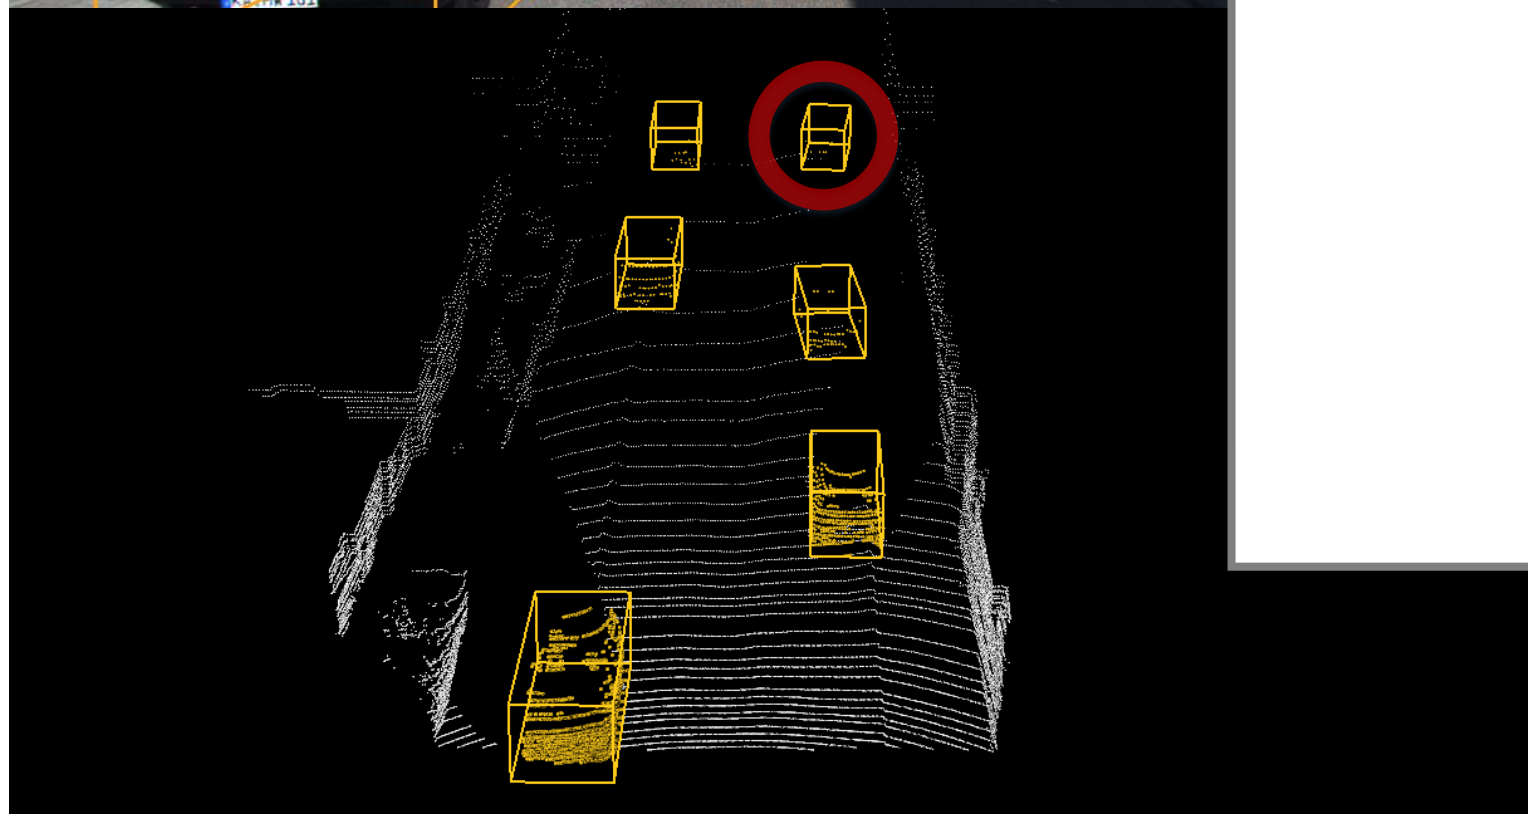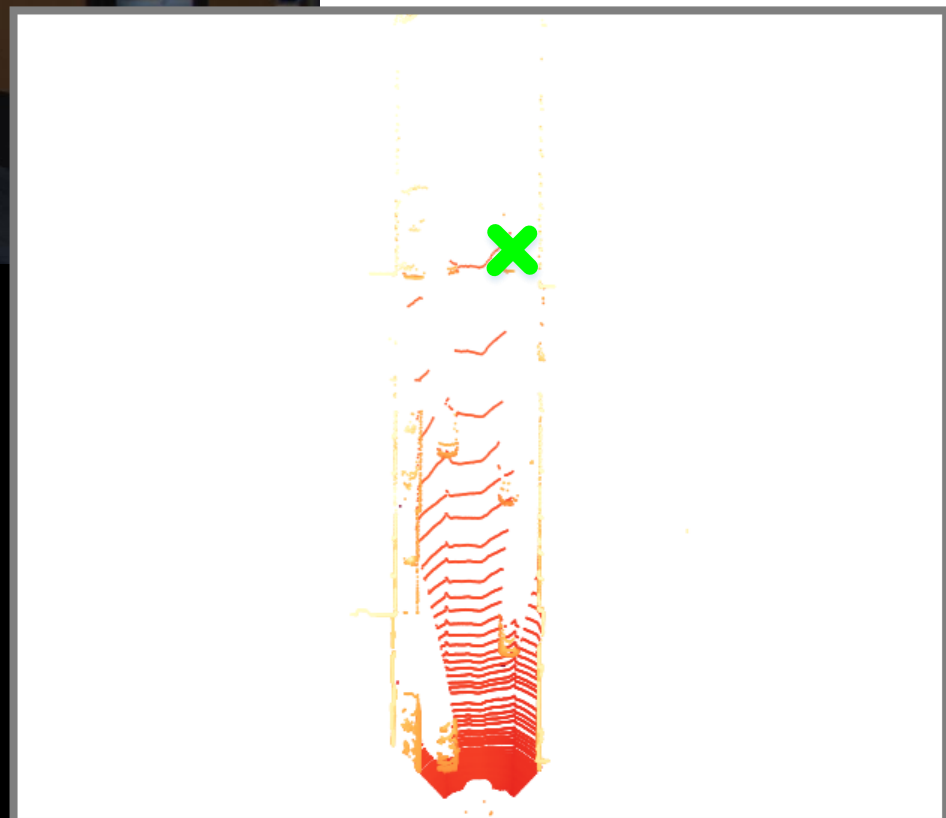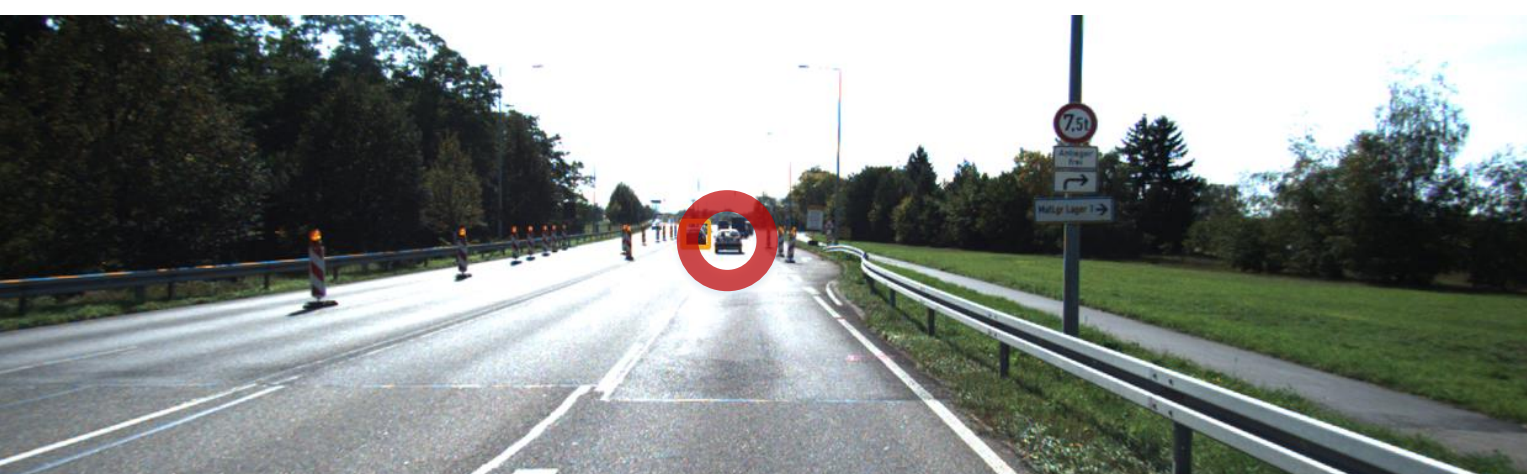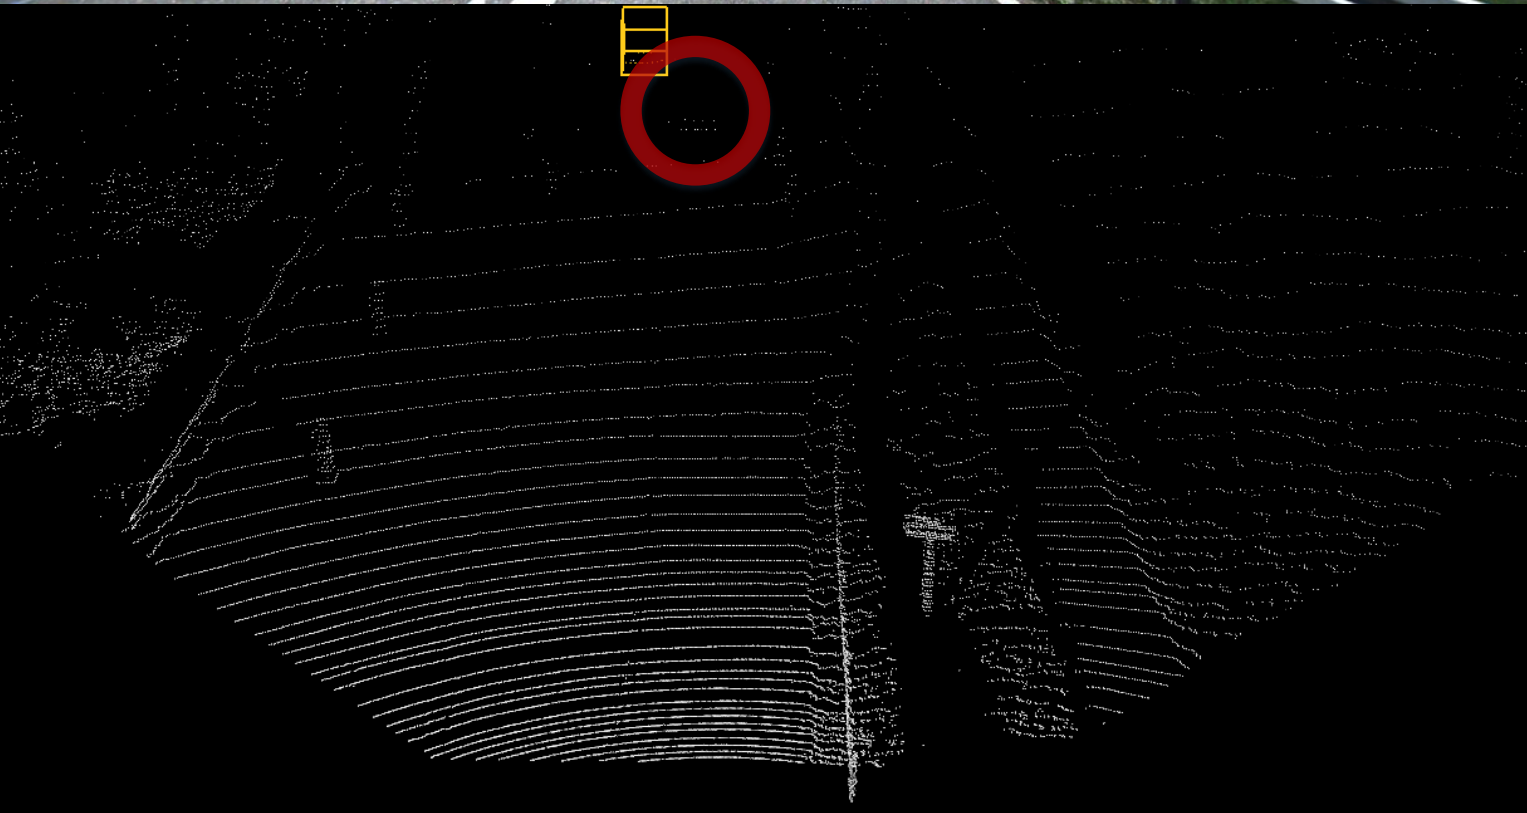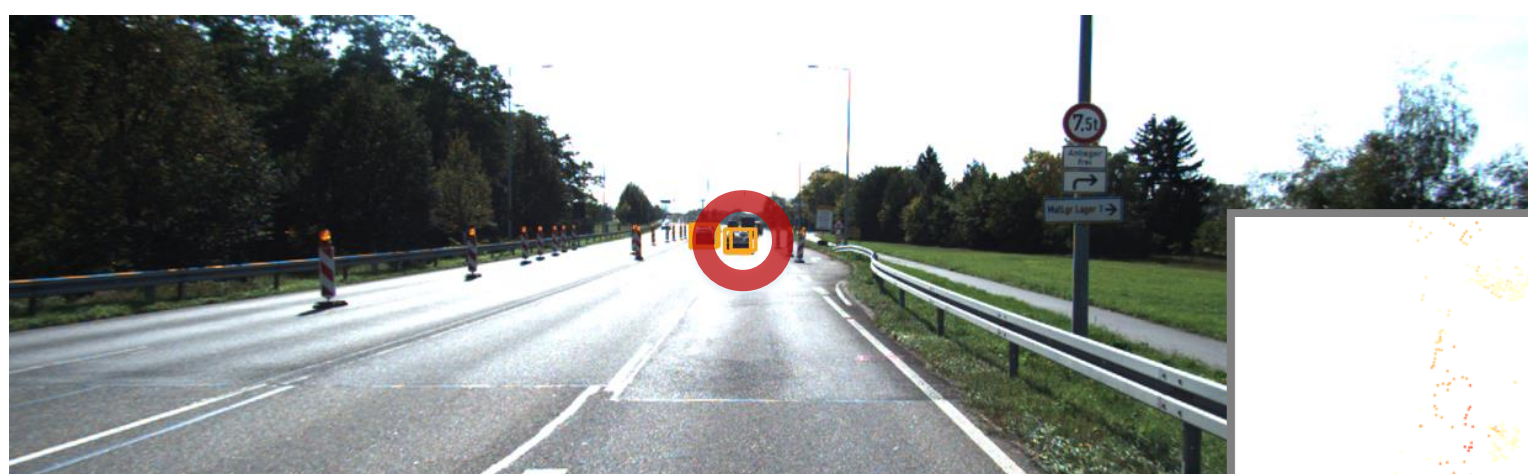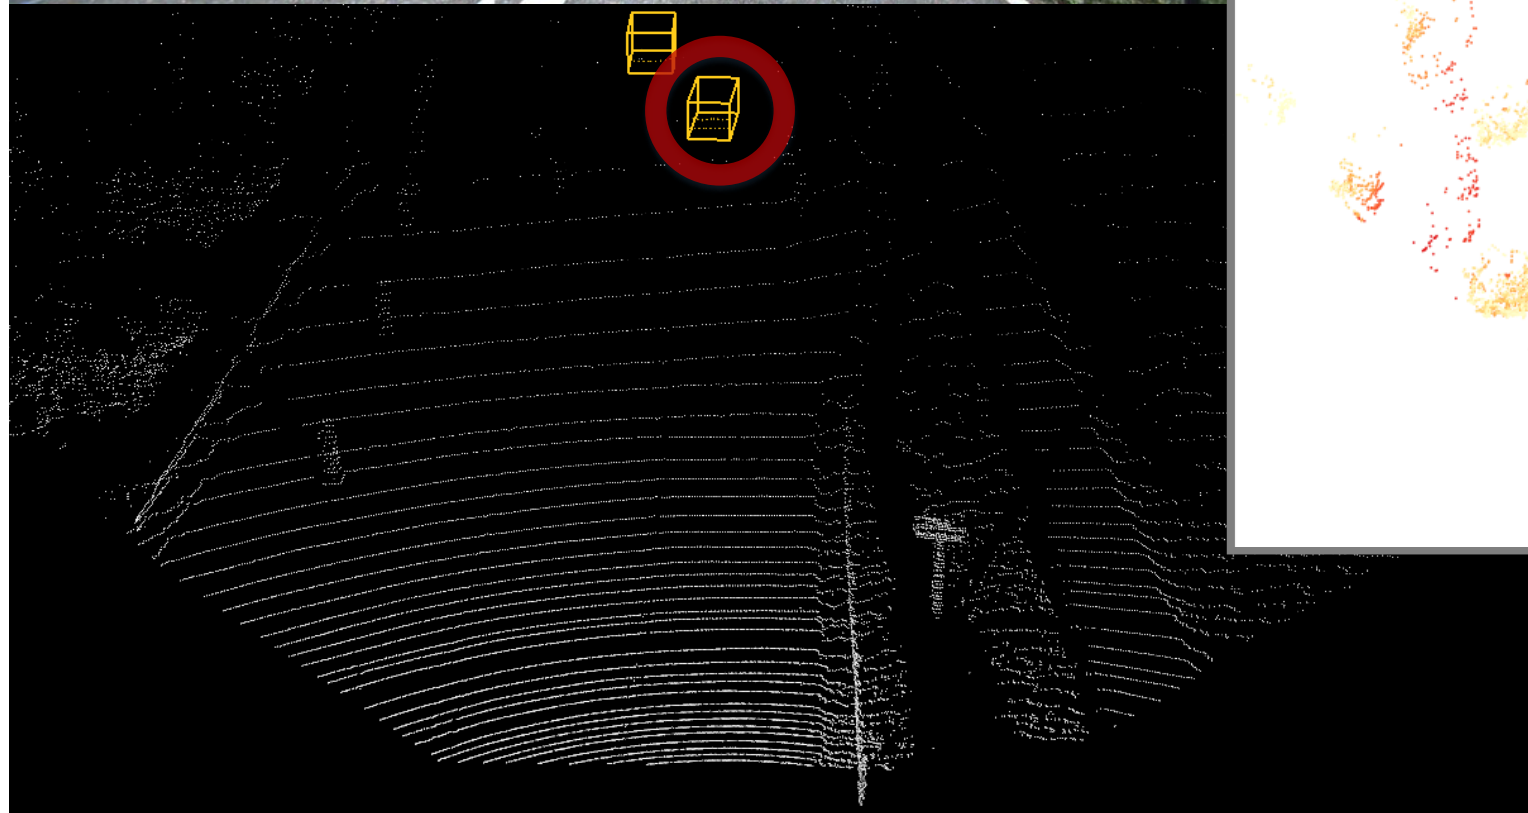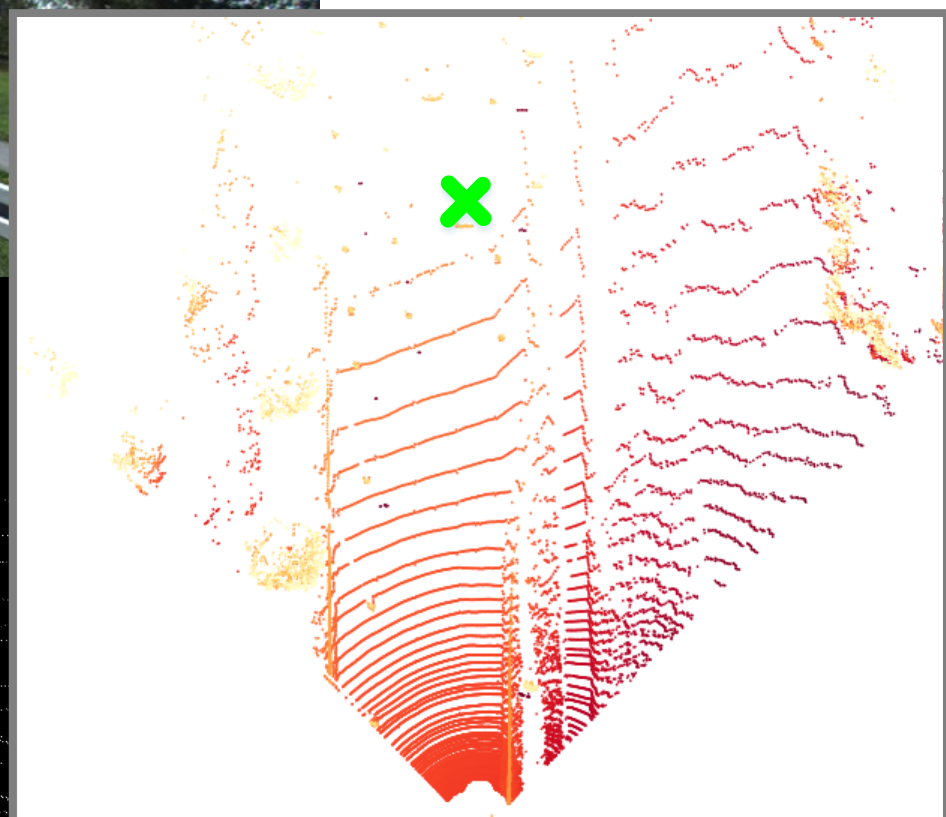

Automatic Mode

Active Mode

BEV Map

Supplement: Supplementary file 1 [file 123580511-supp.zip]

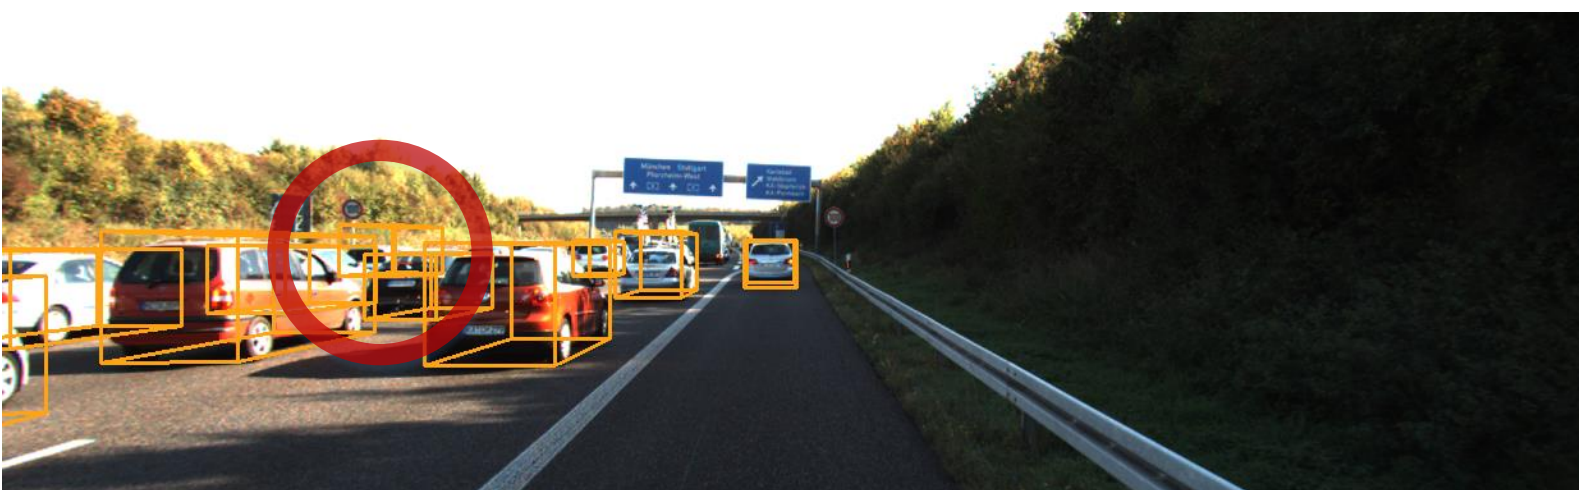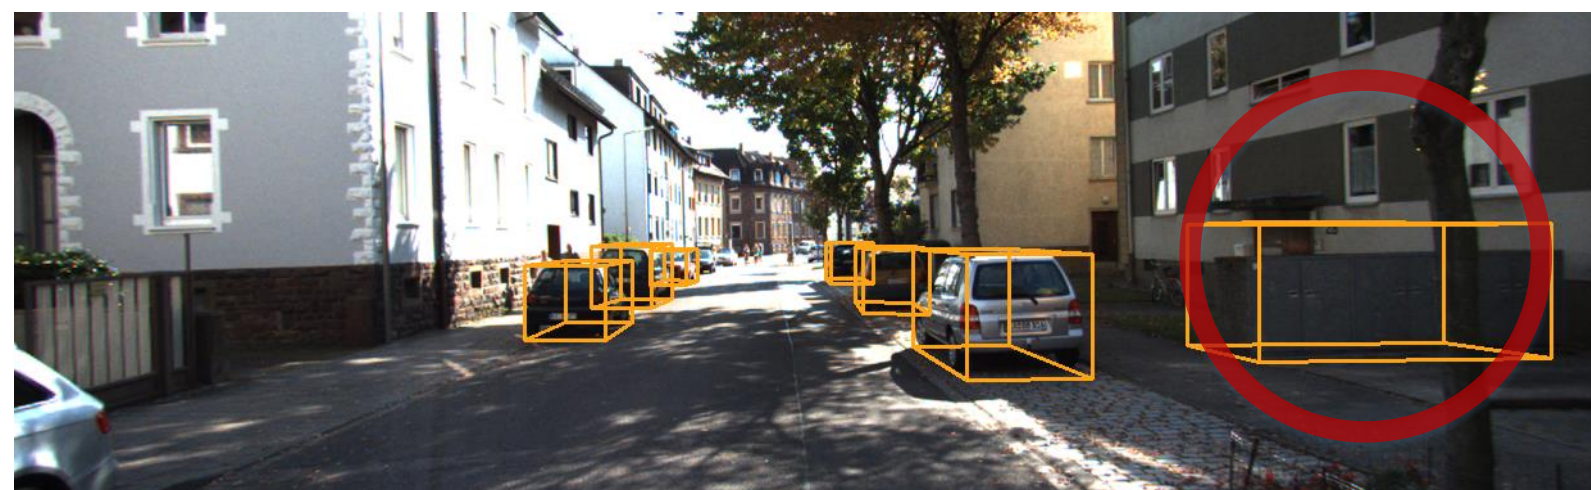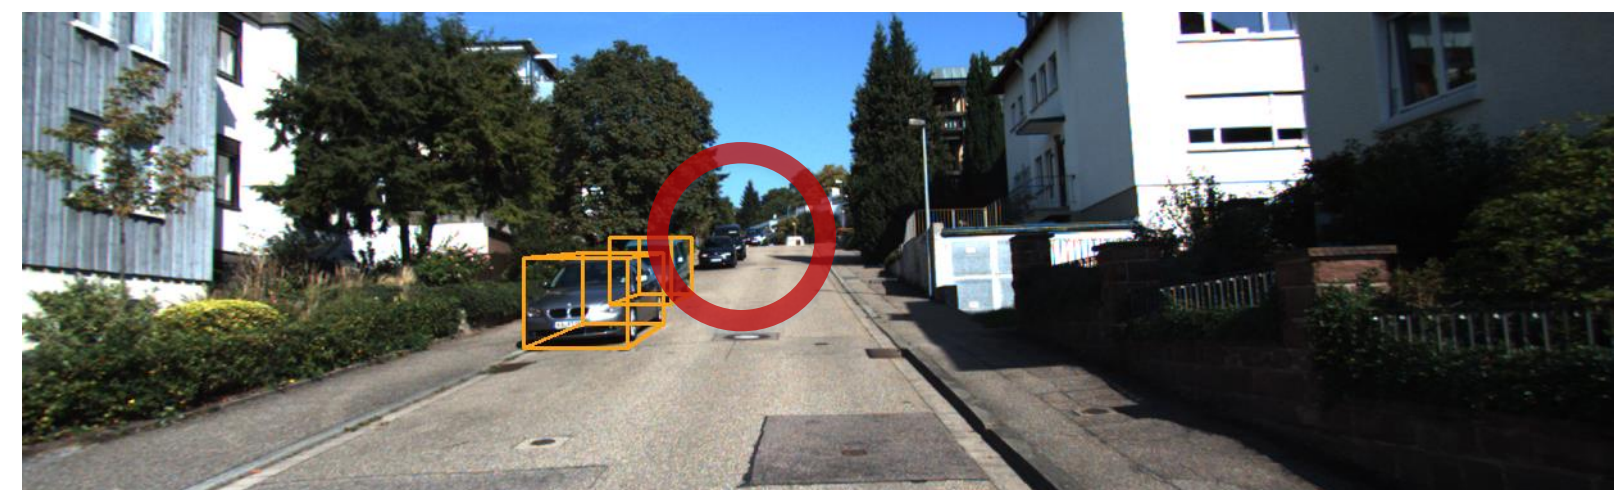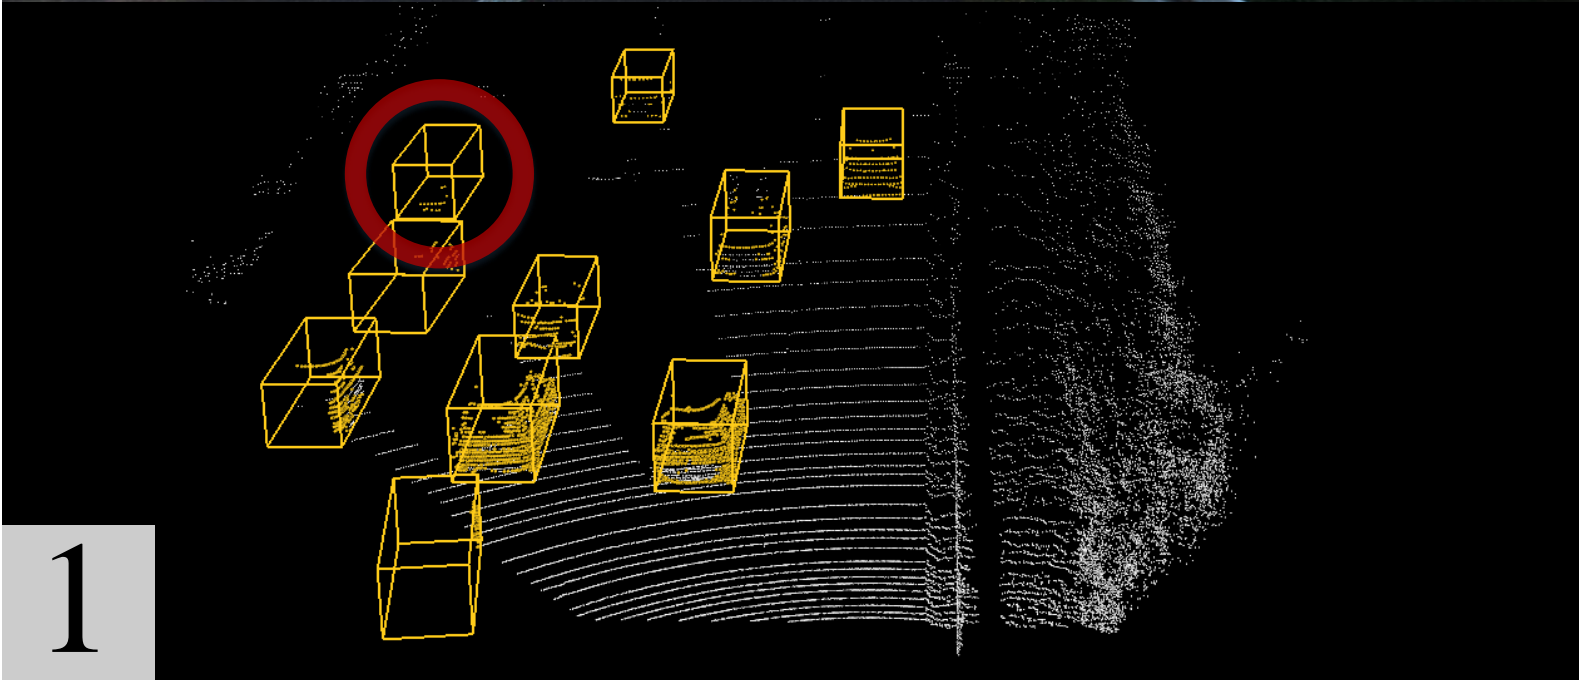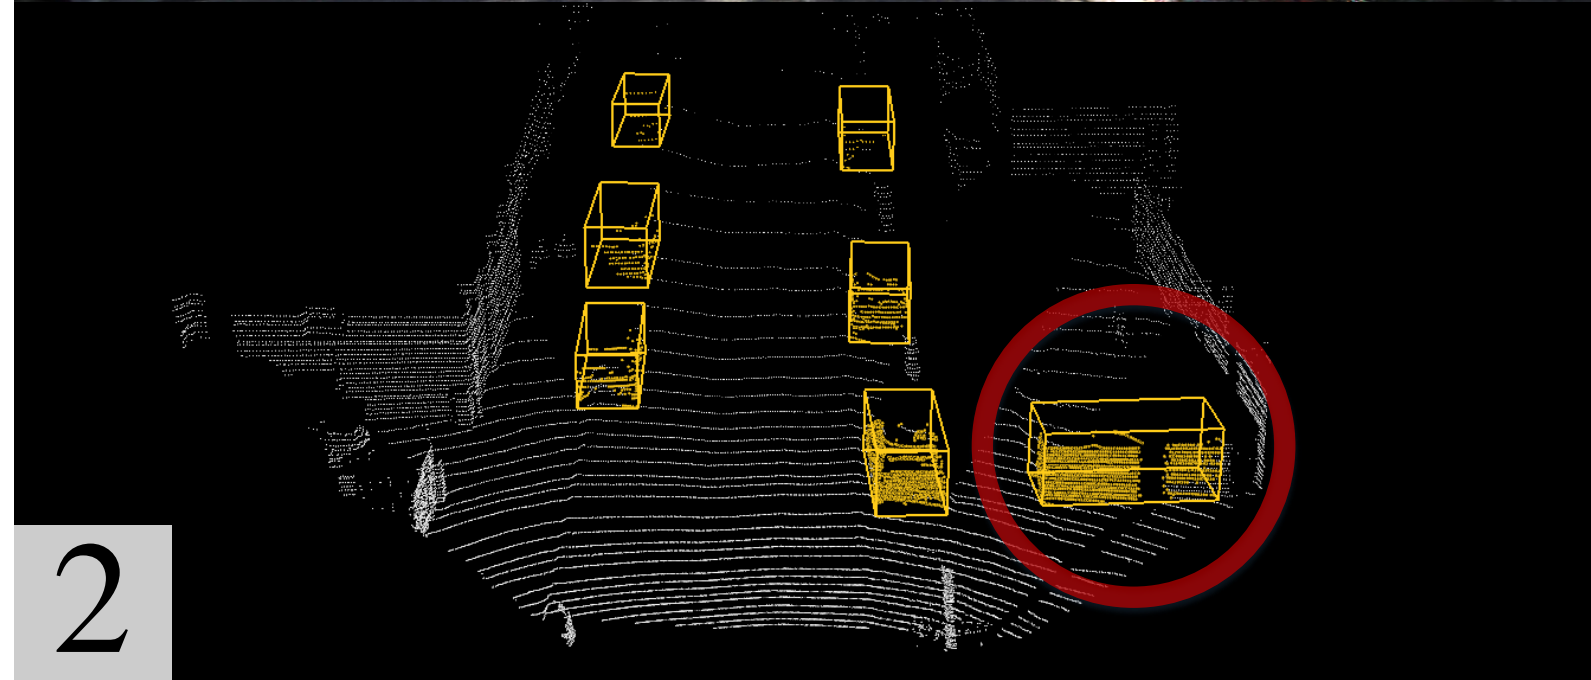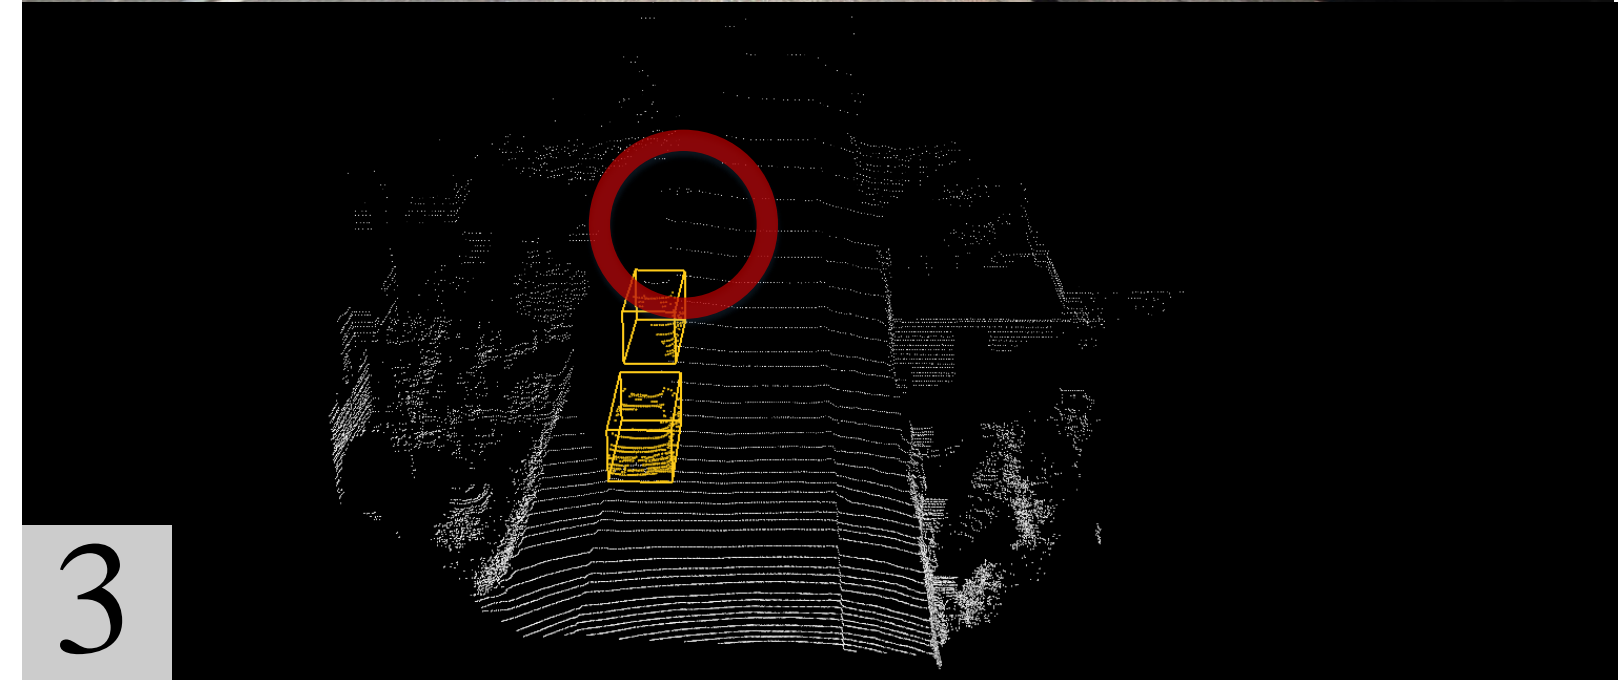

Supplement: Supplementary file 2 [file 123580511-supp.zip]

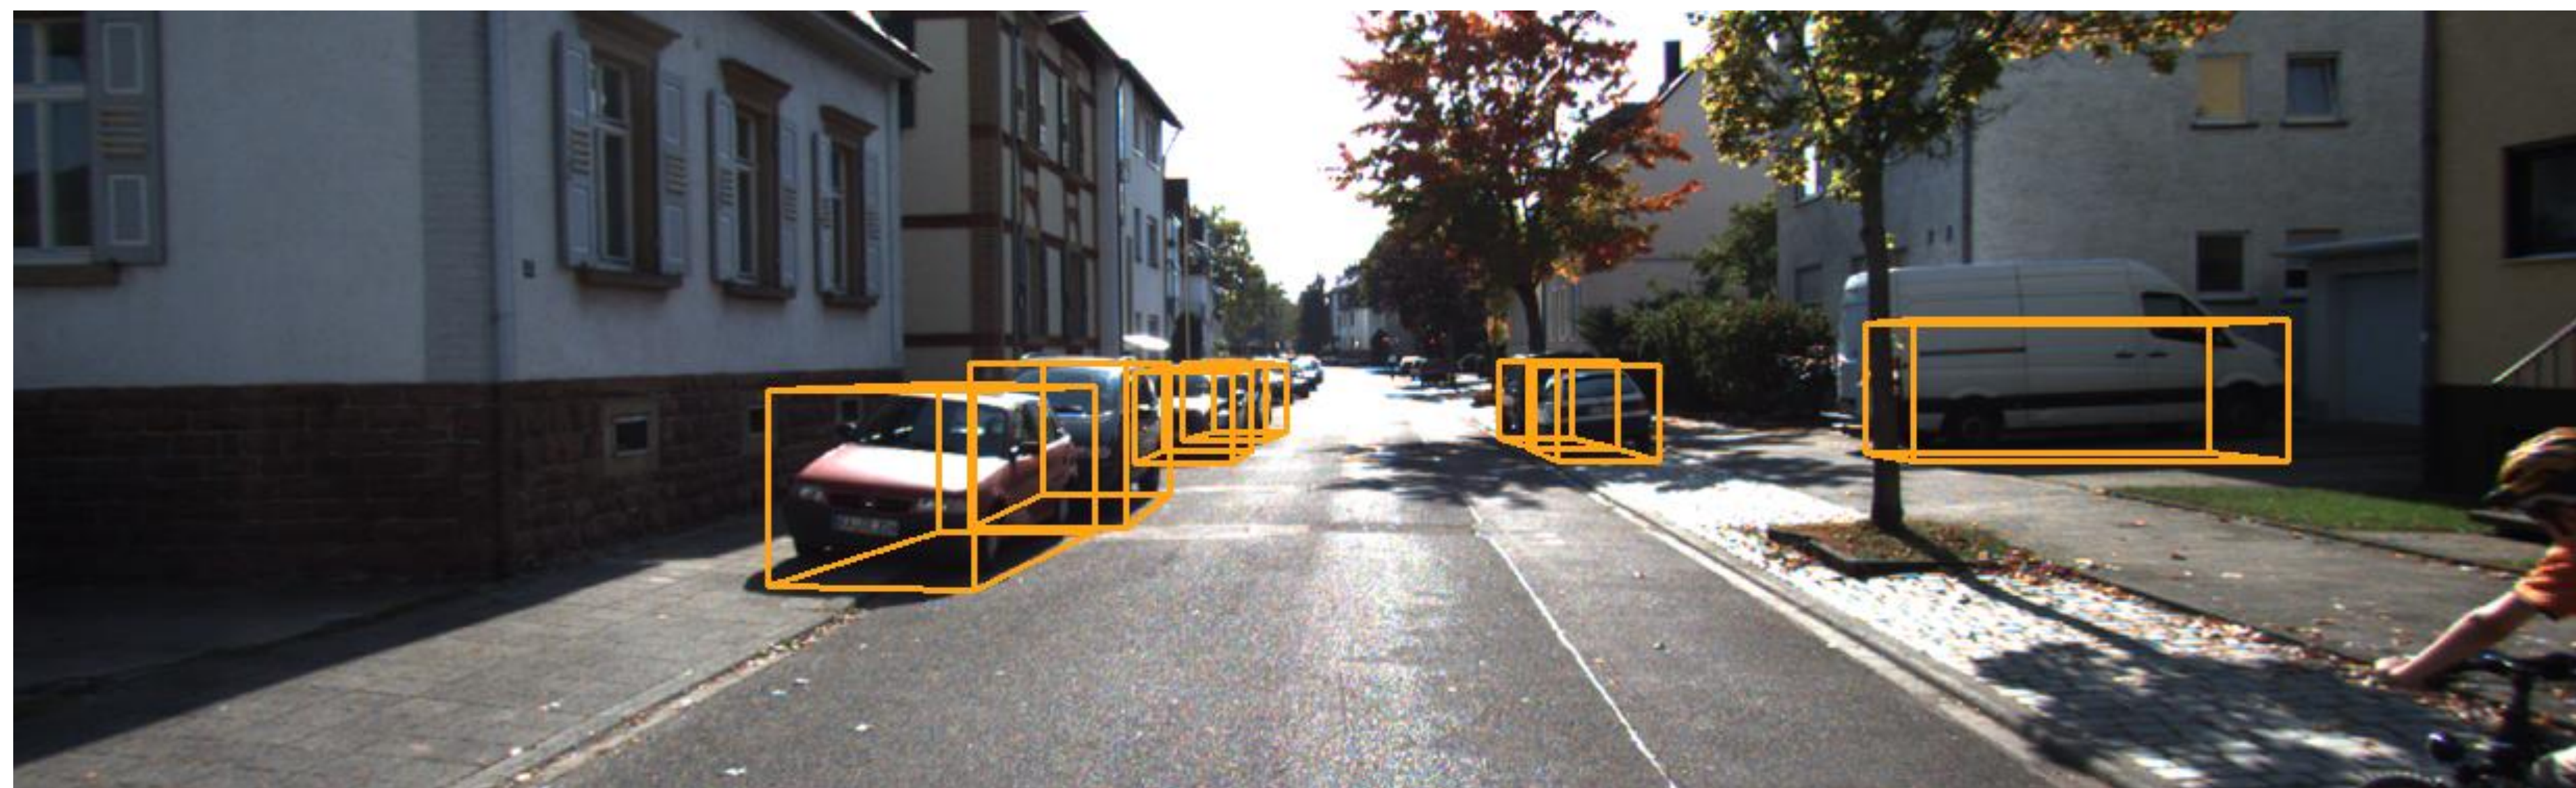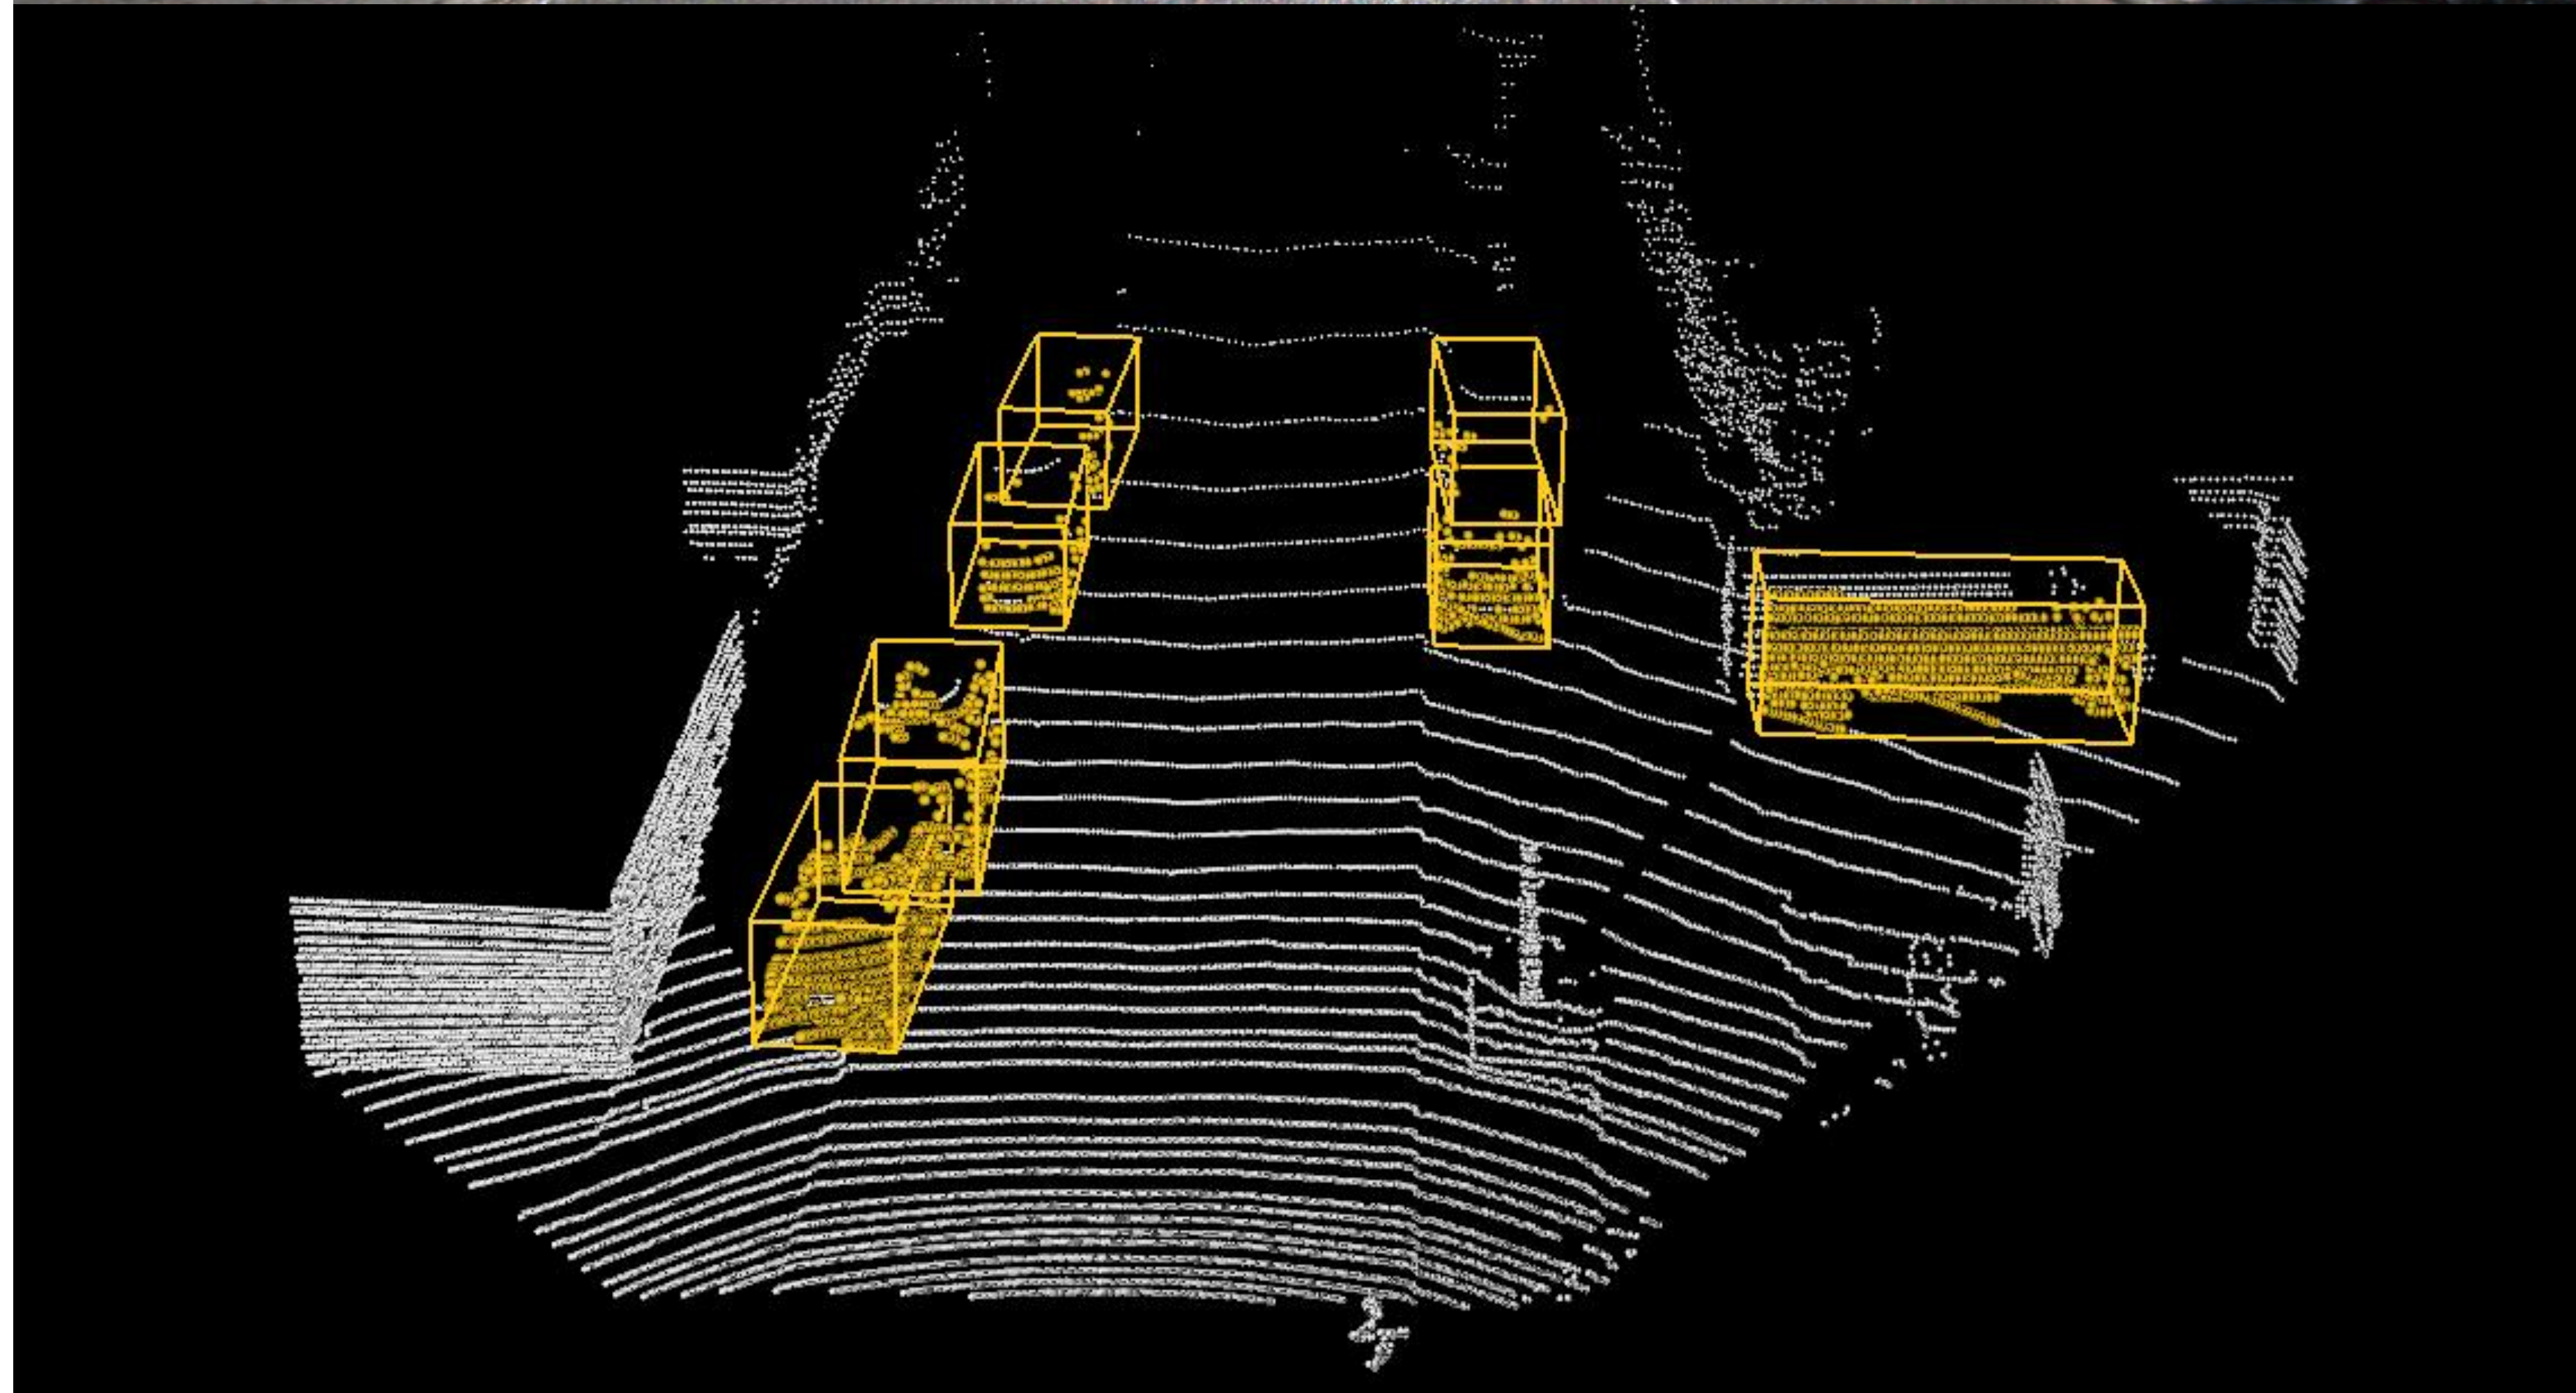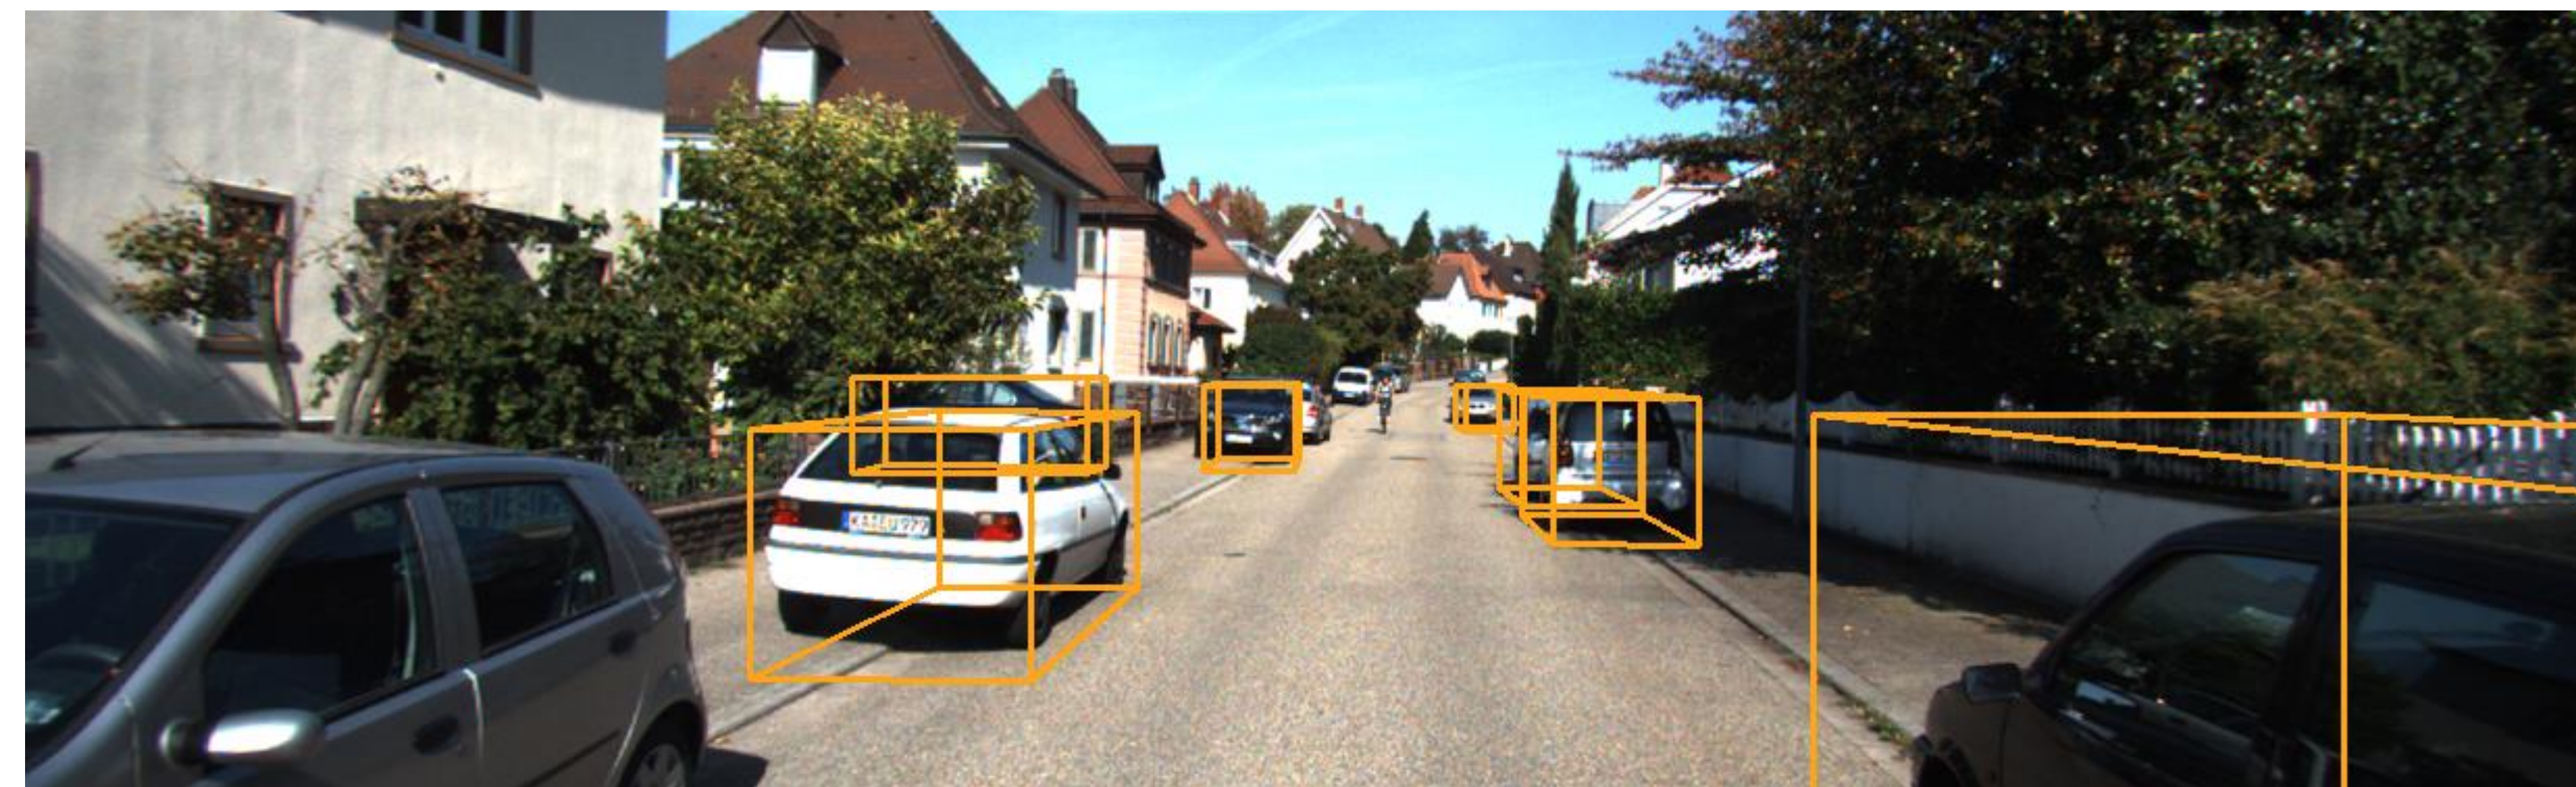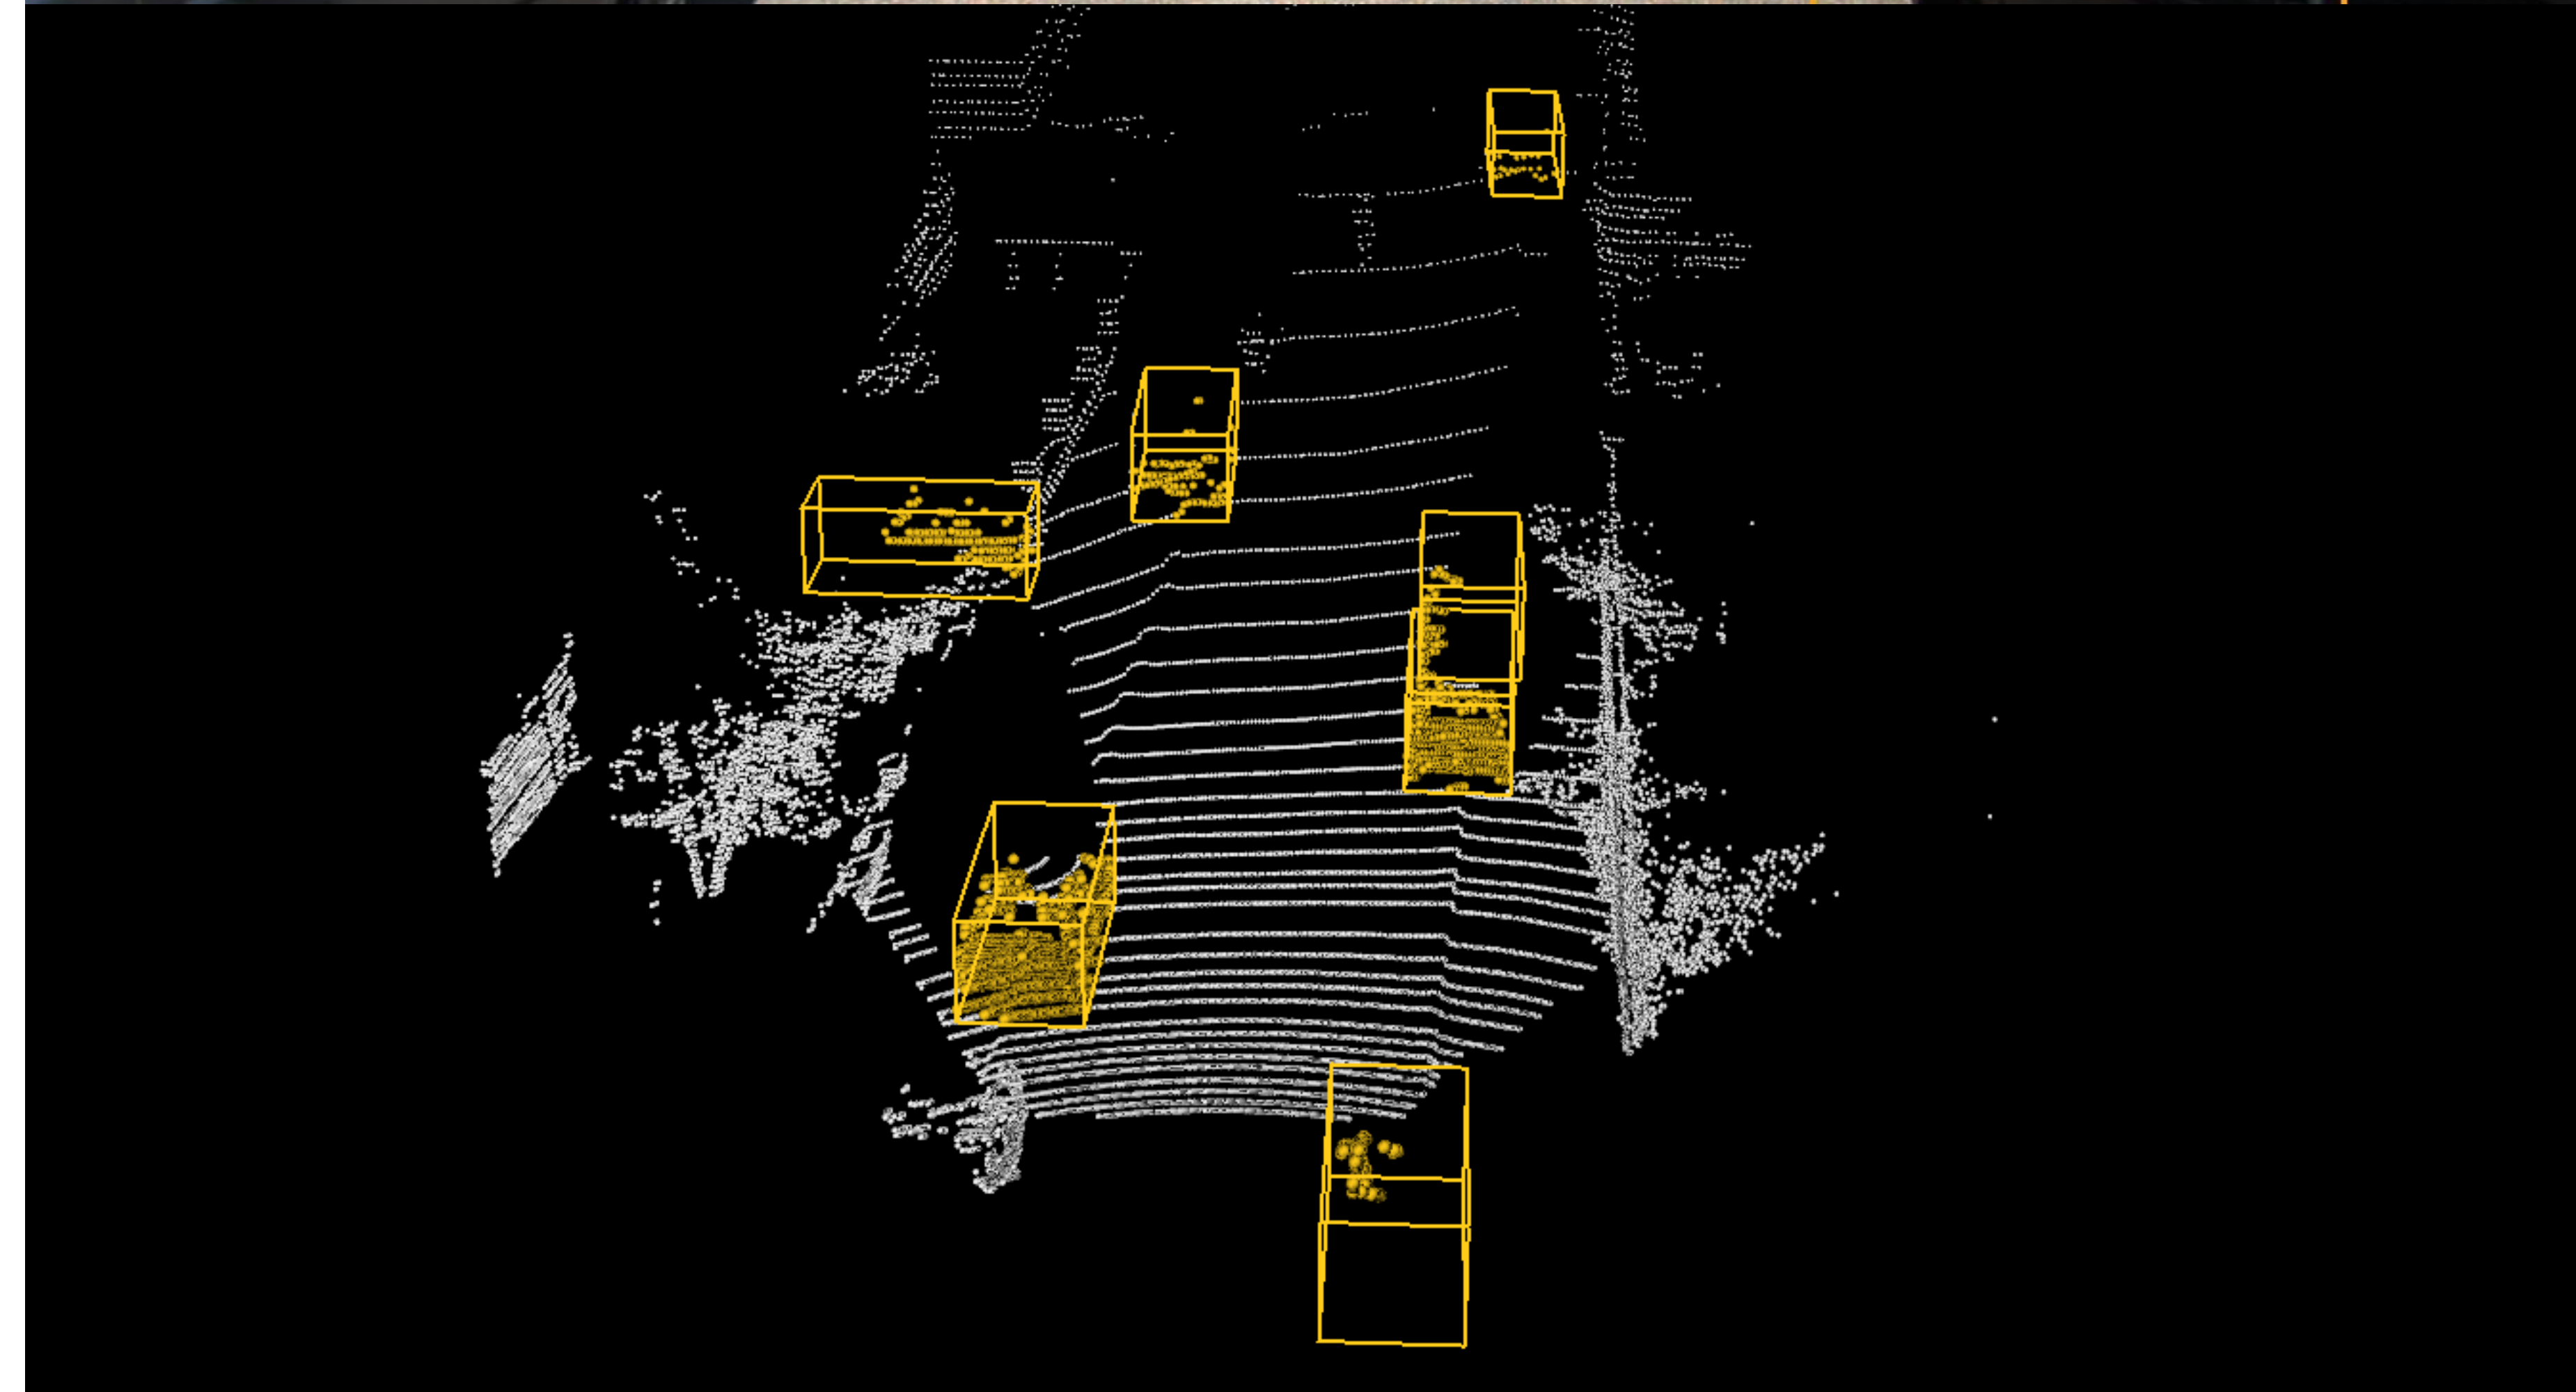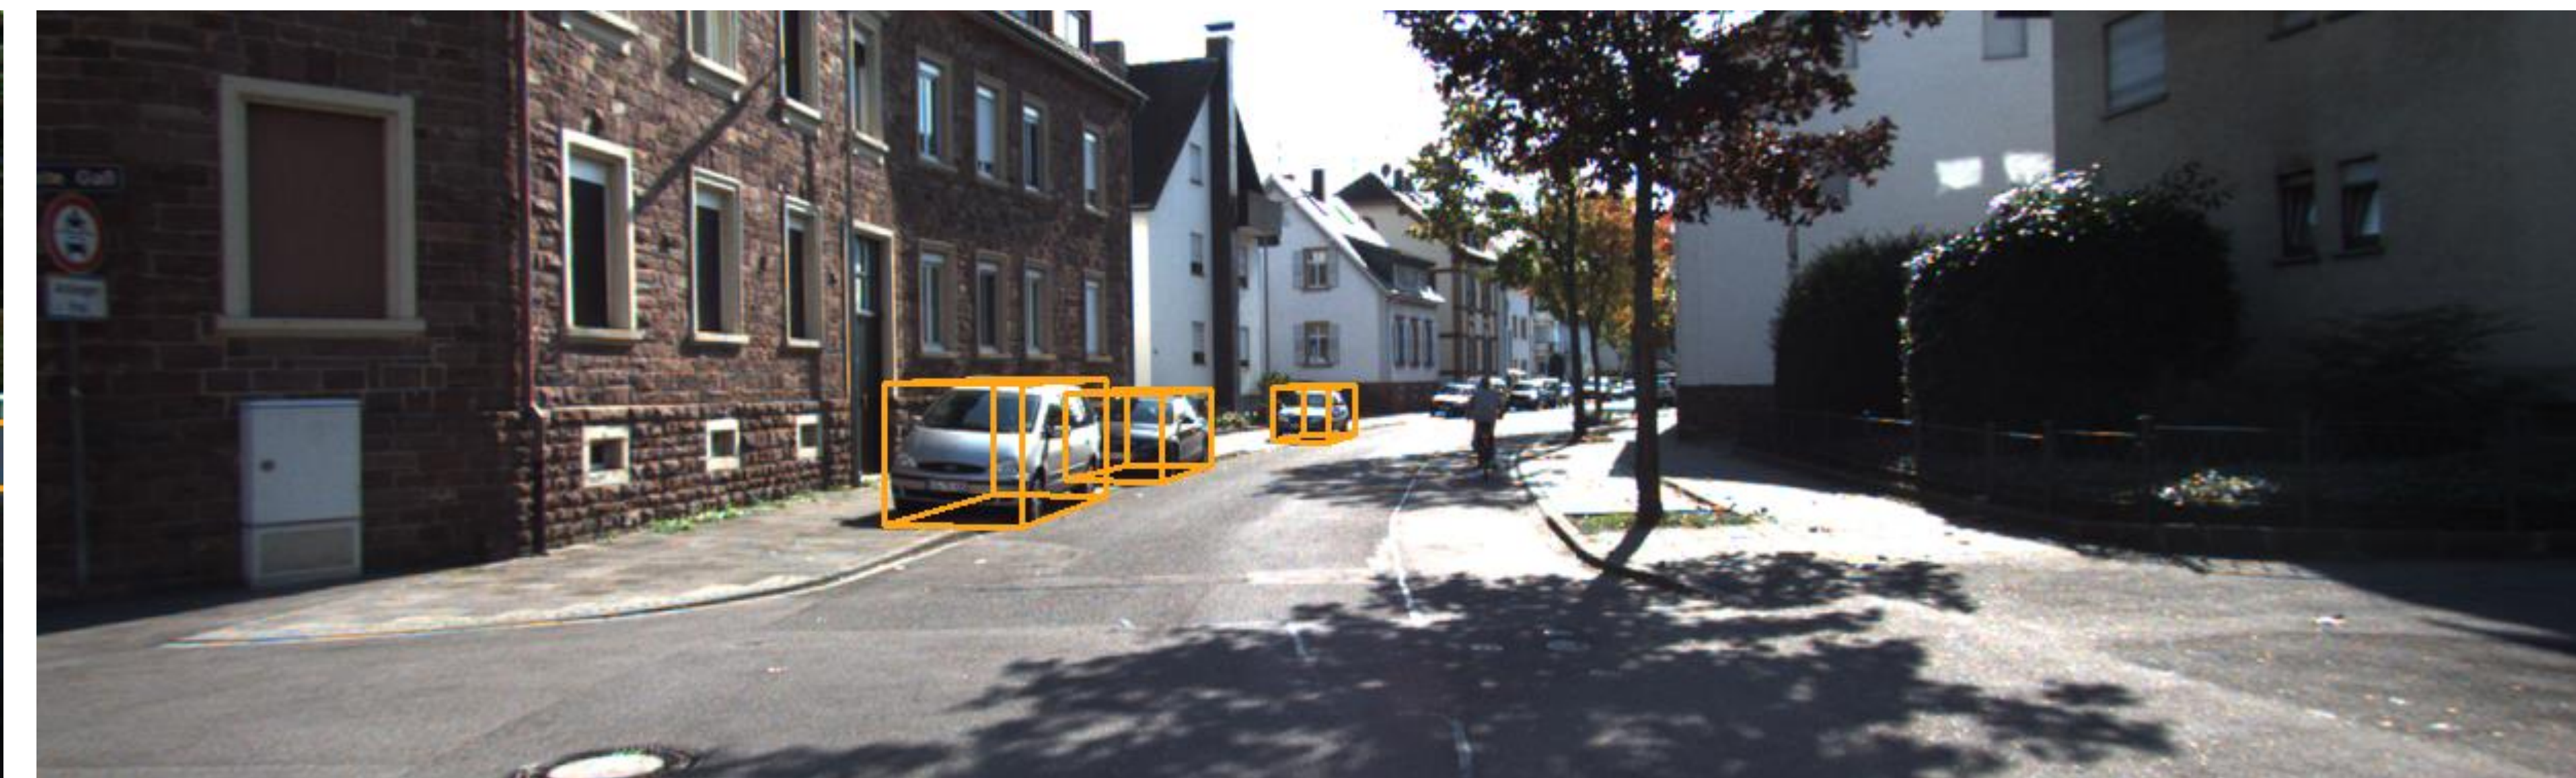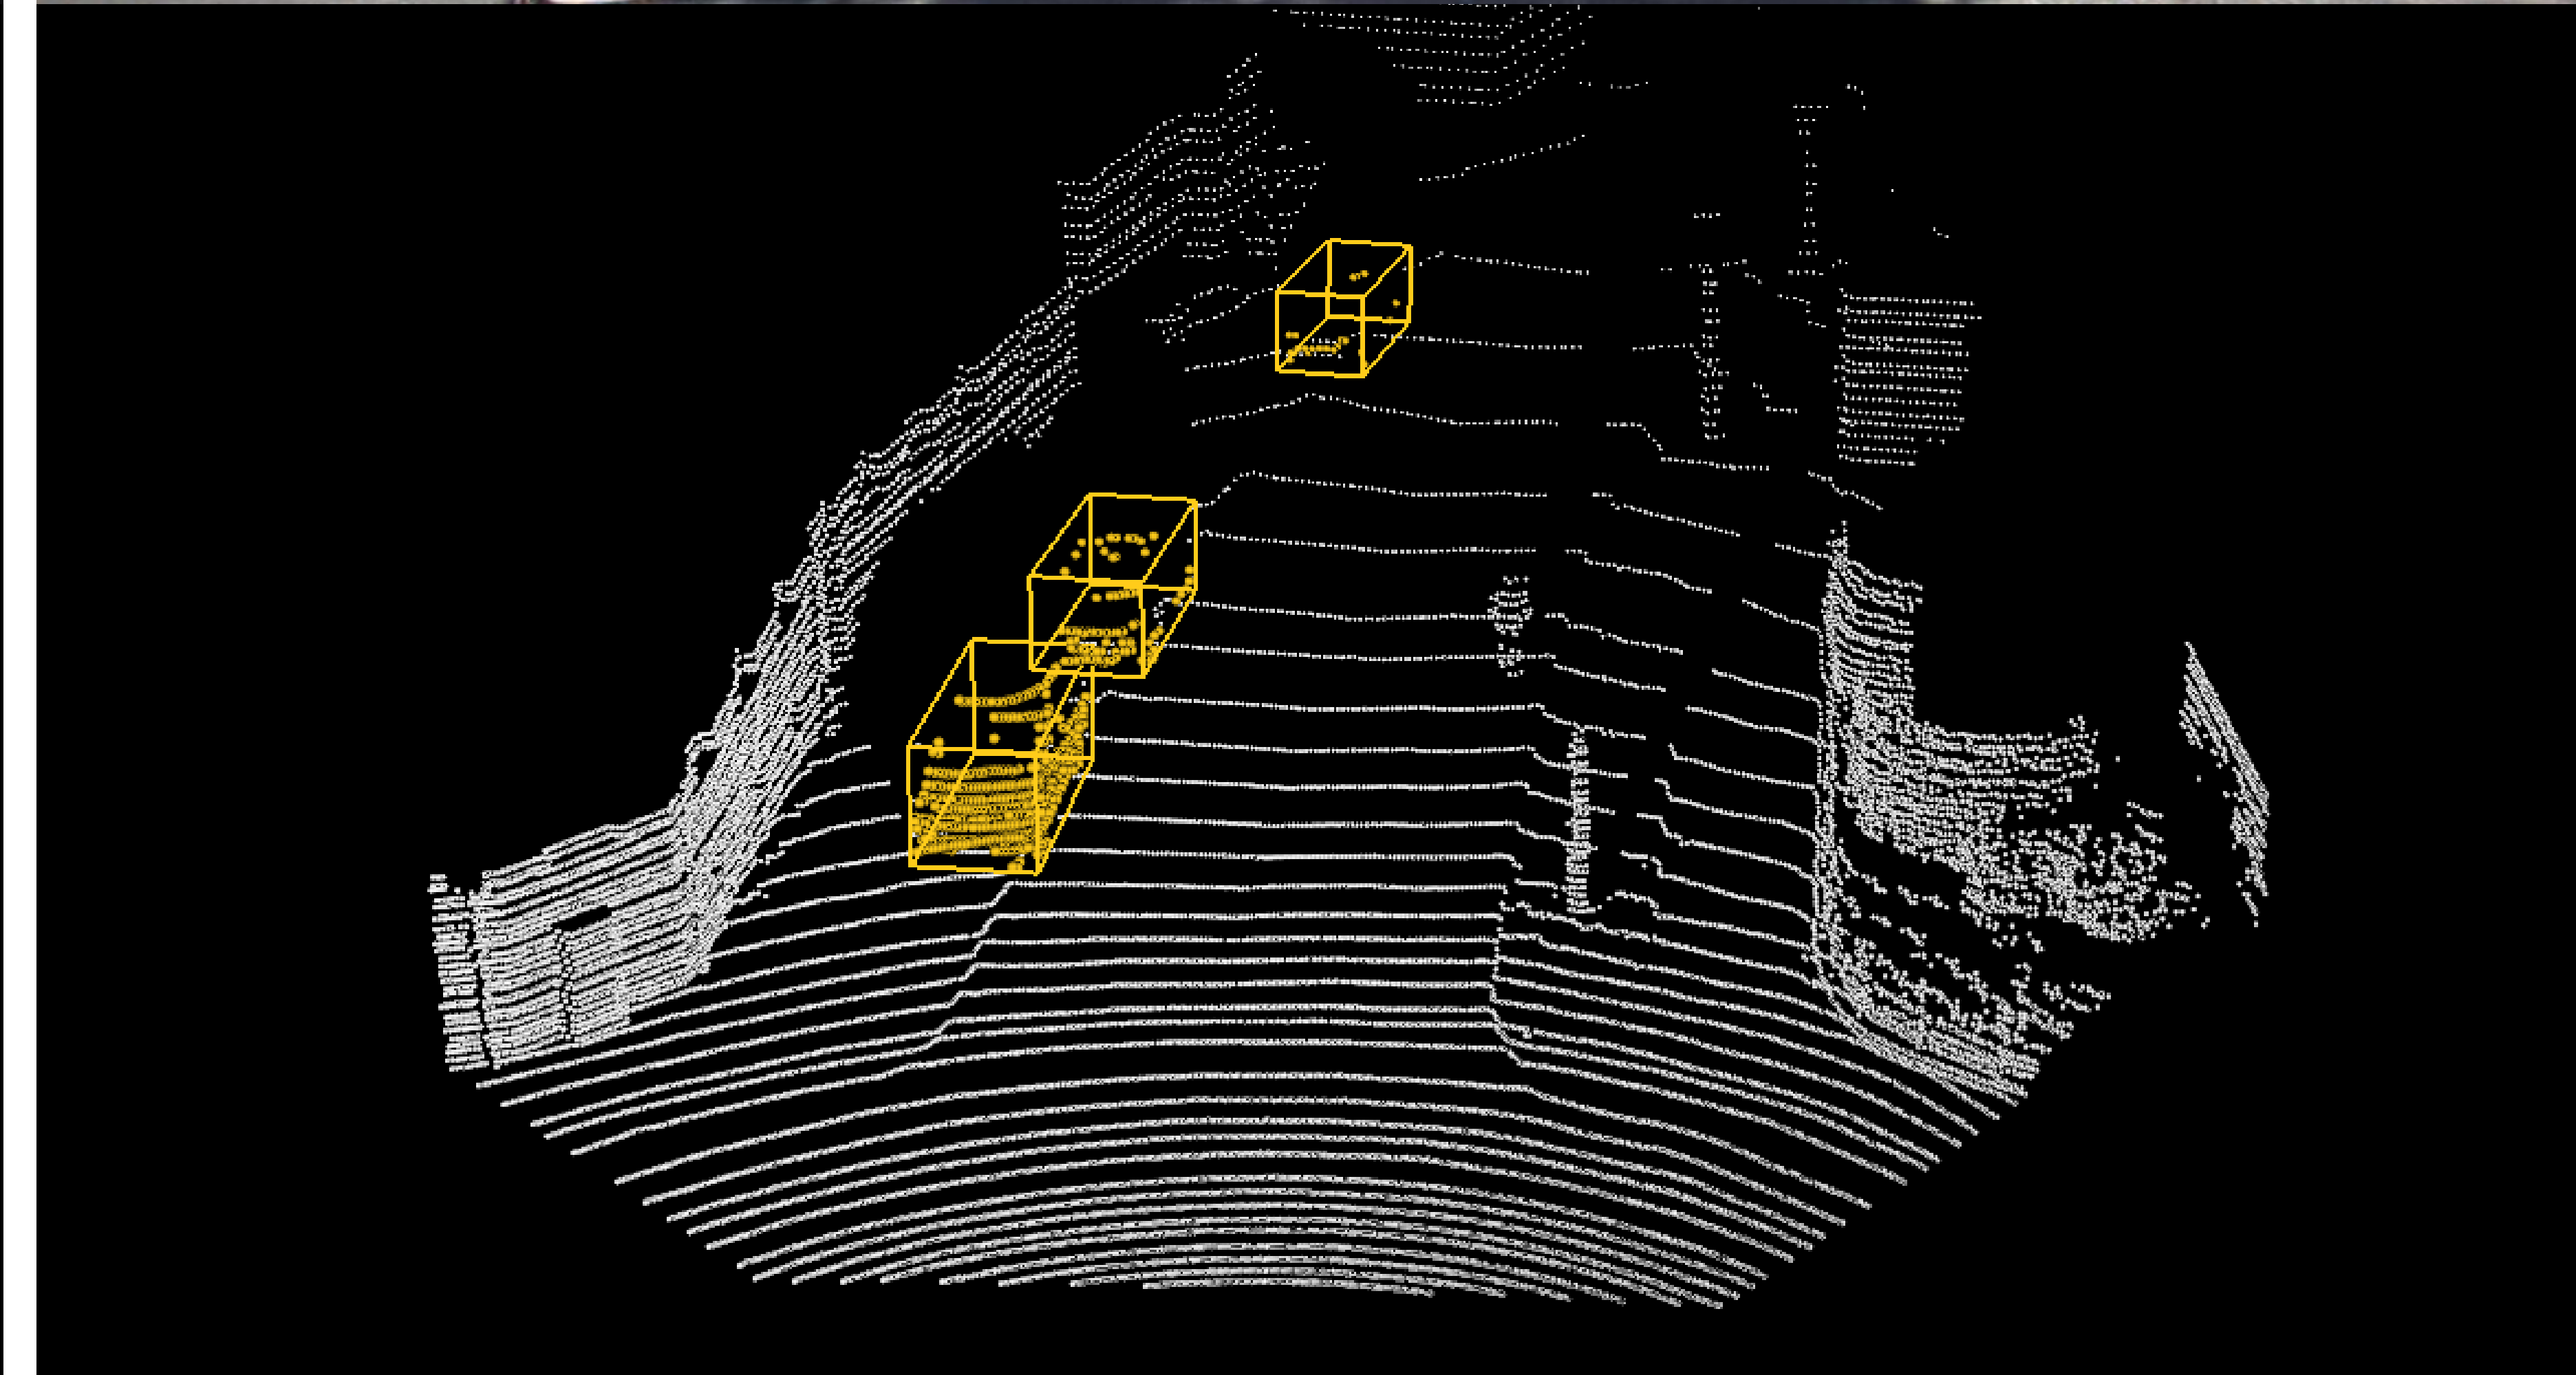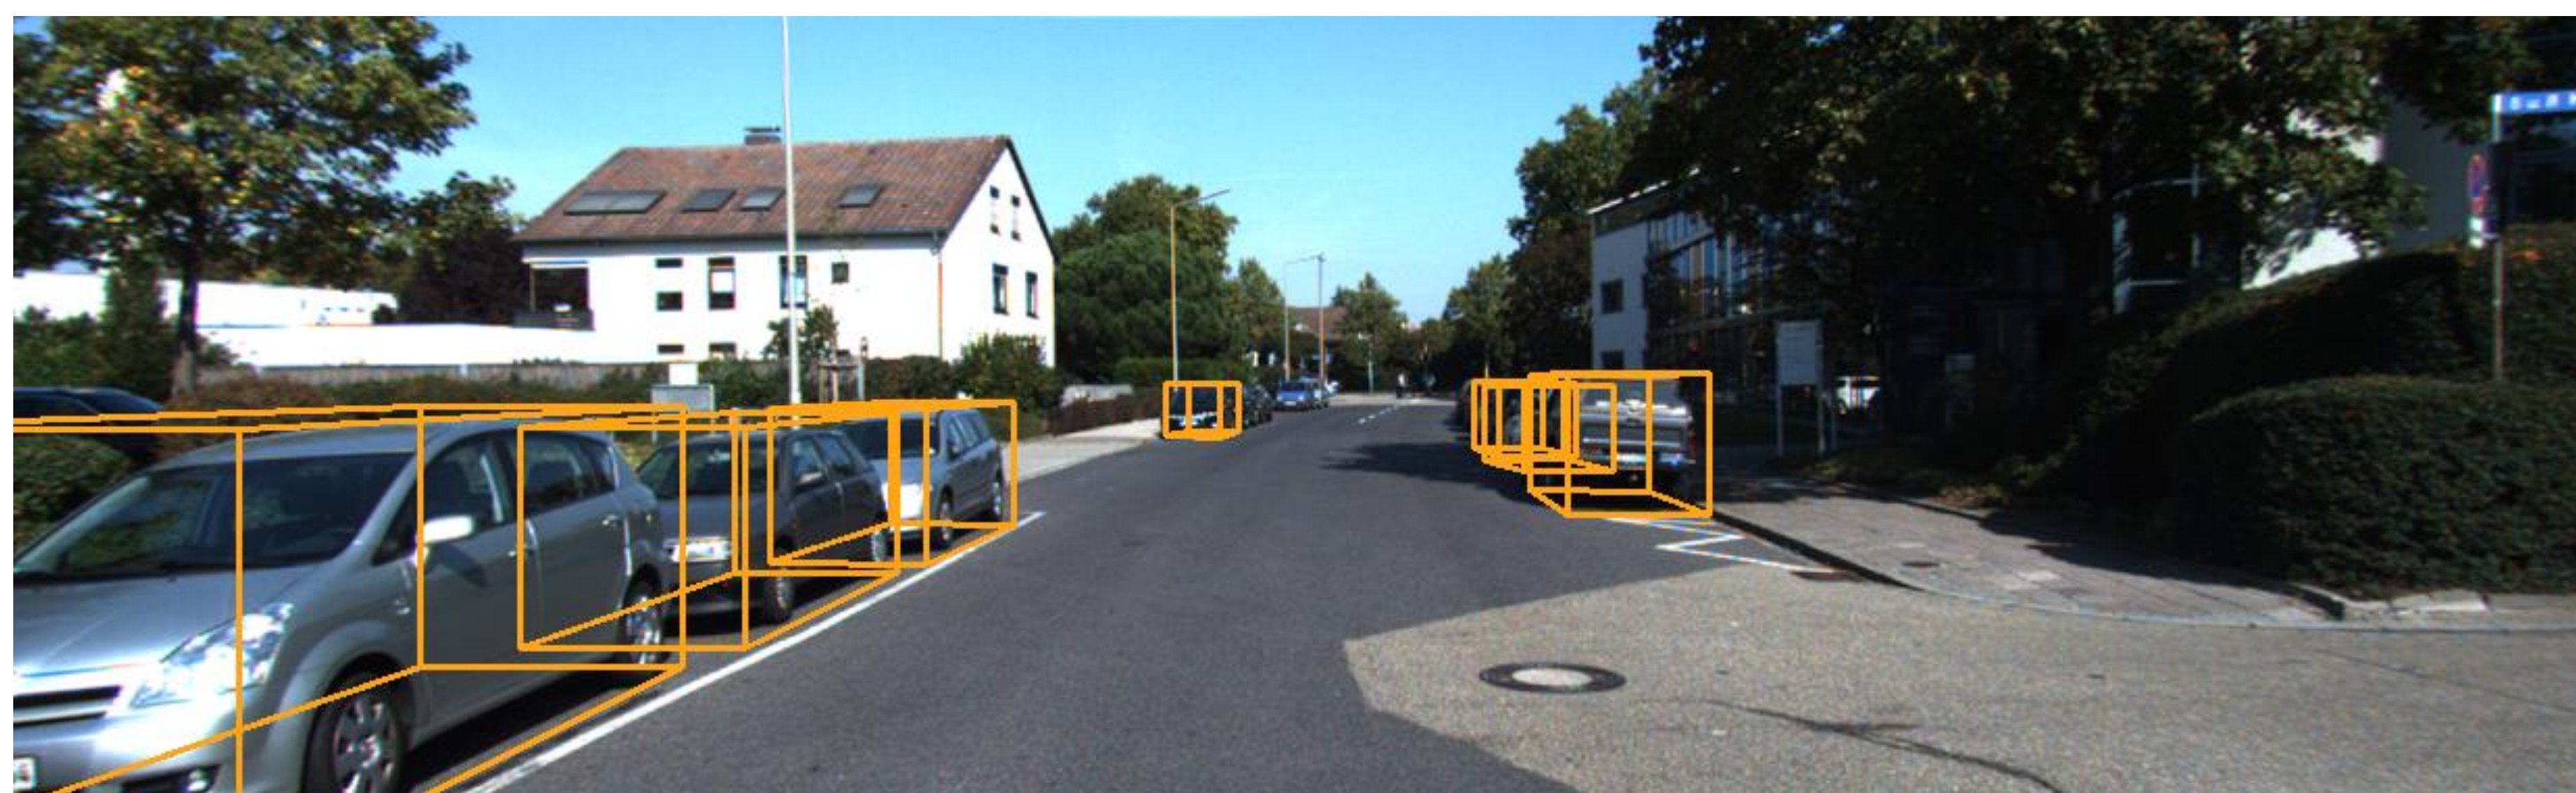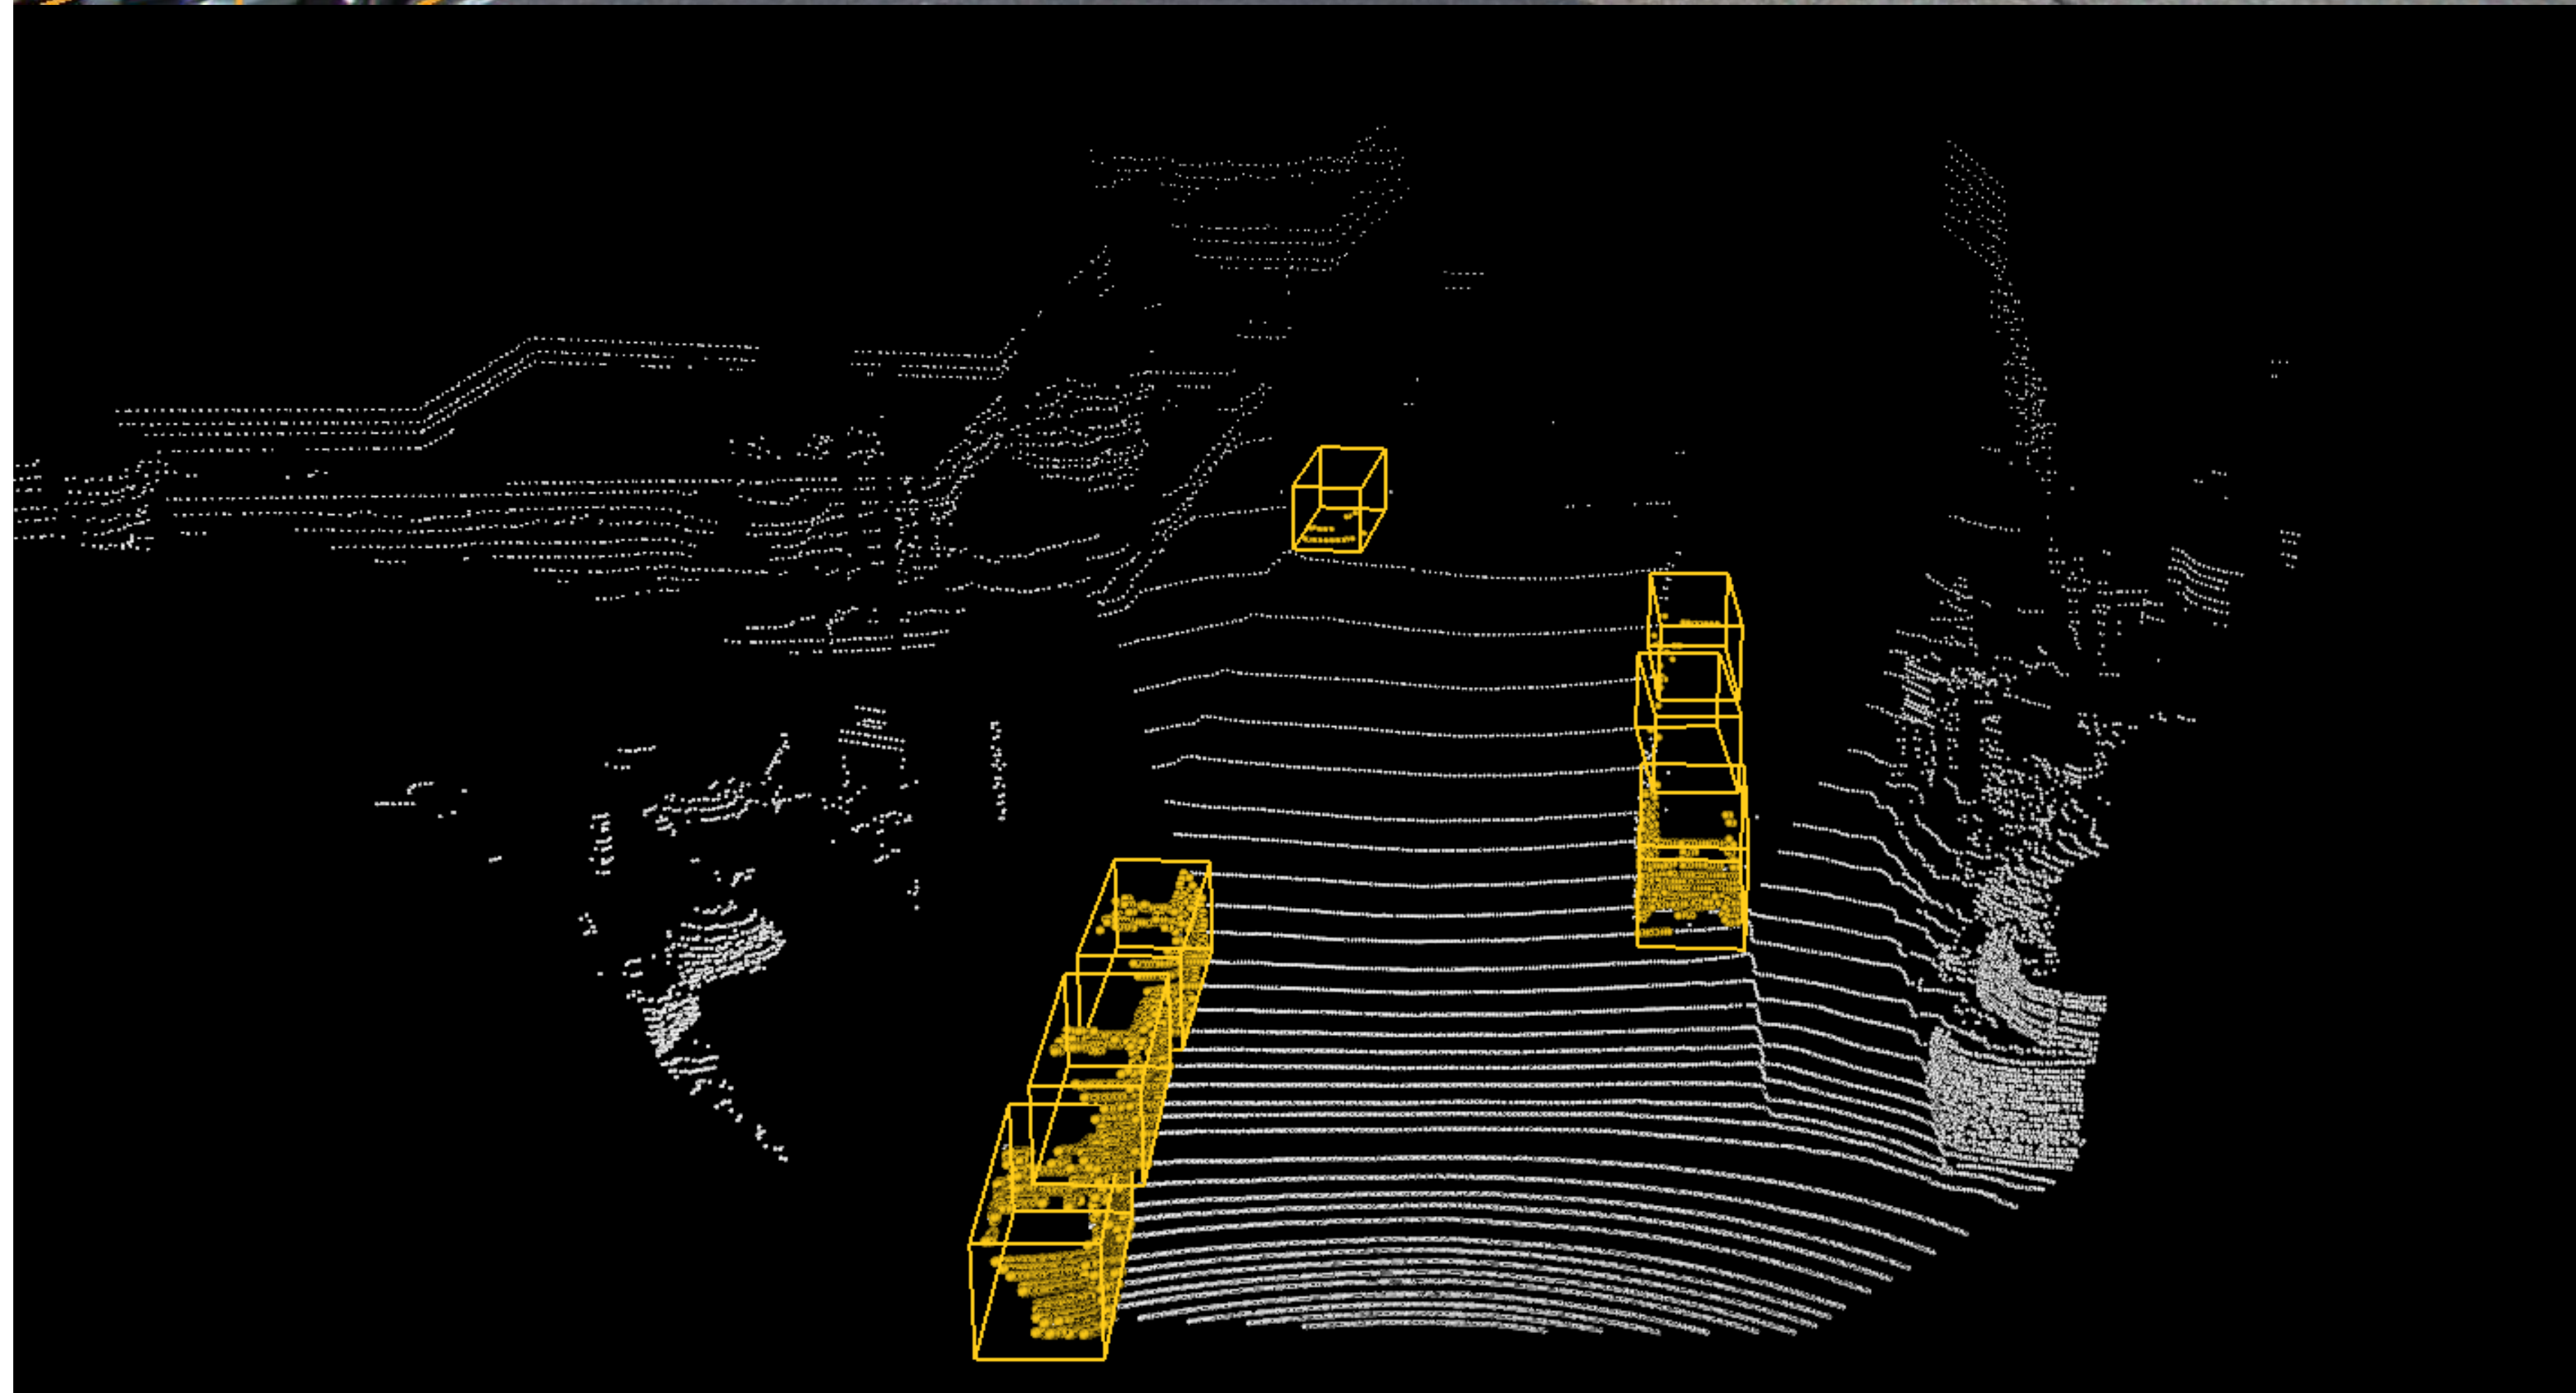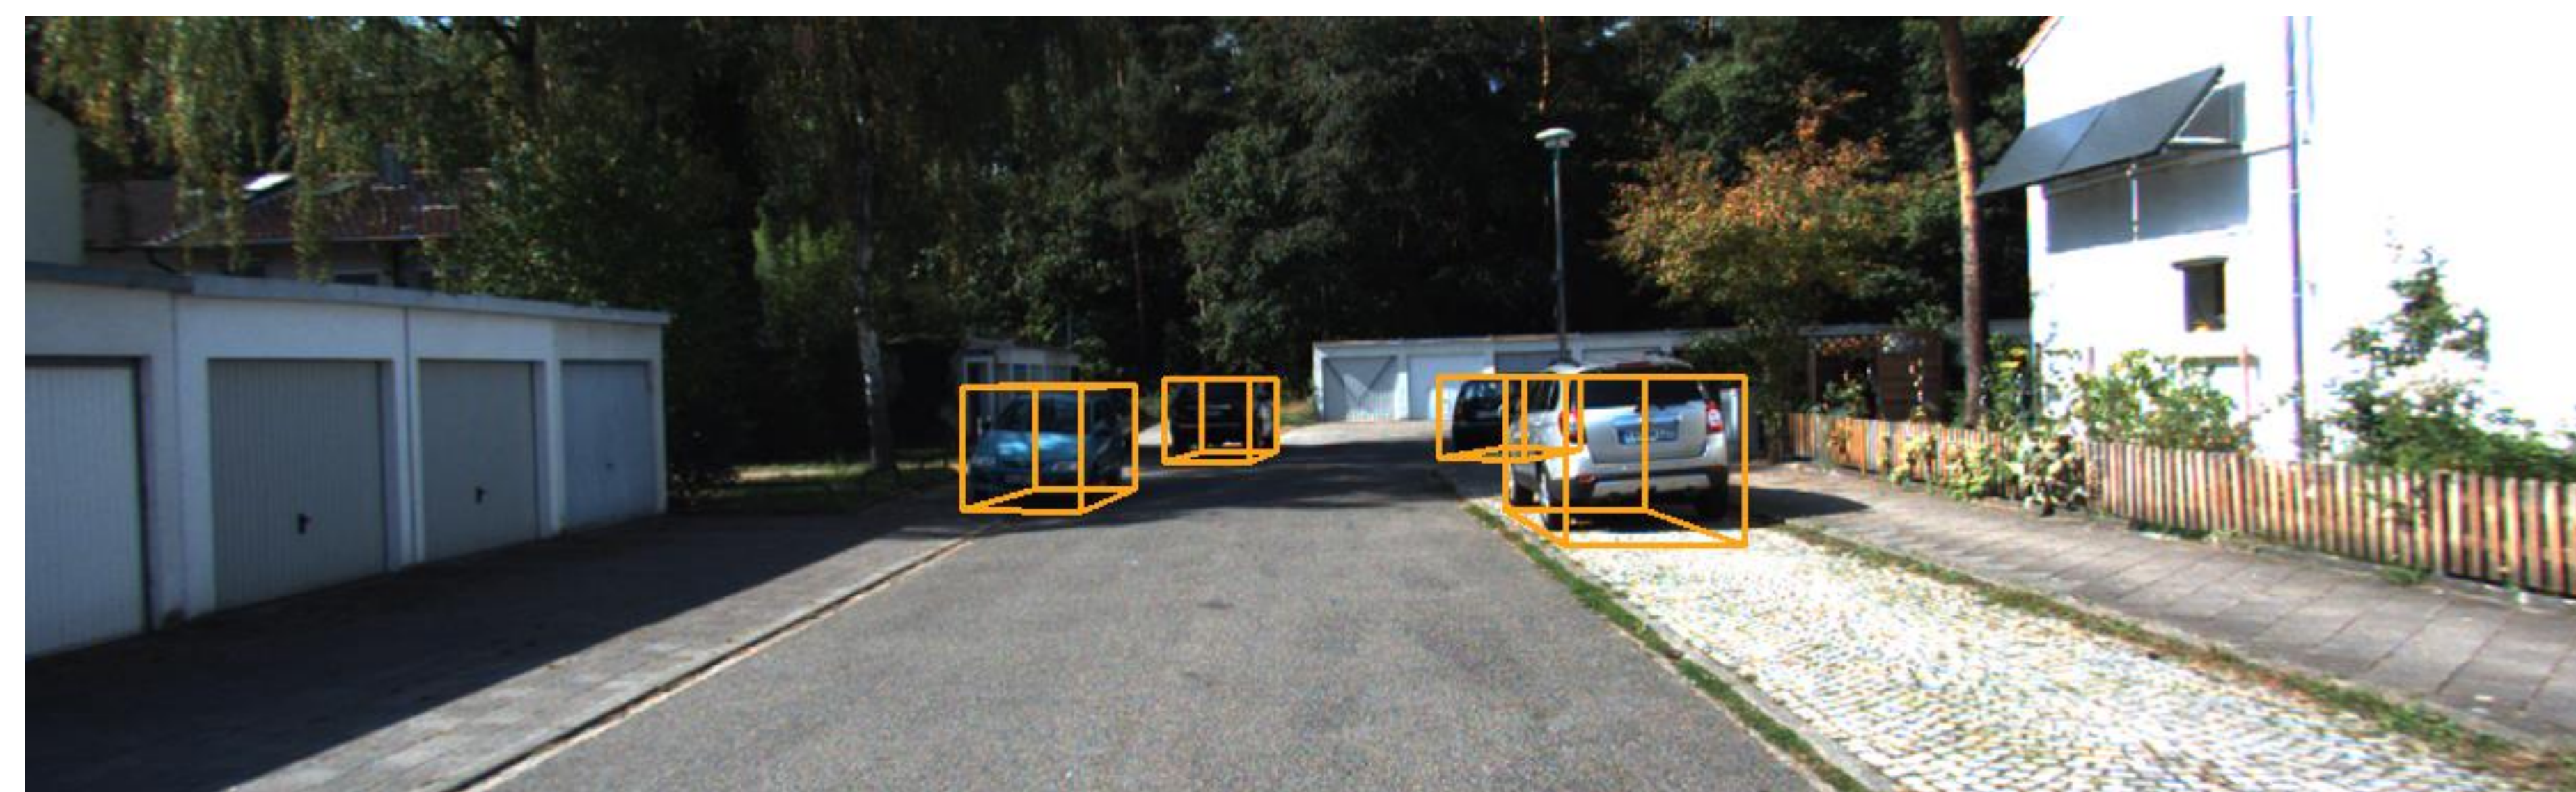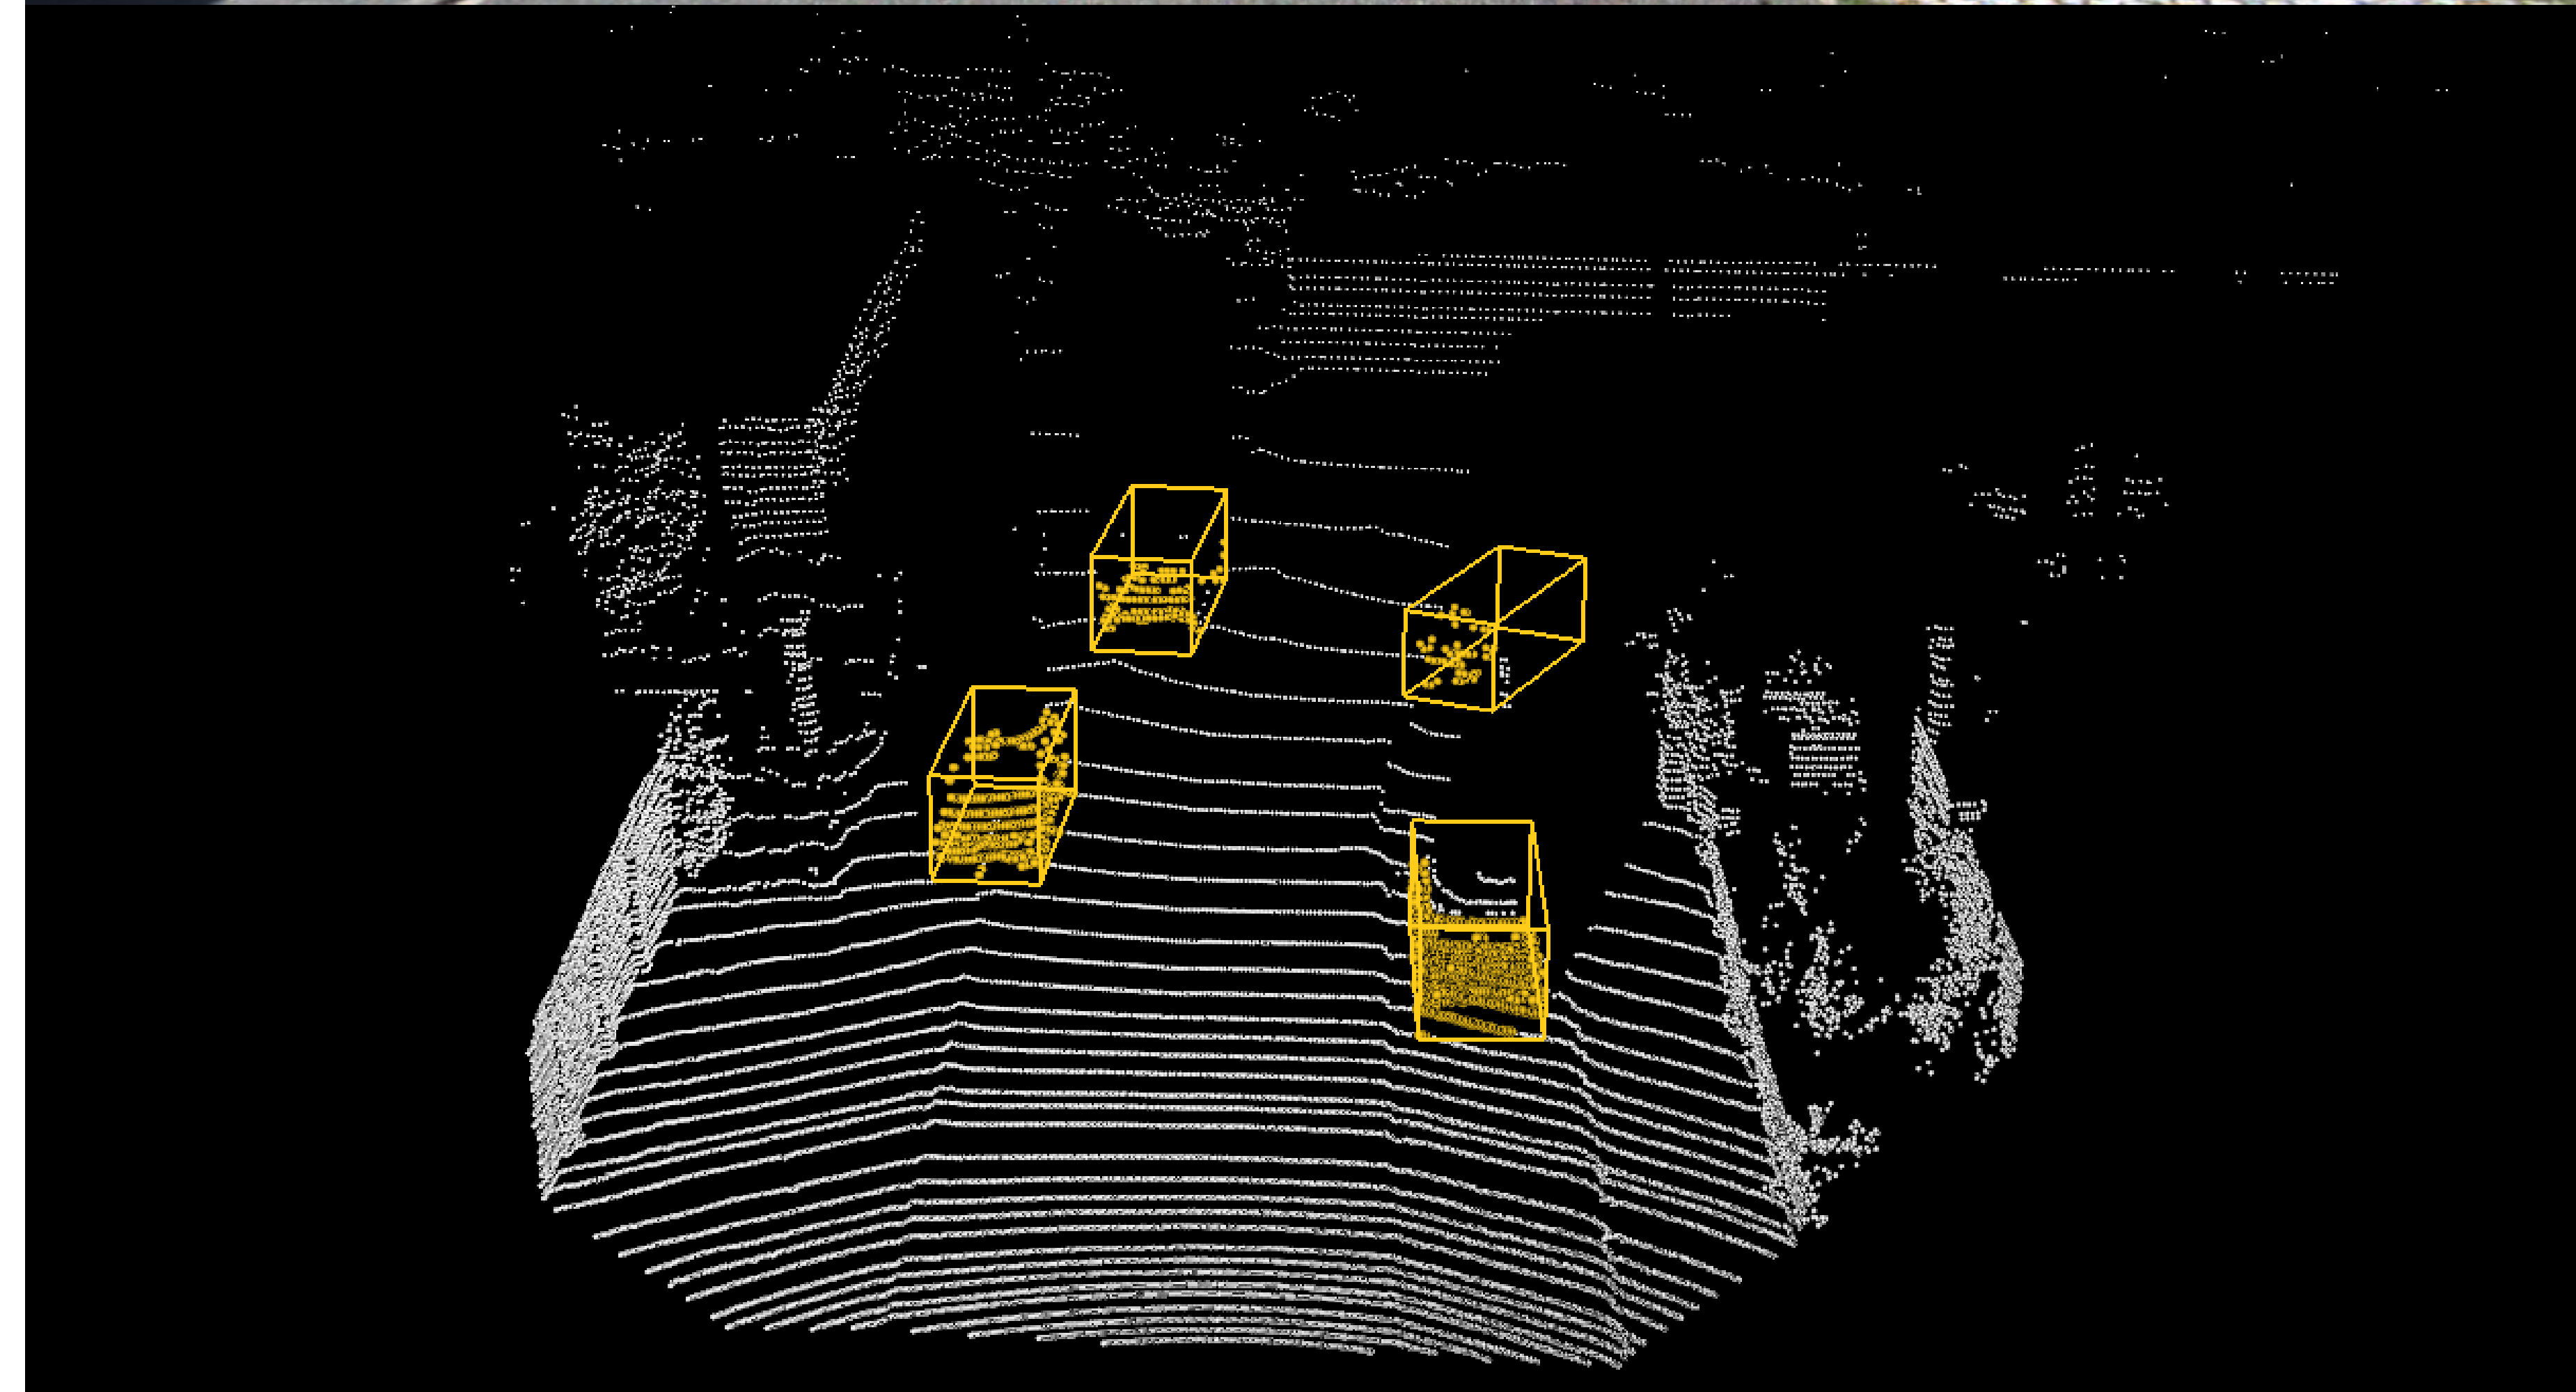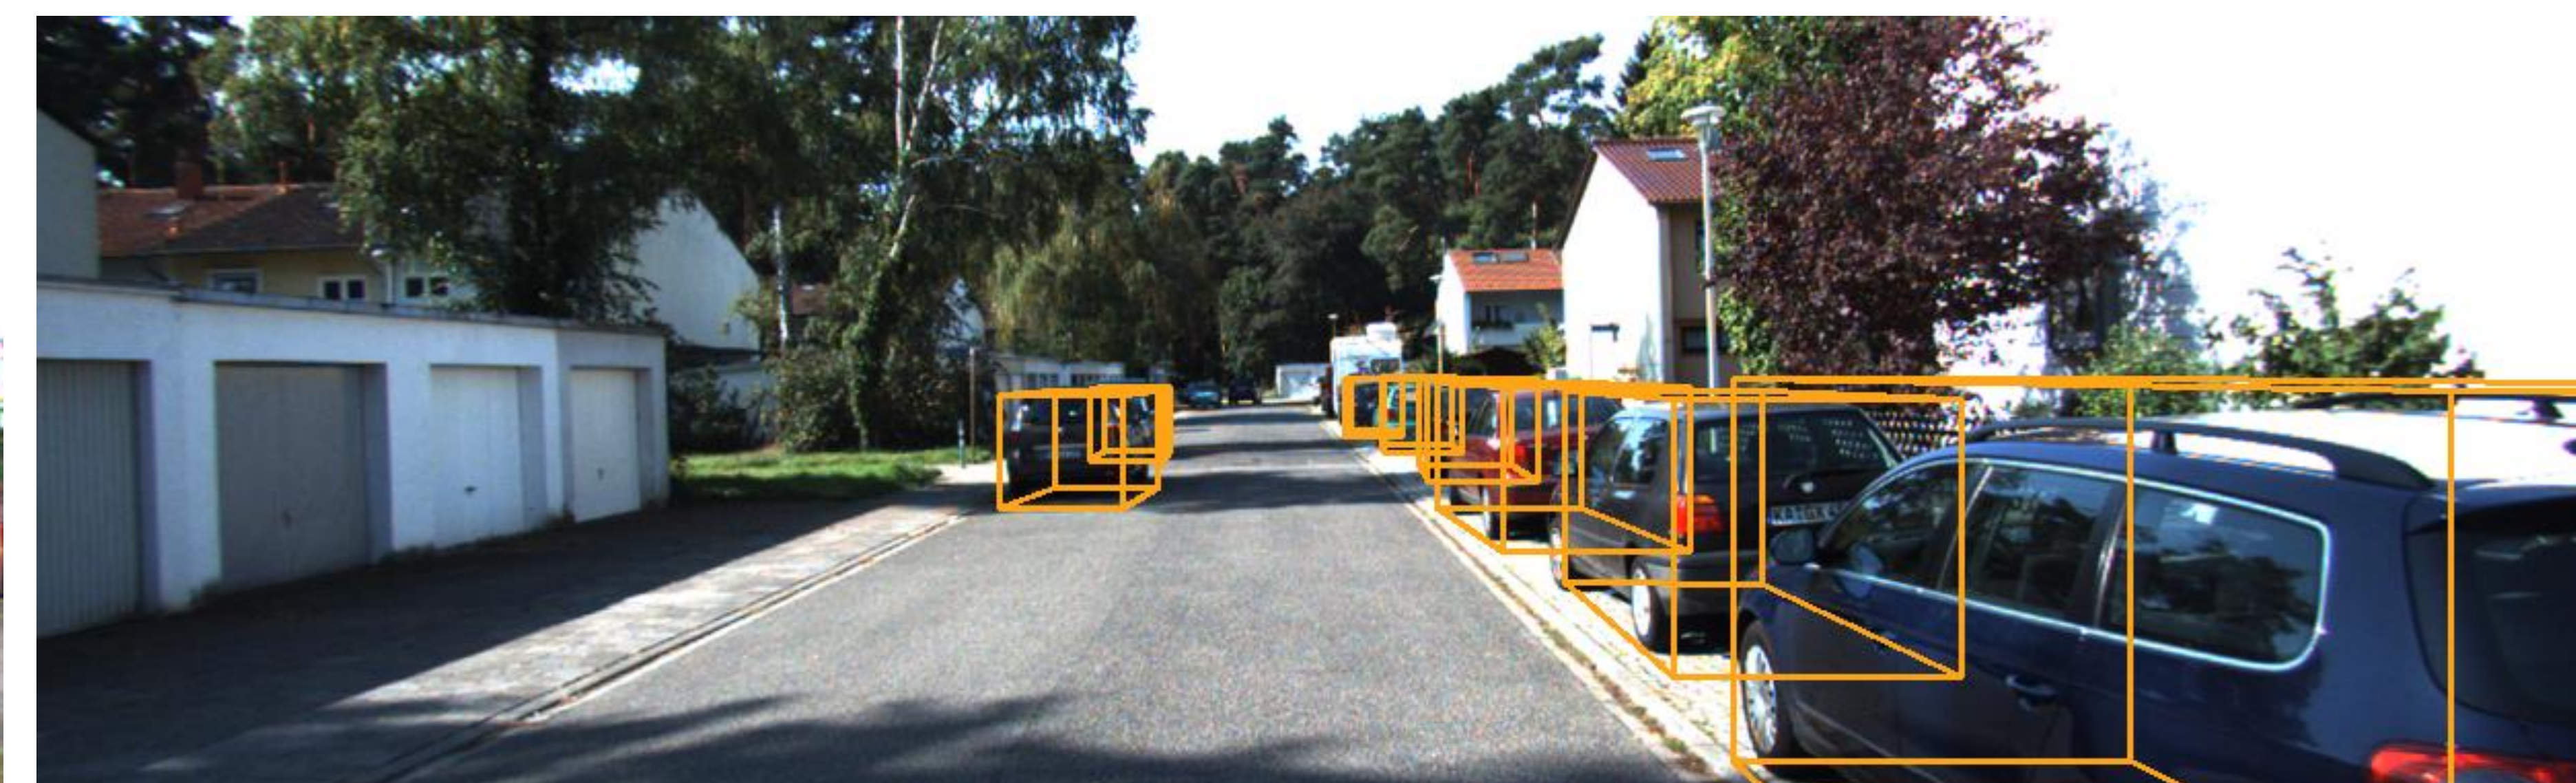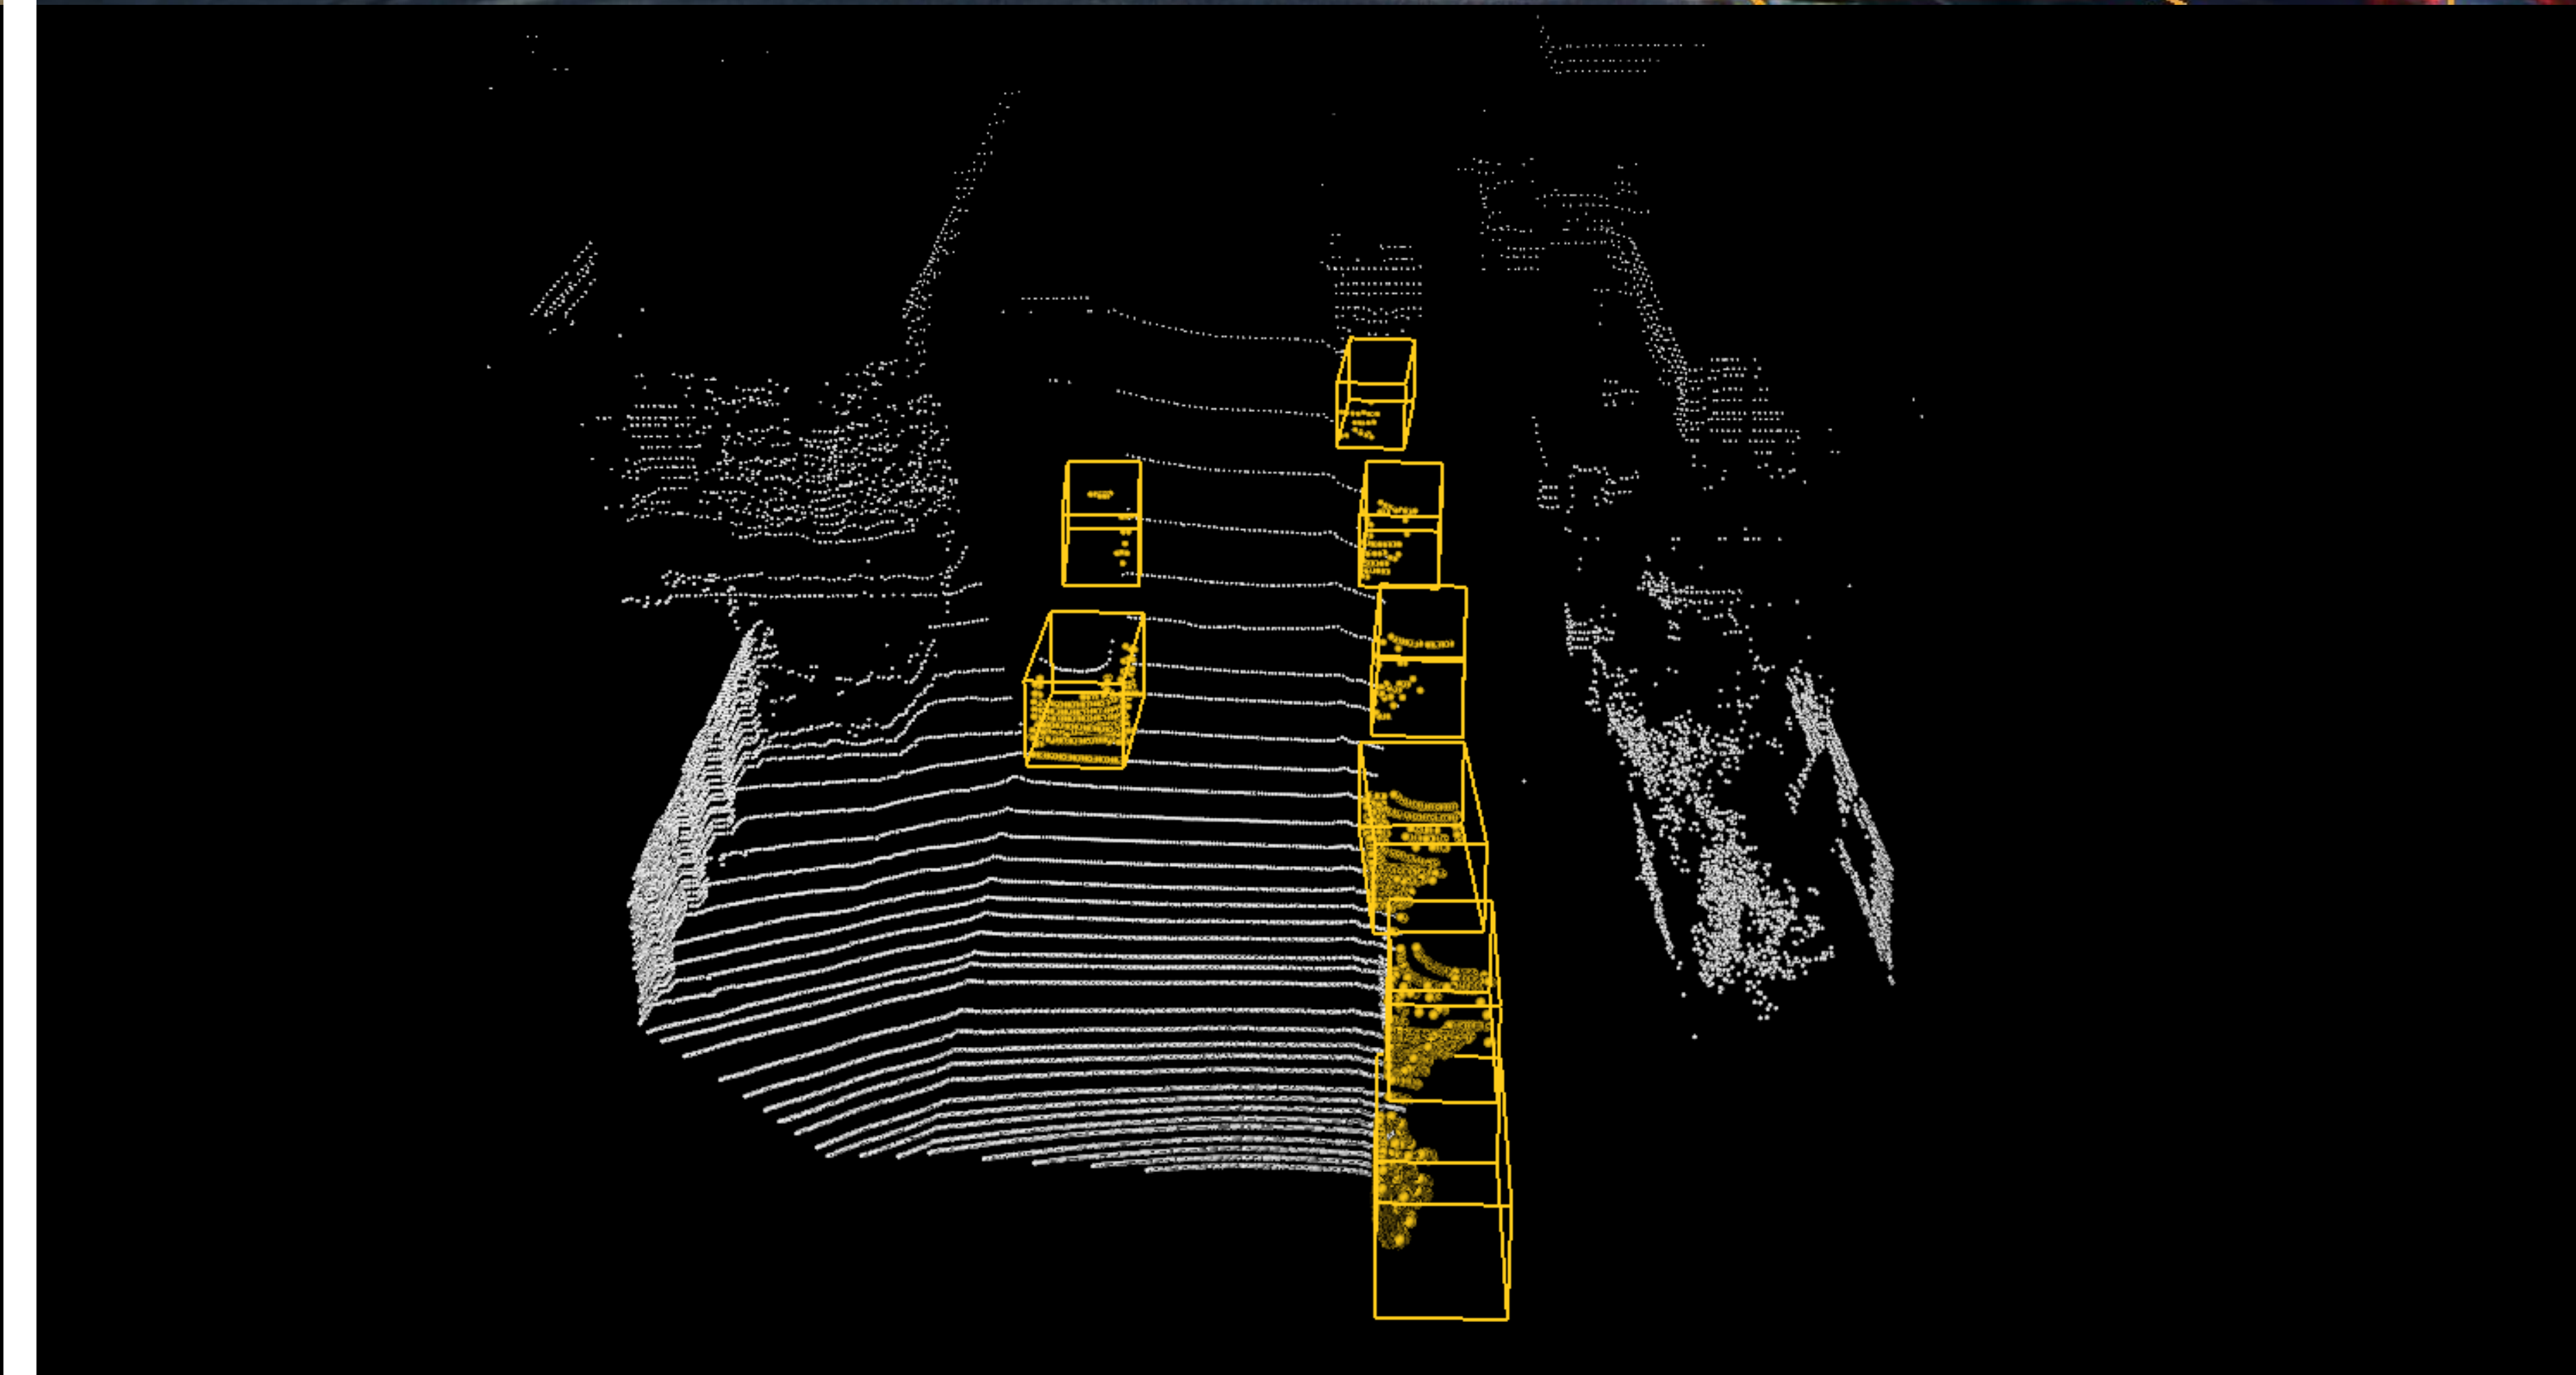

Supplement: Supplementary file 3 [file 123580511-supp.zip]

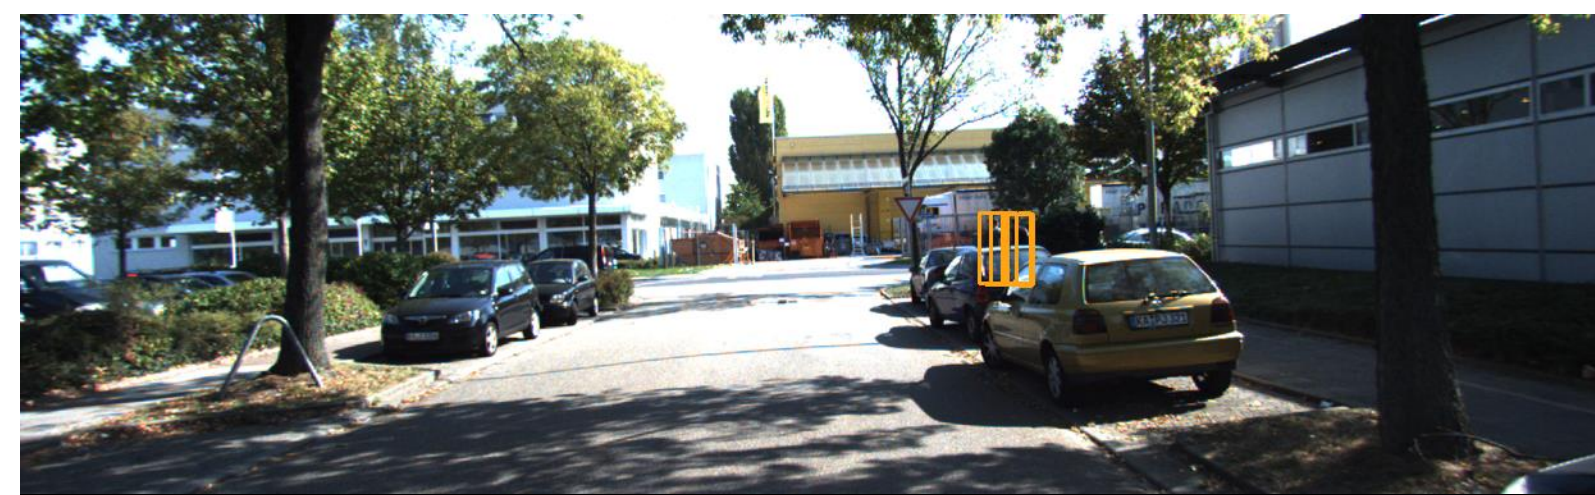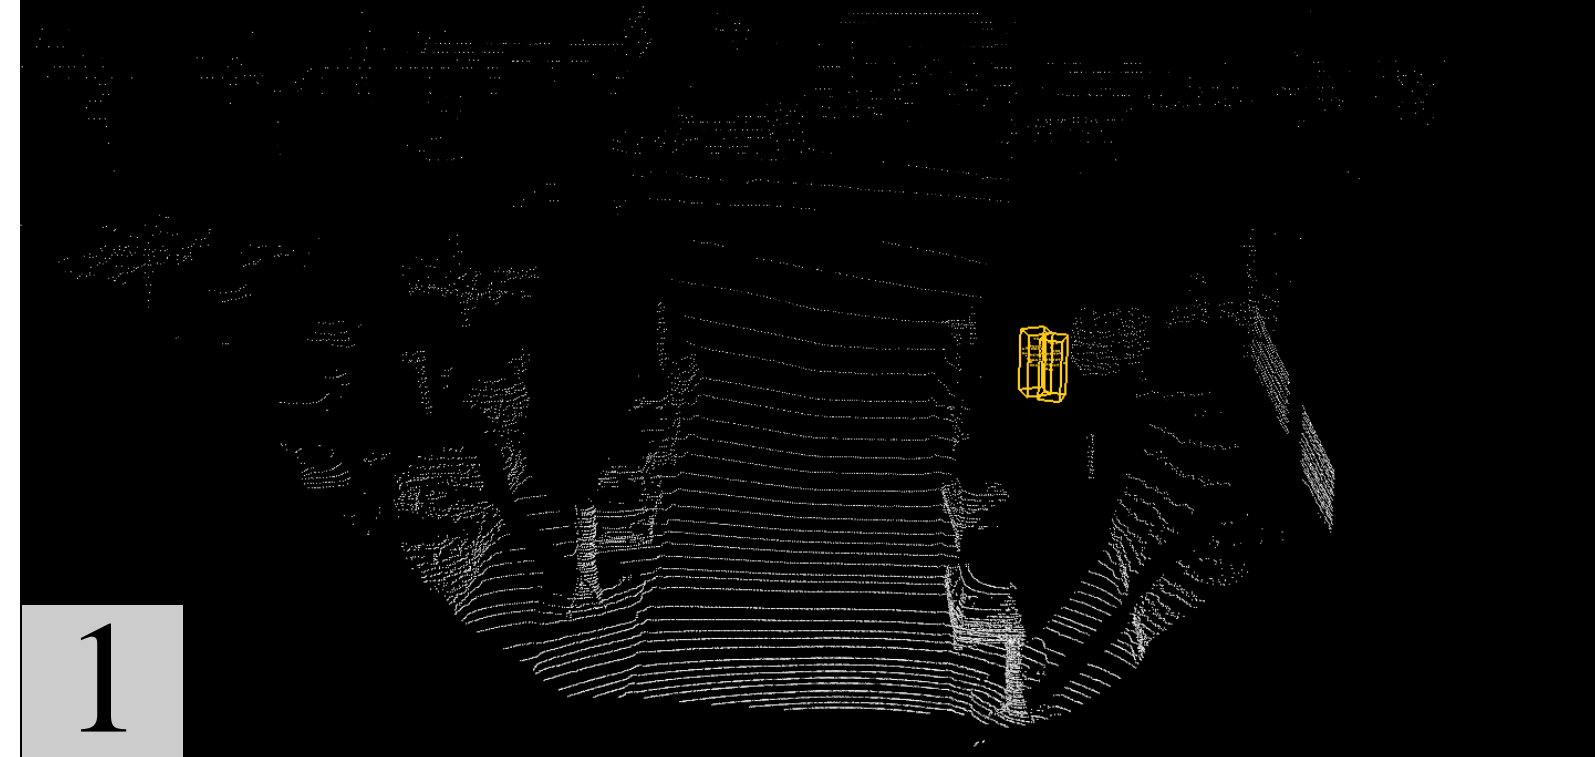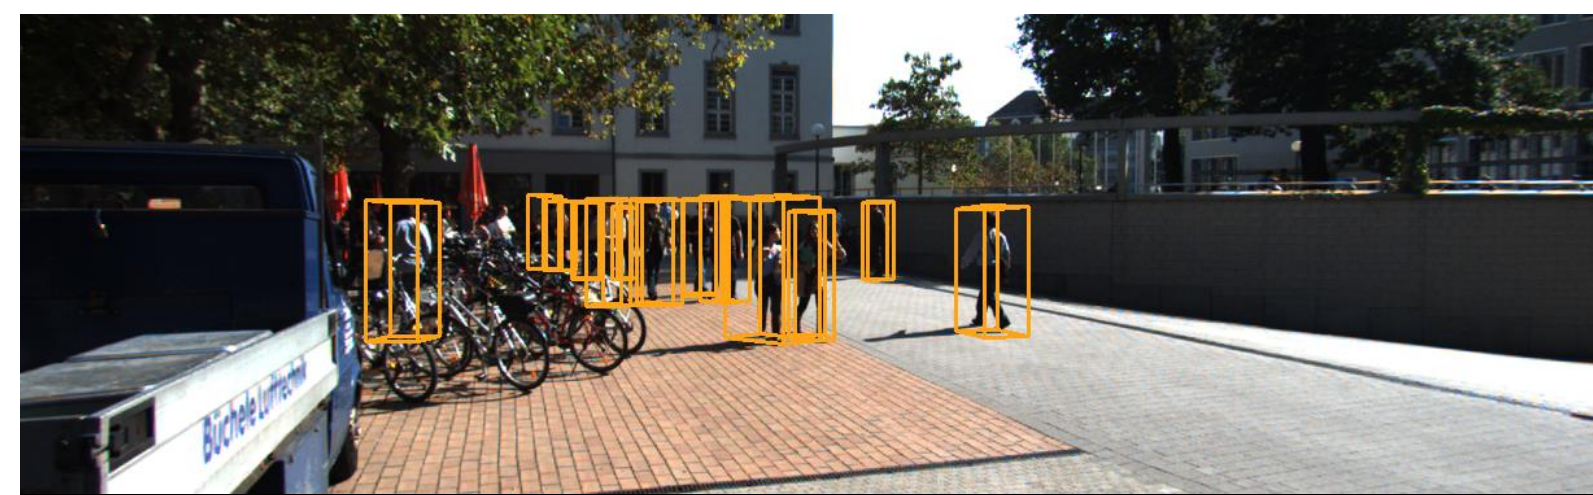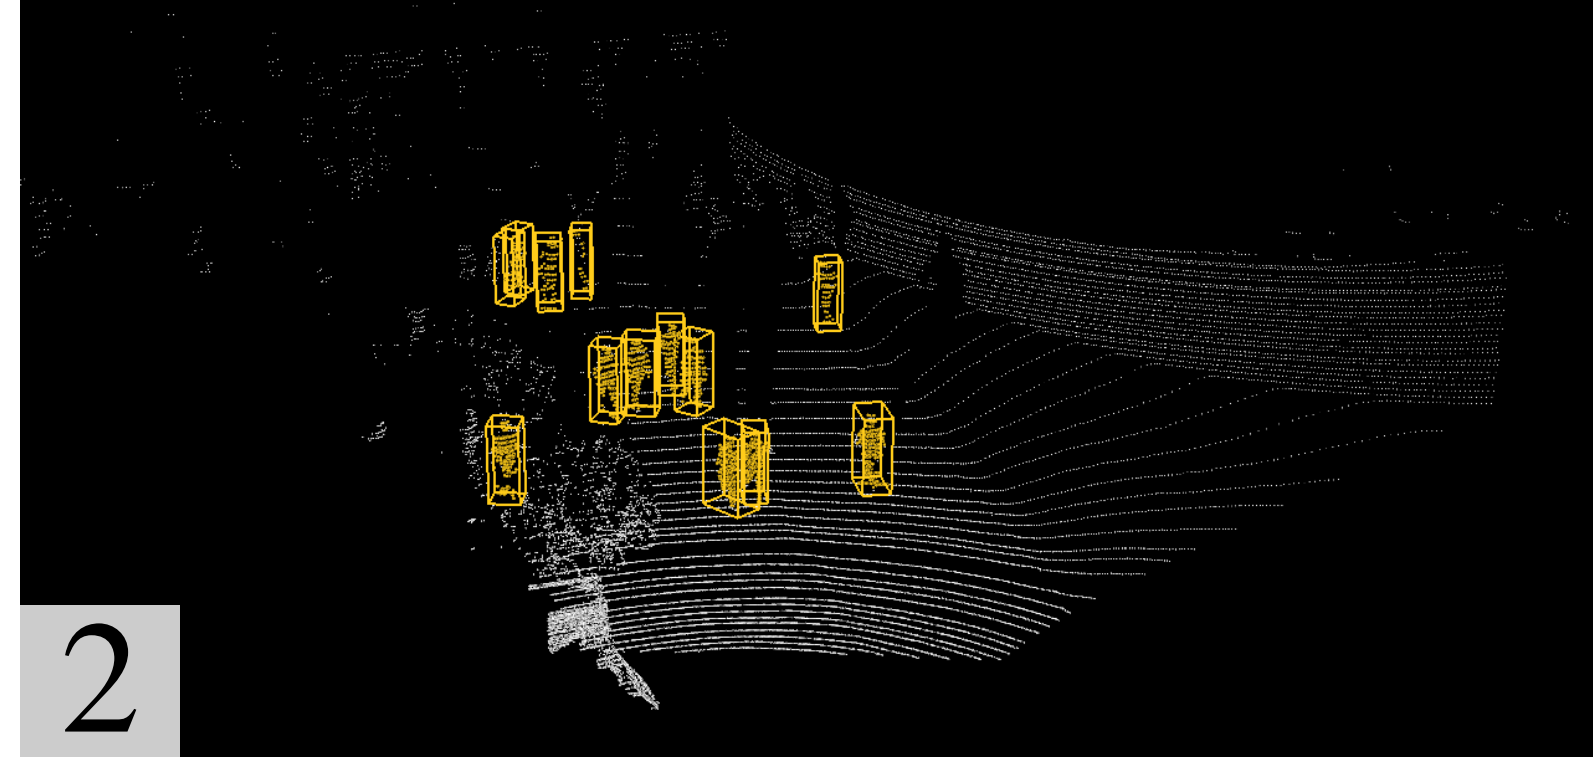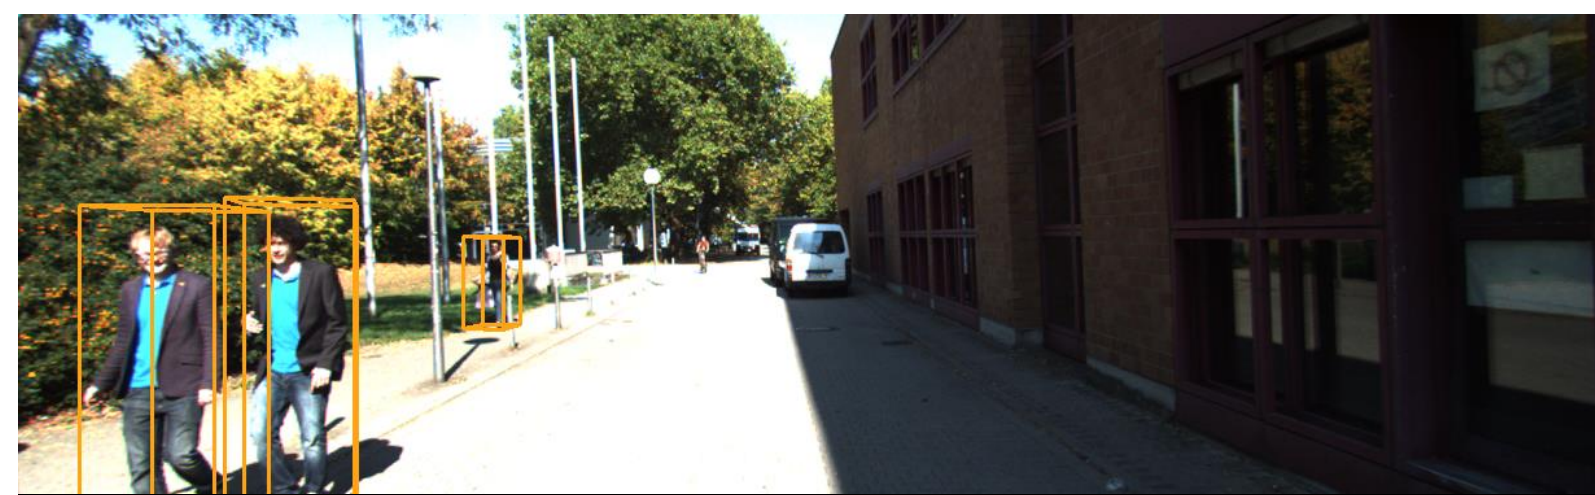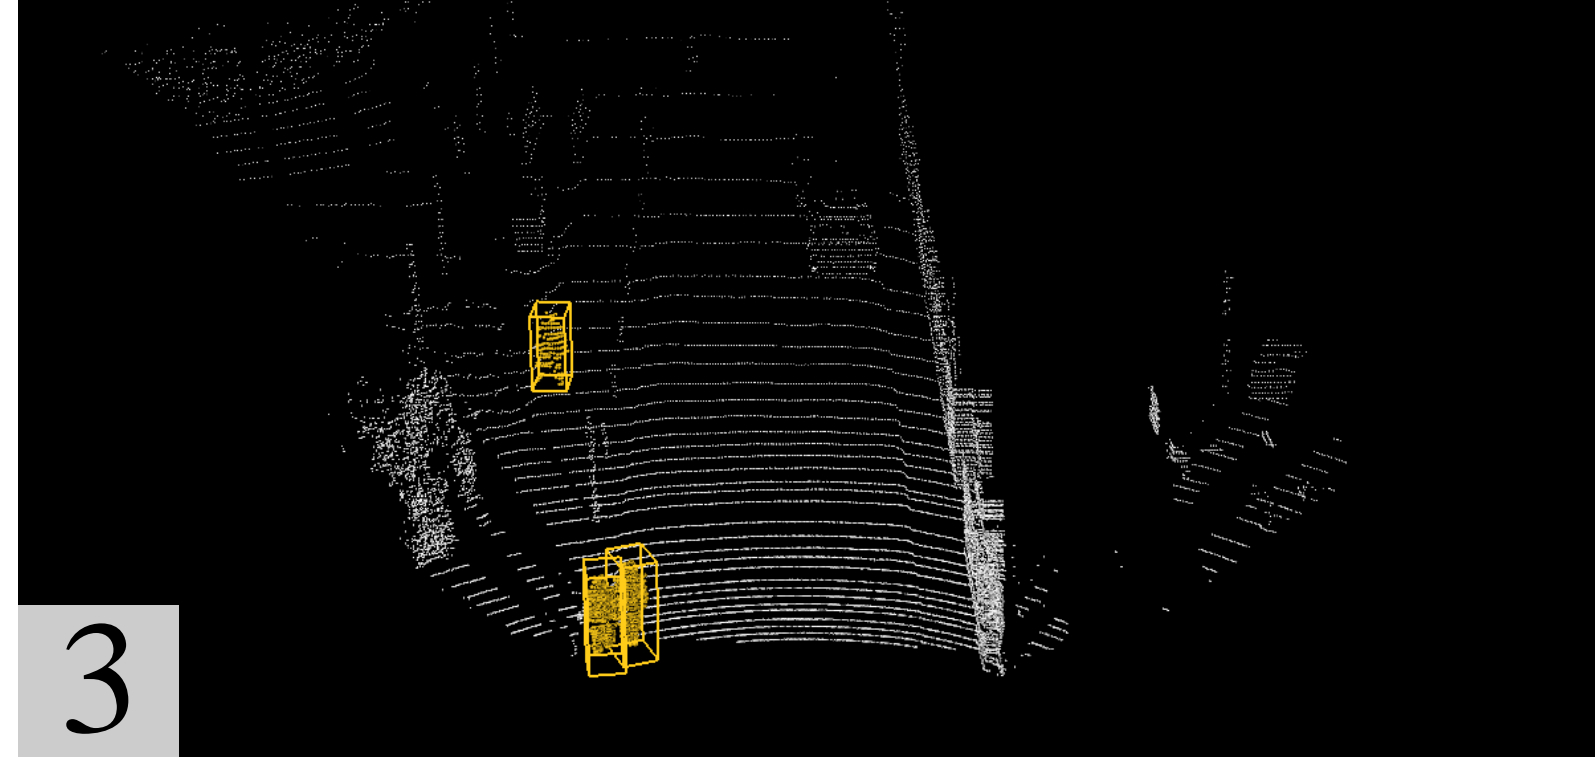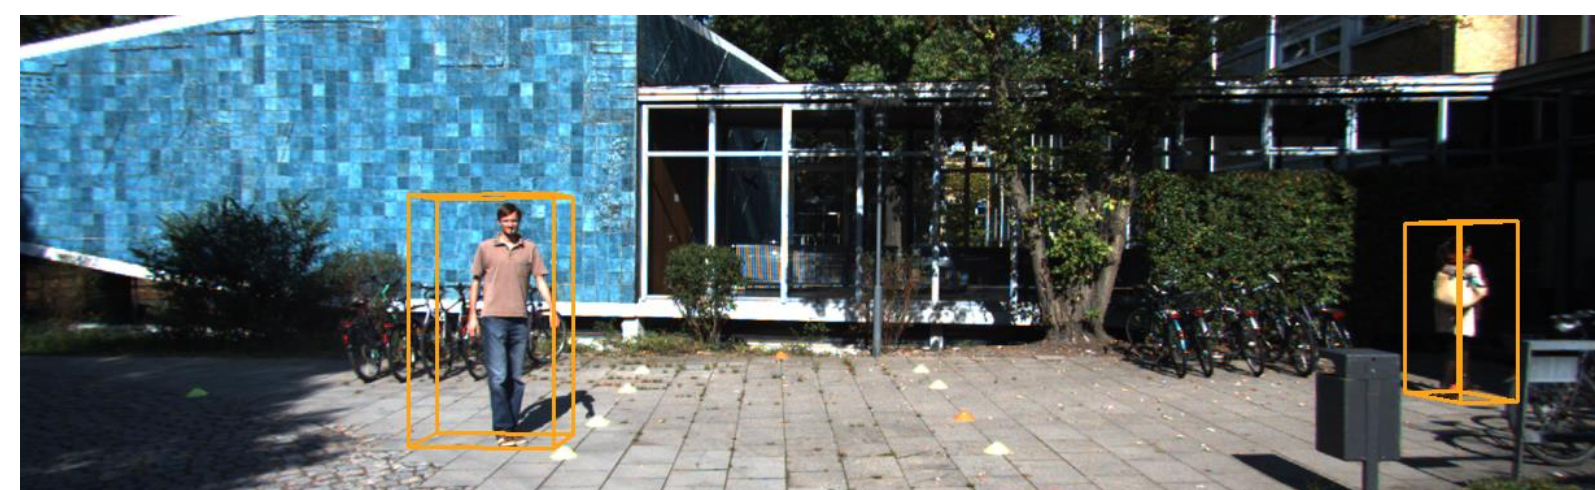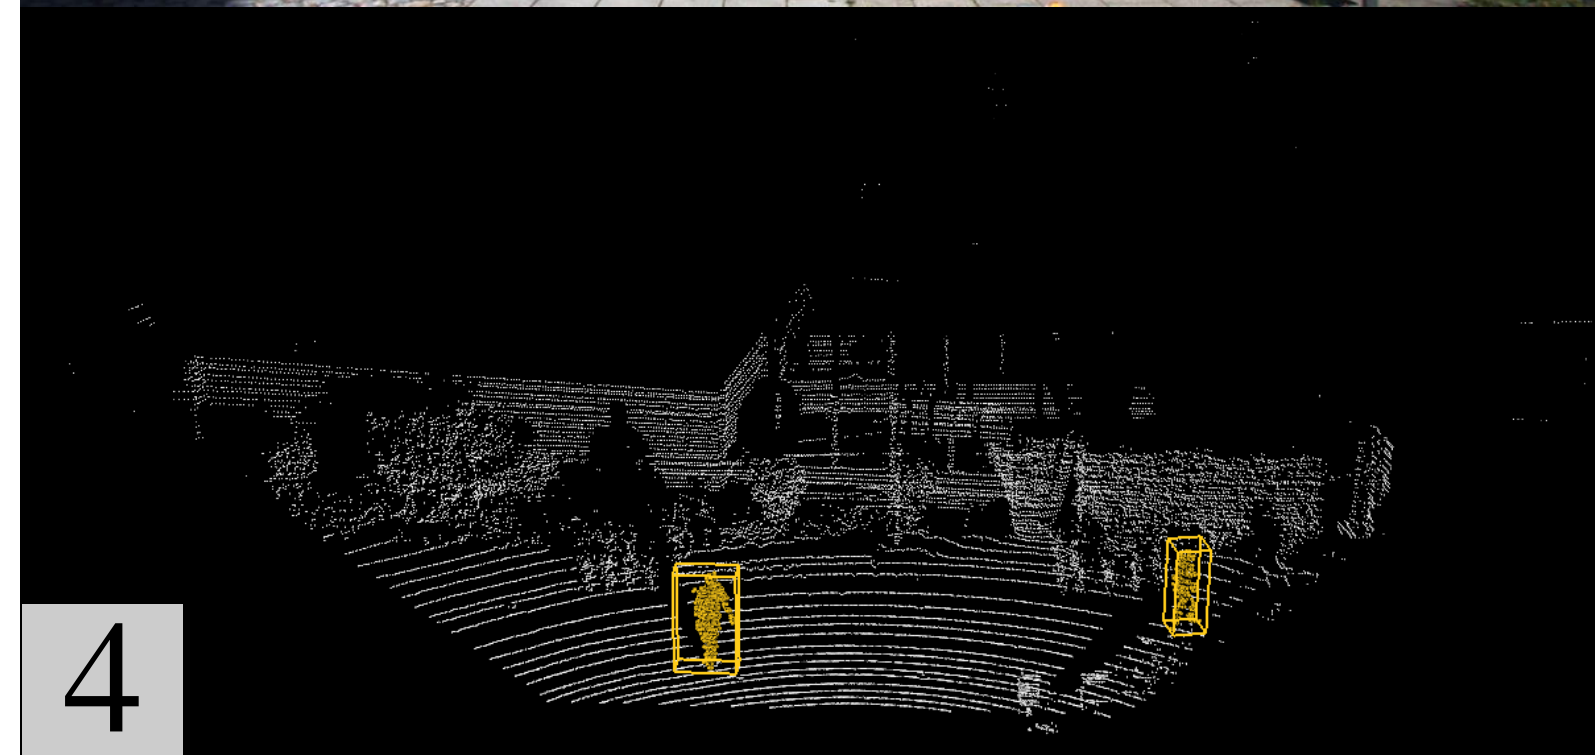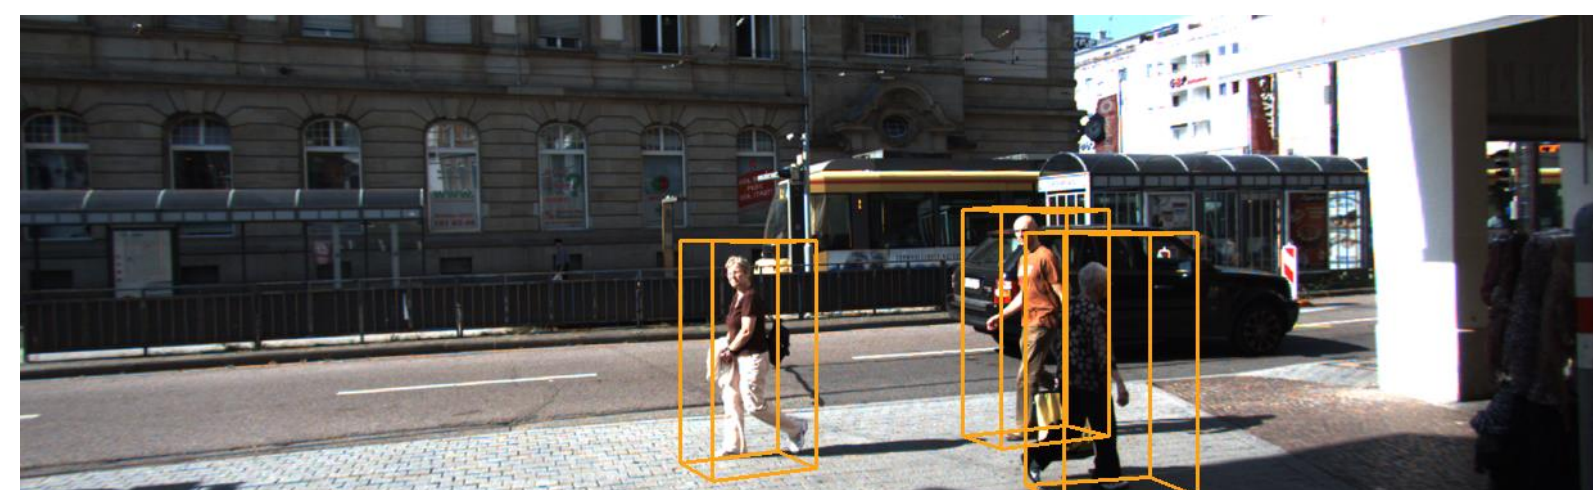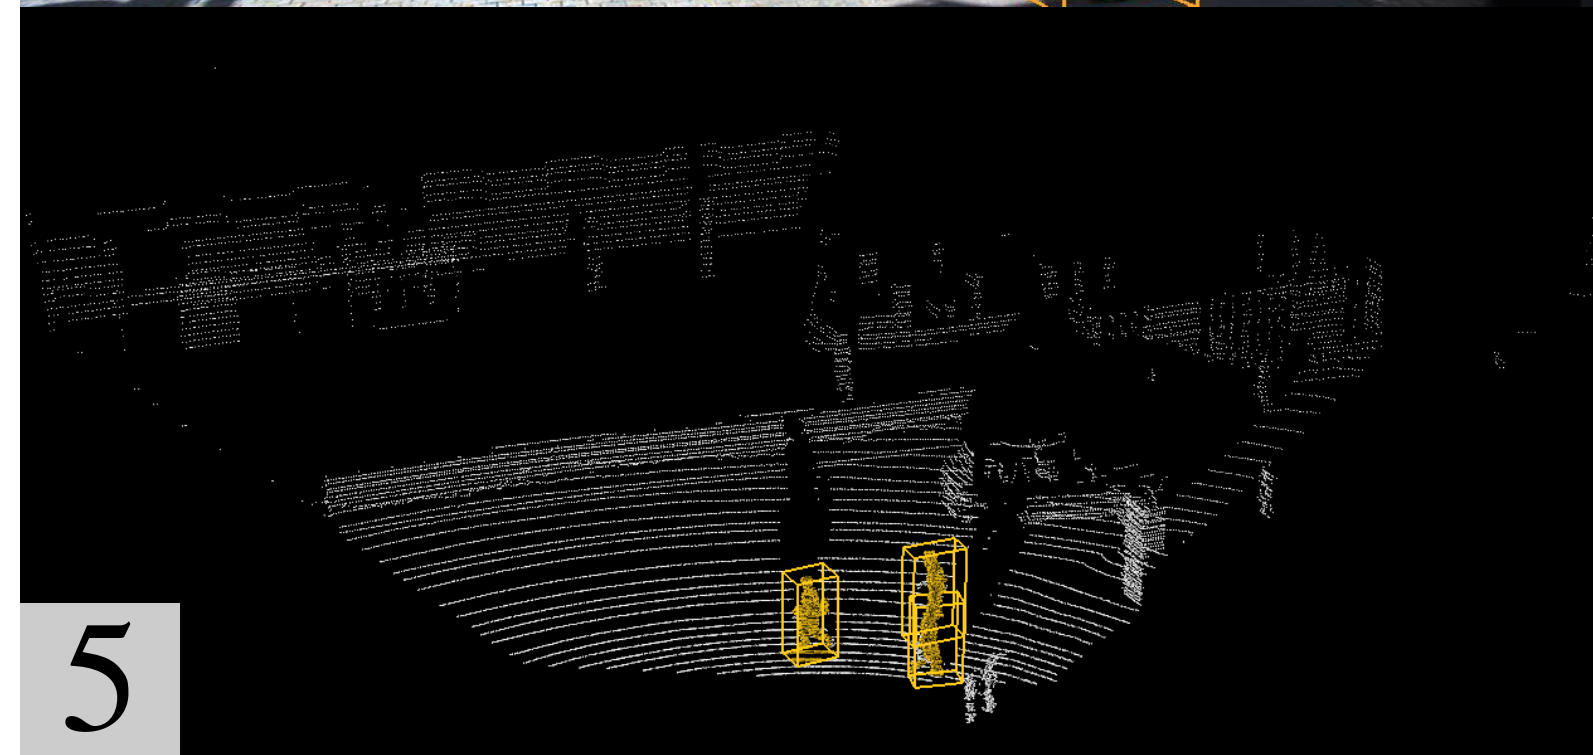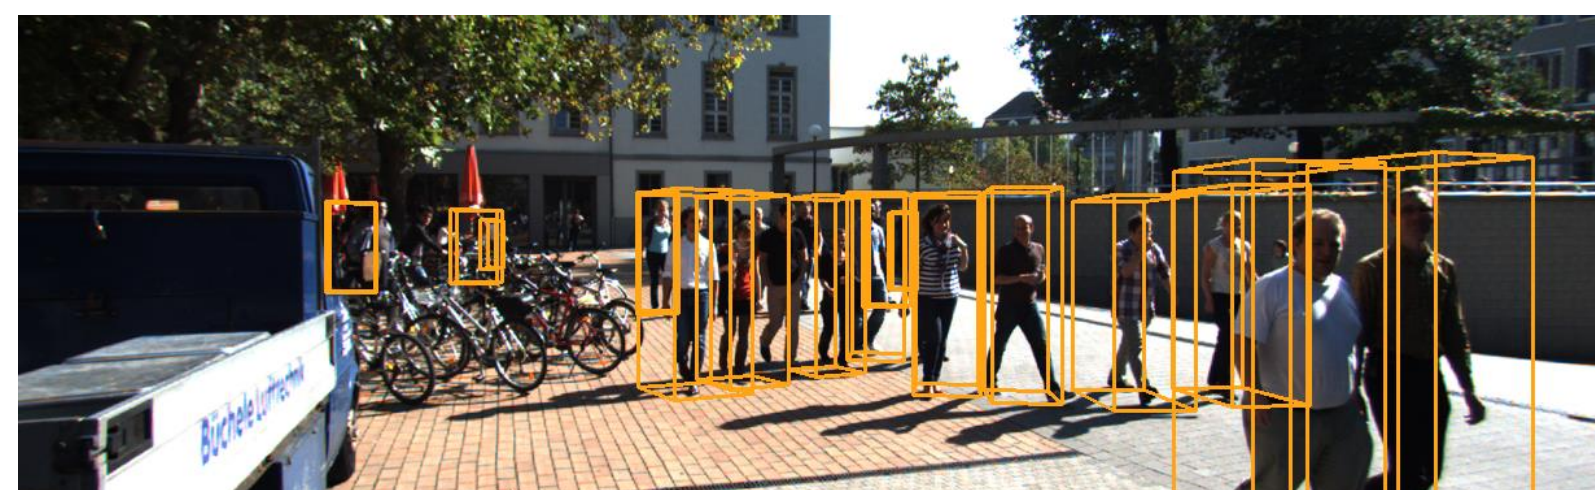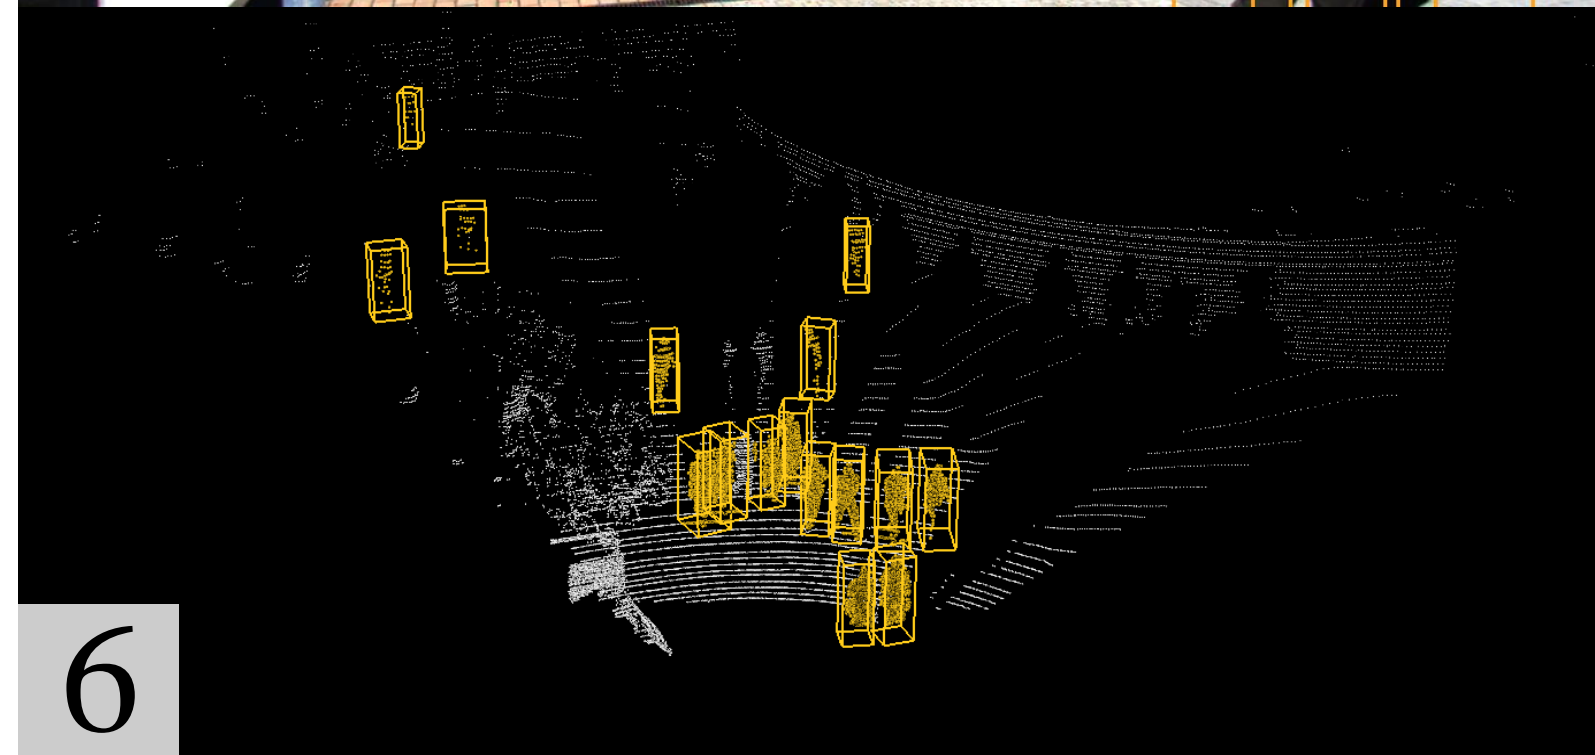

Supplement: Supplementary file 4 [file 123580511-supp.zip]

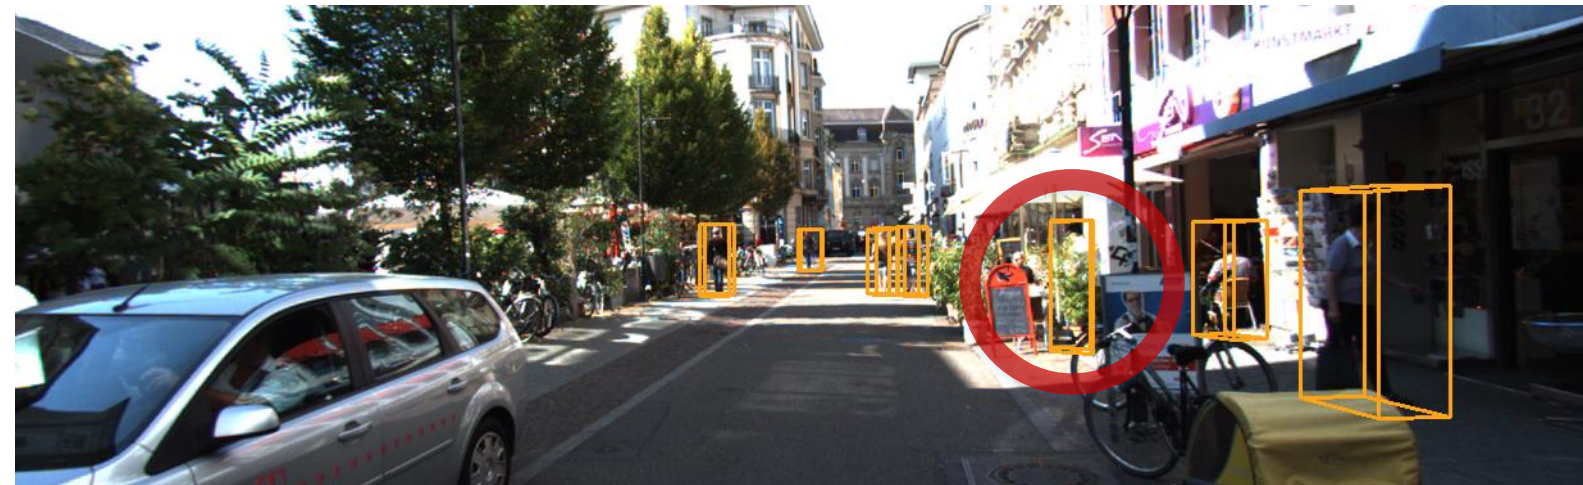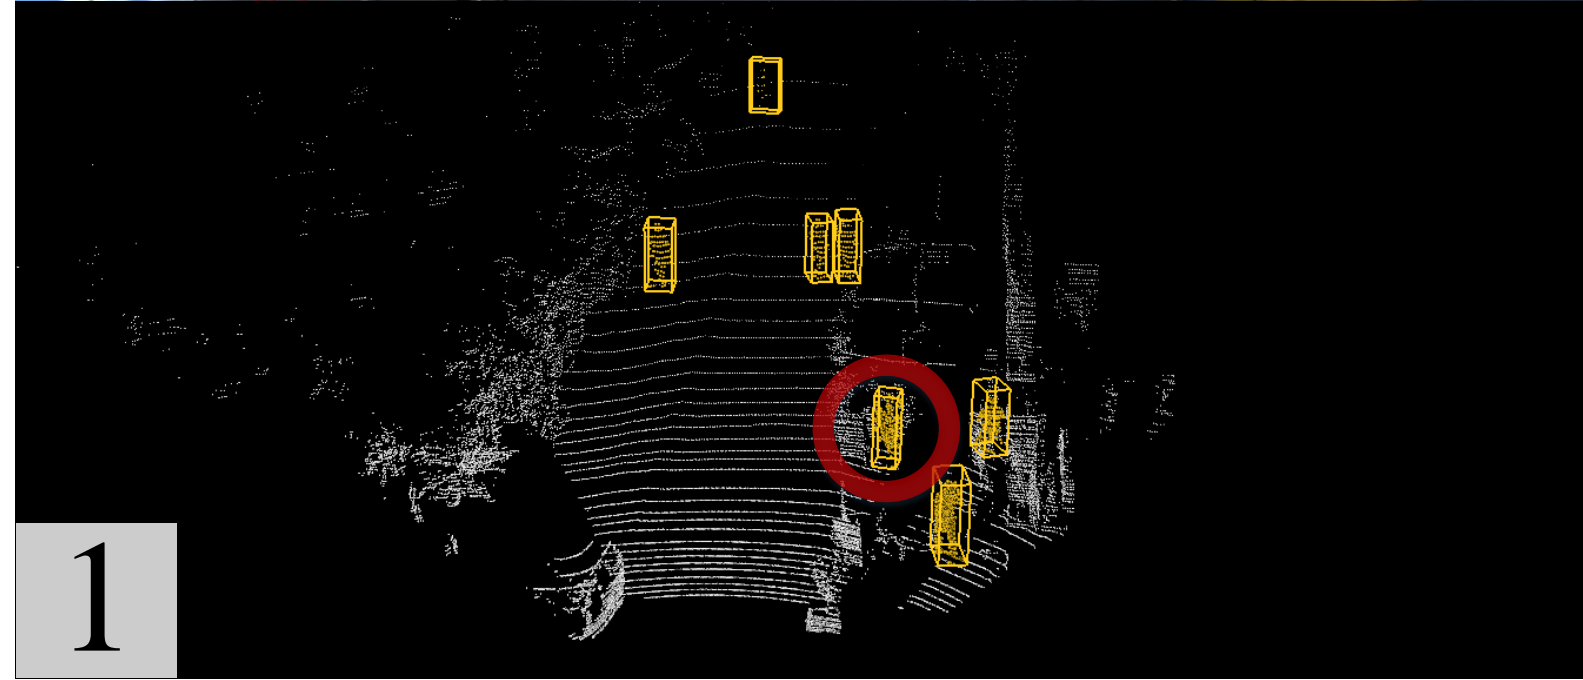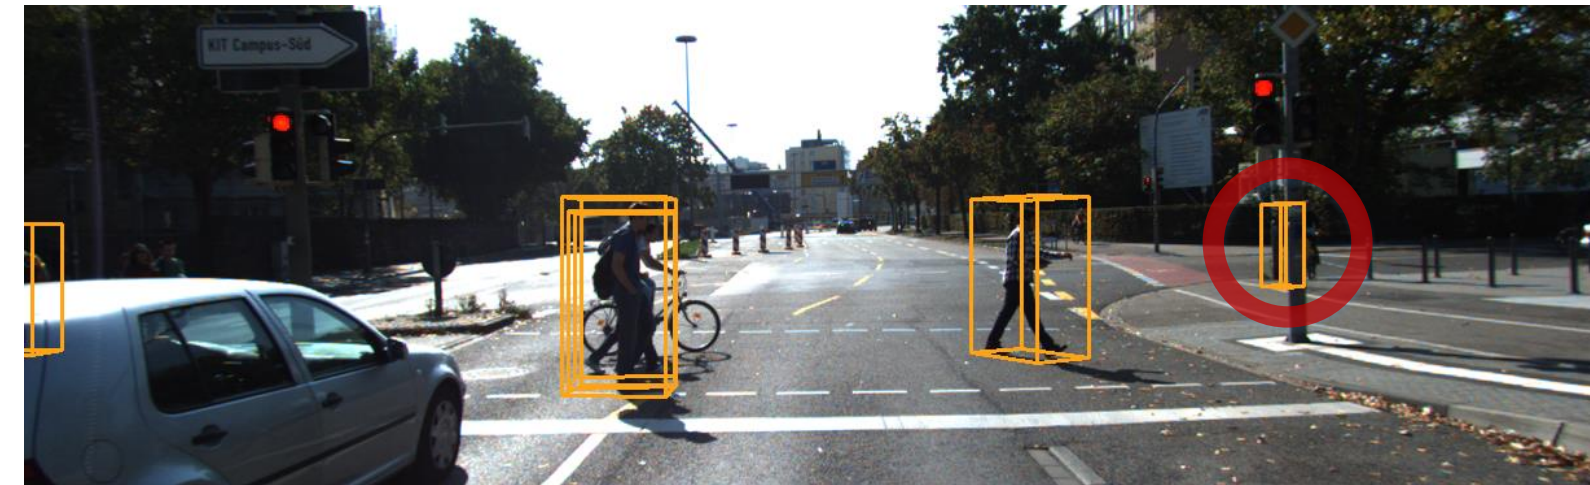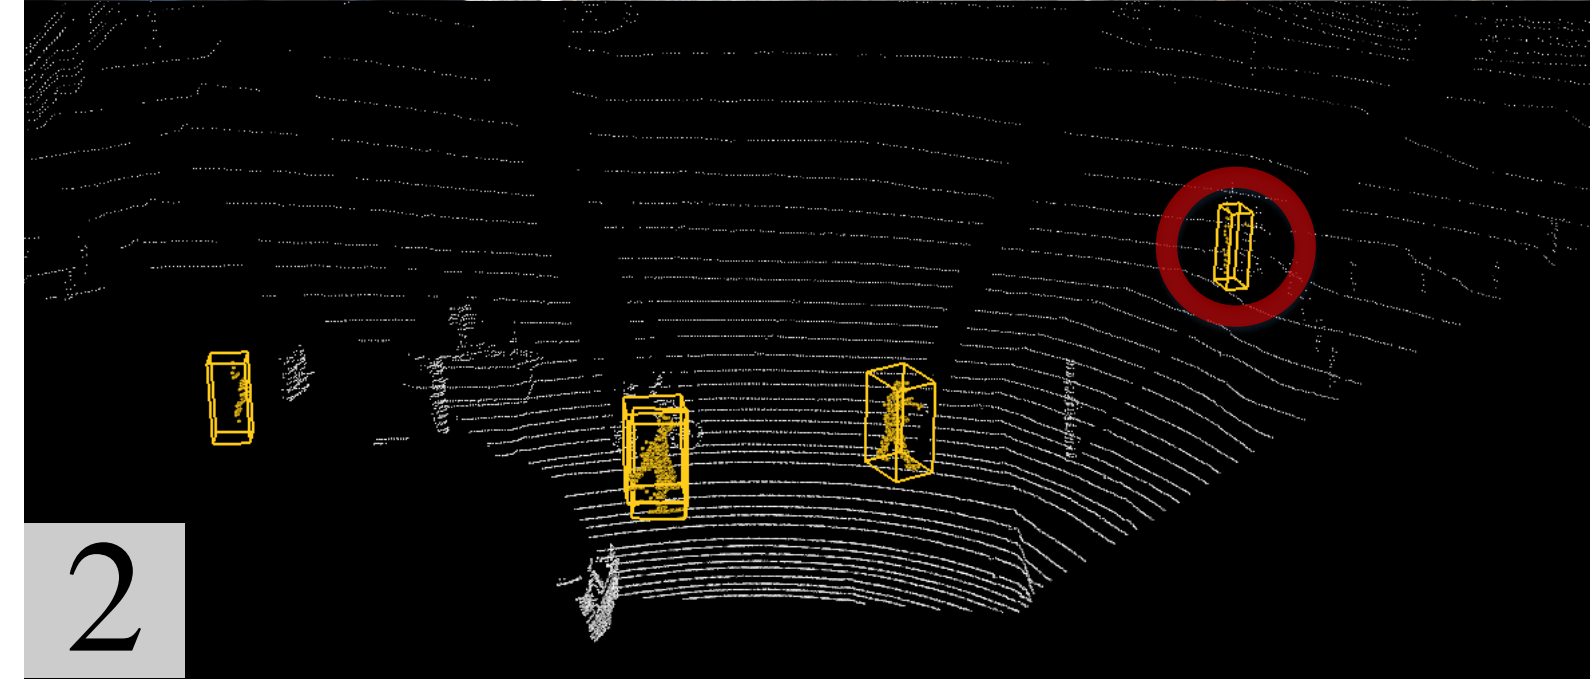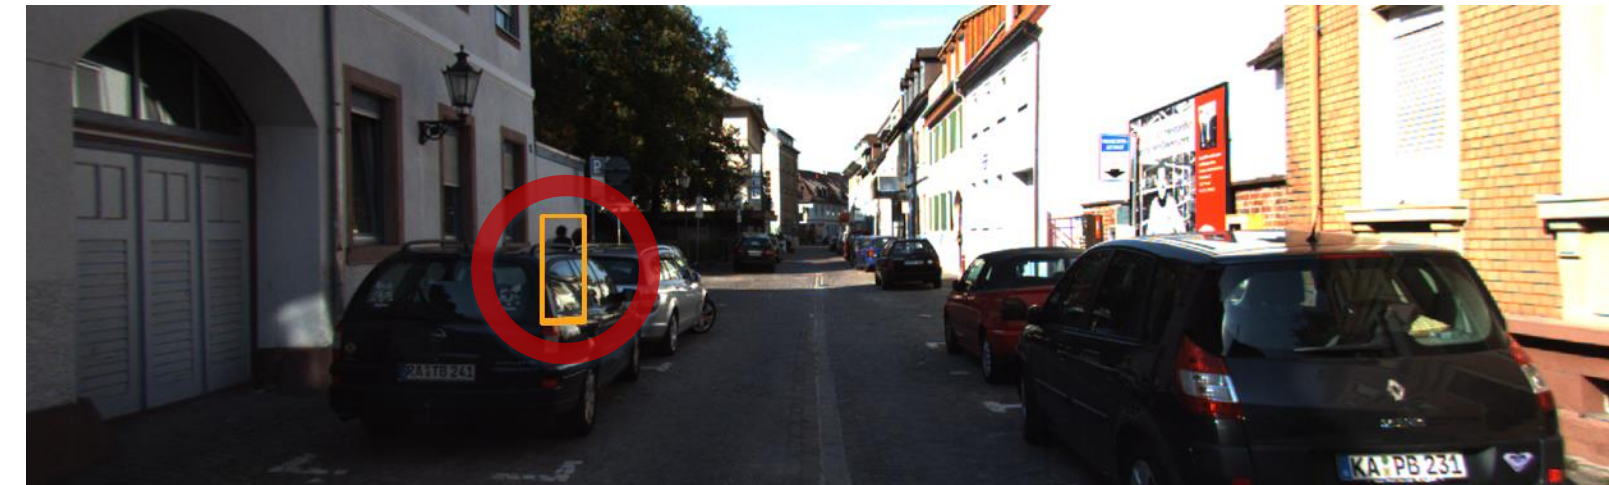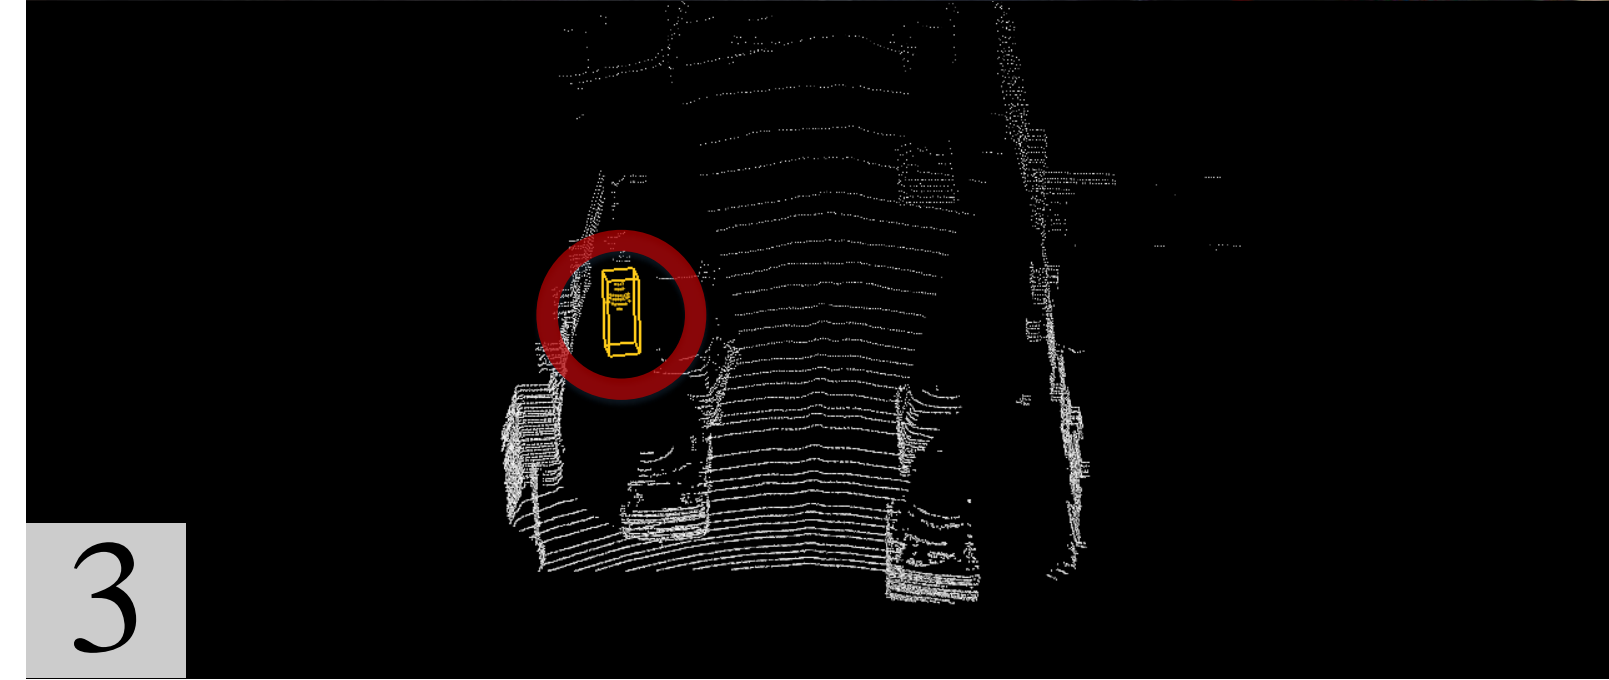

Supplement: Supplementary file 5 [file 123580511-supp.zip]
